# Supplementary material for: Integration of Physiological, Transcriptomic and Metabolomic Reveals Molecular Mechanism of Paraisaria dubia Response to Zn2+ Stress
Source: J Fungi (Basel). 2023 Jun 21;9(7):693. doi: 10.3390/jof9070693 (PMC10381912; doi:10.3390/jof9070693)
Supplement: Supplementary file 1 [file jof-09-00693-s001.zip › Wang et al. Supplementary data 2.xlsx]

## Sheet: Table S1
Table S1. Summary of transcriptome data in mycelia of P. dubia
Transcriptome data		Function annotion
Output results
Clean reads (mean)	48916488
GC percentage (mean)	0.5835
Q20 (mean) of clean reads	0.9796
Q30 (mean) of clean reads	0.9403
Assembly results of transcripts		Transcripts
Total number	22663	KEGG_annotation	9926
Total bases	88672377	Swissprot_annotation	15665
Greatest length (bp)	31623	Pfam_annotation	15674
Smallest length (bp)	201	GO_annotation	16123
Average length (bp)	3912.65	eggNOG_annotation	18273
N50 length (bp)	5914	NR_annotation	19137
E90N50 length (bp)	4382	Total_annotation	19402
Fragments mapped (%)	85.45
GC content (%)	60.01
Assembly results of genes		Genes
Total number	8075	KEGG_annotation	2810
Total bases	20306567	Swissprot_annotation	4274
Greatest length (bp)	31623	Pfam_annotation	4467
Smallest length (bp)	201	GO_annotation	4658
Average length (bp)	2514.75	eggNOG_annotation	5357
N50 length (bp)	4396	NR_annotation	5720
E90N50 length (bp)	4824	Total_annotation	5924
Fragments mapped (%)	86.675
GC content (%)	59.25

## Sheet: Table S2
Table S2. List of the DEGs involved in oxidative phosphorylation, glycolysis and tricarboxylic acid (TCA) cycle pathway, enzyme antioxidant system, autophagy and DNA repair
	Gene_id	NR description	FC(Zn2+ stress/Control)	Log2FC(Zn2+ stress/Control)	Pvalue	Padjust	Significant	Regulate	Zn2+ stress_1	Zn2+ stress_2	Zn2+ stress_3	Control_1	Control_2	Control_3	Zn2+ stress	Control
Oxidative phosphorylation	TRINITY_DN4529_c0_g2	NADH dehydrogenase subunit 5 [Tolypocladium ophioglossoides]	0.025	-5.31383	4.42523e-51	2.12845e-49	yes	down	1.17	1.26	2.3	10.73	33.3	32.21	1.57667	25.4133
	TRINITY_DN69_c0_g1	hypothetical protein CDD82_2074 [Ophiocordyceps australis]	0.285	-1.80873	4.1488e-35	1.1788e-33	yes	down	143.09	157.06	163.49	233.9	305.4	235.63	154.547	258.31
	TRINITY_DN3184_c0_g1	apocytochrome b [Hirsutella thompsonii]	0.024	-5.38947	2.90144e-26	5.37826e-25	yes	down	1.45	0.68	1.05	7.05	31.77	26.93	1.06	21.9167
	TRINITY_DN4741_c0_g2	cytochrome c oxidase subunit 1 [Epichloe festucae]	0.015	-6.02325	3.34536e-21	4.65378e-20	yes	down	1.35	0.87	2.76	24.03	65.47	64.29	1.66	51.2633
	TRINITY_DN4194_c0_g1	NADH dehydrogenase subunit 4 [Tolypocladium ophioglossoides]	0.028	-5.15665	3.94119e-16	3.87579e-15	yes	down	0.58	0.28	0.57	2.38	10.71	9.57	0.476667	7.55333
	TRINITY_DN2508_c1_g1	NADH dehydrogenase subunit 2 [Trichoderma gamsii]	0.018	-5.78733	2.16425e-15	2.0263e-14	yes	down	1.82	0.54	1.74	12.67	47.38	39.46	1.36667	33.17
	TRINITY_DN3308_c0_g5	ATP synthase F0 subunit a [Epichloe typhina]	0.015	-6.08978	7.7326e-15	6.8808e-14	yes	down	0.34	4.73	10.24	6.62	27.53	28.15	5.10333	20.7667
	TRINITY_DN6844_c0_g1	cytochrome c oxidase subunit 1 [Absidia glauca]	0.169	-2.5654	8.61106e-14	7.01759e-13	yes	down	14.4	16.1	12.33	62.4	20.75	30.23	14.2767	37.7933
	TRINITY_DN430_c0_g1	cytochrome c oxidase subunit 2 [Microbotryum cf. violaceum BFL-2013]	0.127	-2.97189	1.8745e-13	1.47692e-12	yes	down	6.33	9.57	6.8	38.04	15.67	18.91	7.56667	24.2067
	TRINITY_DN3558_c0_g2	cytochrome c oxidase subunit 3 [Rhodotorula mucilaginosa]	0.162	-2.6274	9.33488e-12	6.31972e-11	yes	down	10.31	10.78	8.3	47.18	15.33	18.21	9.79667	26.9067
	TRINITY_DN5178_c0_g8	TPA_inf: NADH dehydrogenase subunit 4 [Entomophthora muscae]	0.124	-3.01471	1.25025e-11	8.40236e-11	yes	down	1.99	1.93	2.09	12.29	3.77	5.53	2.00333	7.19667
	TRINITY_DN4034_c0_g1	NADH dehydrogenase subunit 1 [Phycomyces blakesleeanus]	0.15	-2.73521	4.86119e-11	3.0628e-10	yes	down	5.21	5.02	3.4	20.71	7.48	11.08	4.54333	13.09
	TRINITY_DN5178_c0_g4	NADH dehydrogenase subunit 2, partial [Amorphotheca resinae]	0.143	-2.80867	1.23614e-10	7.51175e-10	yes	down	2.68	3.77	2.52	14.45	7.03	5.61	2.99	9.03
	TRINITY_DN3266_c0_g3	apocytochrome b [Blastocladiella emersonii]	0.14	-2.83267	1.85544e-08	9.03054e-08	yes	down	7.97	2.51	2.71	7.73	13.77	20.38	4.39667	13.96
	TRINITY_DN5829_c0_g1	NADH dehydrogenase subunit 4 [Synchytrium microbalum]	0.146	-2.77467	3.33052e-08	1.5691e-07	yes	down	4.26	1.71	1.77	3.87	7.17	12.98	2.58	8.00667
	TRINITY_DN5920_c0_g1	apocytochrome b [Blastocladiella emersonii]	0.151	-2.72366	3.52863e-08	1.65819e-07	yes	down	7.54	4.66	4.5	30.11	8.41	9.69	5.56667	16.07
	TRINITY_DN6492_c0_g1	cytochrome c oxidase subunit 2 [Microbotryum cf. violaceum BFL-2013]	0.169	-2.56112	6.84275e-08	3.10838e-07	yes	down	18.62	7.12	8.77	15.11	24.9	46.04	11.5033	28.6833
	TRINITY_DN4529_c0_g4	NADH dehydrogenase subunit 4L [Trichoderma asperellum]	0.032	-4.97091	1.27513e-07	5.55246e-07	yes	down	0.39	0.07	0	0.7	2.27	3.72	0.153333	2.23
	TRINITY_DN4077_c0_g2	NADH dehydrogenase subunit 1 [Tolypocladium ophioglossoides]	0.027	-5.2133	3.8014e-07	1.57603e-06	yes	down	0.53	0	1.35	2.04	9.33	7.61	0.626667	6.32667
	TRINITY_DN3266_c0_g4	hypothetical protein G7K_6863-t1 [Saitoella complicata NRRL Y-17804]	0.17	-2.5597	2.79043e-06	1.0493e-05	yes	down	1.22	1.24	0.77	5.07	1.39	2.06	1.07667	2.84
	TRINITY_DN6886_c0_g1	LAGLIDADG endonuclease, partial [Chrysoporthe austroafricana]	0.01	-6.62589	3.68822e-06	1.36253e-05	yes	down	0	0	0.3	1.48	4.09	8.39	0.1	4.65333
	TRINITY_DN6116_c0_g1	NADH-ubiquinone oxidoreductase subunit 1 [Puccinia triticina]	0.178	-2.49074	8.34153e-05	0.000252927	yes	down	7.39	1.69	1.87	4.11	10.11	12.94	3.65	9.05333
	TRINITY_DN4627_c0_g1	NADH dehydrogenase subunit 2, partial [Amorphotheca resinae]	0.171	-2.54716	9.48801e-05	0.000285222	yes	down	5.6	1.23	1.79	3.43	5.79	13.29	2.87333	7.50333
	TRINITY_DN3266_c0_g1	hypothetical protein G7K_6863-t1 [Saitoella complicata NRRL Y-17804]	0.201	-2.31457	0.000126077	0.000371714	yes	down	1.69	0.57	0.67	1.02	1.82	3.87	0.976667	2.23667
	TRINITY_DN5706_c0_g1	ATP synthase subunit beta, mitochondrial [Puccinia graminis f. sp. tritici CRL 75-36-700-3]	0.294	-1.76784	0.000254486	0.000717259	yes	down	1.09	1.36	2.02	3.46	1.6	1.68	1.49	2.24667
	TRINITY_DN7155_c0_g1	cytochrome c oxidase subunit 1 [Conidiobolus heterosporus]	0.178	-2.48987	0.000332441	0.00092075	yes	down	27.84	8.83	8.87	21.52	34.94	59.89	15.18	38.7833
	TRINITY_DN6083_c0_g1	NADH dehydrogenase subunit 3 [Lichtheimia hongkongensis]	0.091	-3.45369	0.000910003	0.00233987	yes	down	8.05	1.59	1.21	4.69	7.17	27.07	3.61667	12.9767
	TRINITY_DN3558_c0_g1	cytochrome c oxidase subunit 3 [Cystobasidium sp.]	0.191	-2.38985	0.00123967	0.00311995	yes	down	18.12	5.37	5.26	13.4	17.39	37.99	9.58333	22.9267
	TRINITY_DN4398_c0_g1	NADH dehydrogenase subunit 3 [Blastocladiella emersonii]	0.191	-2.39175	0.00269386	0.00636203	yes	down	6.44	15.39	10.08	30.21	8.37	9.17	10.6367	15.9167
	TRINITY_DN4743_c0_g1		0.135	-2.89037	0.00716853	0.0155568	yes	down	1.32	1.53	0.61	3.78	2.6	2.51	1.15333	2.96333
	TRINITY_DN2241_c0_g1	epsilon subunit of F1F0-ATP synthase N-terminal [Purpureocillium lilacinum]	2.286	1.19289	5.36066e-34	1.43451e-32	yes	up	450.98	503.46	523.82	102.79	91.72	93.34	492.753	95.95
Glycolysis and tricarboxylic acid (TCA) cycle	TRINITY_DN885_c0_g1	Acetyltransferase component of pyruvate dehydrogenase complex, partial [Tolypocladium paradoxum])	0.27	-1.89062	5.20004e-54	2.69486e-52	yes	down	3609.74	3392.08	3426.53	5698.4	4754.63	6351.87	3476.12	5601.63
	TRINITY_DN3317_c0_g1	Pyruvate carboxylase [Tolypocladium paradoxum])	0.402	-1.31486	6.59025e-22	9.52803e-21	yes	down	118.25	122.03	123.03	112.51	151.99	144.96	121.103	136.487
	TRINITY_DN895_c0_g1	hypothetical protein PCL_04851 [Purpureocillium lilacinum])	0.606	-0.723444	3.64508e-21	5.06115e-20	yes	down	103.97	105.43	108.88	80.32	69.79	80.51	106.093	76.8733
	TRINITY_DN1440_c0_g1	Aconitate hydratase, mitochondrial [Tolypocladium paradoxum])	0.592	-0.755237	9.27577e-17	9.48061e-16	yes	down	237.96	255.99	239.11	200.67	170.28	187.08	244.353	186.01
	TRINITY_DN1370_c0_g1	Malate dehydrogenase, cytoplasmic [Tolypocladium ophioglossoides CBS 100239])	0.541	-0.887479	1.23978e-12	9.04214e-12	yes	down	645.14	680.47	813.41	535.69	643.17	598.9	713.007	592.587
	TRINITY_DN3006_c0_g1	Isocitrate dehydrogenase [NADP], mitochondrial [Tolypocladium ophioglossoides CBS 100239])	0.539	-0.890937	2.04452e-11	1.33866e-10	yes	down	69.69	74.91	87.57	74.52	59.34	60.53	77.39	64.7967
	TRINITY_DN1523_c0_g1	succinate dehydrogenase flavoprotein subunit, mitochondrial precursor [Purpureocillium lilacinum])	0.77	-0.376801	4.21983e-07	1.73971e-06	yes	down	169.51	171.1	173.01	105.52	99.43	101.68	171.207	102.21
	TRINITY_DN625_c0_g1	hypothetical protein XA68_15049 [Ophiocordyceps unilateralis])	0.192	-2.38127	4.33543e-07	1.78636e-06	yes	down	77.29	89.88	136.52	202.93	373.68	156.2	101.23	244.27
	TRINITY_DN4644_c0_g1	hypothetical protein G6O67_003497 [Ophiocordyceps sinensis])	0.13	-2.9469	6.00143e-05	0.000185878	yes	down	0.54	1.56	0.83	1.95	3.83	4.11	0.976667	3.29667
	TRINITY_DN119_c0_g1	putative succinyl-CoA ligase [Metarhizium acridum CQMa 102])	0.811	-0.302289	0.0026254	0.00621231	yes	down	261.85	272.4	277.18	170.62	133.68	158.59	270.477	154.297
	TRINITY_DN2414_c0_g1	Citrate synthase [Hirsutella minnesotensis 3608])	0.801	-0.319623	0.0182717	0.0361164	yes	down	216.34	240.91	256.71	141.53	105.6	153.89	237.987	133.673
	TRINITY_DN885_c0_g1	Acetyltransferase component of pyruvate dehydrogenase complex, partial [Tolypocladium paradoxum])	0.27	-1.89062	5.20004e-54	2.69486e-52	yes	down	3609.74	3392.08	3426.53	5698.4	4754.63	6351.87	3476.12	5601.63
	TRINITY_DN6711_c0_g1	ATP-dependent 6-phosphofructokinase [Tolypocladium capitatum])	0.567	-0.818084	5.97769e-21	8.2378e-20	yes	down	42.05	44.32	48.51	37.63	34.14	36.29	44.96	36.02
	TRINITY_DN1331_c0_g1	Pyruvate kinase [Tolypocladium ophioglossoides CBS 100239])	0.622	-0.684114	1.75042e-09	9.57368e-09	yes	down	230.72	260.05	287.1	192.29	162.28	211.59	259.29	188.72
	TRINITY_DN517_c0_g1	hypothetical protein G6O67_003918 [Ophiocordyceps sinensis])	0.711	-0.49209	2.73816e-08	1.30421e-07	yes	down	563.13	620.95	692.2	384.39	373.56	402.93	625.427	386.96
	TRINITY_DN4568_c0_g4	fructose-1,6-bisphosphatase [Purpureocillium lilacinum])	0.772	-0.372842	1.03545e-06	4.11441e-06	yes	down	170.94	182.84	178.81	98.95	103.92	109.13	177.53	104
	TRINITY_DN4441_c0_g1	hypothetical protein CDD83_375 [Cordyceps sp. RAO-2017])	0.656	-0.609065	6.69774e-05	0.000206661	yes	down	330.5	356.67	382.06	227.55	192.47	304.18	356.41	241.4
	TRINITY_DN1768_c0_g1	acetate--CoA ligase [Purpureocillium lilacinum])	0.602	-0.731704	0.000222331	0.000632201	yes	down	103.66	119.88	115.3	64.81	107.67	78.36	112.947	83.6133
	TRINITY_DN4731_c0_g1	glyceraldehyde-3-phosphate dehydrogenase, partial [Neocallimastix frontalis])	0.214	-2.22617	0.000238675	0.000676063	yes	down	3.03	1.2	1.05	3.61	0.91	2.29	1.76	2.27
	TRINITY_DN6060_c0_g1	putative L-lactate dehydrogenase [Scedosporium apiospermum])	0.163	-2.61828	0.0010537	0.00268495	yes	down	0.34	1.01	0.44	2.6	0.65	1.44	0.596667	1.56333
	TRINITY_DN133_c0_g1	Protein KES1 [Tolypocladium paradoxum])	0.807	-0.310172	0.0107212	0.0223632	yes	down	272.9	276.34	304.1	168.34	127.93	172.78	284.447	156.35
	TRINITY_DN4346_c0_g1	fructose-bisphosphate aldolase [Catenaria anguillulae PL171])	0.139	-2.85096	0.0253093	0.0483266	yes	down	0	1.49	0.31	2.76	1.06	1.04	0.6	1.62
	TRINITY_DN596_c0_g1	Succinate dehydrogenase [ubiquinone] cytochrome b small subunit, mitochondrial [Tolypocladium ophioglossoides CBS 100239])	1.613	0.68988	3.86528e-15	3.54229e-14	yes	up	717.55	766.19	724.88	186.85	189.34	183.72	736.207	186.637
	TRINITY_DN3263_c0_g1	hypothetical protein CDD83_9781 [Cordyceps sp. RAO-2017])	3.441	1.78302	4.84973e-47	2.0511e-45	yes	up	85.07	101.14	92.62	12.3	12.09	11.77	92.9433	12.0533
	TRINITY_DN68_c0_g1	hypothetical protein CDD83_2144 [Cordyceps sp. RAO-2017])	2.808	1.48948	2.07962e-25	3.73266e-24	yes	up	420.14	451.59	473.31	59.7	79.97	54.63	448.347	64.7667
	TRINITY_DN911_c0_g1	Hexokinase [Ophiocordyceps camponoti-floridani])	1.721	0.782861	4.4326e-22	6.47212e-21	yes	up	178.34	190.93	194.13	50.34	48.18	47.67	187.8	48.73
	TRINITY_DN5364_c0_g1	hypothetical protein FOZG_14589 [Fusarium oxysporum Fo47])	105.147	6.71626	4.09663e-07	1.69176e-06	yes	up	7.04	12.54	5.1	0	0	0	8.22667	0
	TRINITY_DN981_c0_g1	hypothetical protein PCL_05854 [Purpureocillium lilacinum])	1.518	0.601904	1.74385e-06	6.73649e-06	yes	up	219.42	248.31	261.54	67.49	75.73	62.45	243.09	68.5567
	TRINITY_DN767_c0_g1	Putative aldehyde dehydrogenase-like protein [Metarhizium anisopliae BRIP 53293])	1.757	0.81307	9.0966e-06	3.1711e-05	yes	up	2828.68	2207.39	2621.44	684.19	410.28	632.23	2552.5	575.567
Enzyme antioxidant system	TRINITY_DN2843_c0_g1	peroxiredoxin type-2 [Purpureocillium lilacinum])	0.182	-2.45463	5.18593e-122	1.06009e-119	yes	down	1432.93	1535.21	1666.89	8889.49	7568.89	9152.95	1545.01	8537.11
	TRINITY_DN1641_c0_g1	Superoxide dismutase [Moelleriella libera RCEF 2490])	0.201	-2.31584	4.1537e-88	4.77611e-86	yes	down	1105.44	1251.96	995.47	2243.25	2529.49	2468.25	1117.62	2413.66
	TRINITY_DN1176_c0_g1	Lcc2 [Ophiocordyceps sinensis CO18])	0.113	-3.14154	1.05834e-64	7.48876e-63	yes	down	191.85	195.16	191.99	546.31	871.37	909.71	193	775.797
	TRINITY_DN2151_c0_g1	Lethal(2) giant larvae protein, partial [Tolypocladium paradoxum])	0.482	-1.05304	6.15842e-47	2.56044e-45	yes	down	39.84	39.89	41.75	39.01	36.06	39.68	40.4933	38.25
	TRINITY_DN3766_c0_g1	Catalase [Tolypocladium paradoxum])	0.532	-0.909784	3.63386e-18	4.09519e-17	yes	down	72.22	69.71	72.35	54.89	60.06	68.44	71.4267	61.13
	TRINITY_DN2912_c0_g1	Linoleate 10R-lipoxygenase [Tolypocladium paradoxum])	0.485	-1.04253	4.0473e-10	2.3452e-09	yes	down	166.59	191.13	202.37	131.92	193.81	195.47	186.697	173.733
	TRINITY_DN3035_c0_g1	hypothetical protein CP533_6403 [Ophiocordyceps sp. 'camponoti-saundersi'])	0.421	-1.24915	1.33624e-08	6.62181e-08	yes	down	358.88	398.55	361.64	274.85	526.78	392.22	373.023	397.95
	TRINITY_DN1573_c0_g1	hypothetical protein TOPH_01522 [Tolypocladium ophioglossoides CBS 100239])	0.755	-0.406109	5.36216e-07	2.19589e-06	yes	down	135.8	139.11	145.79	122.99	90.77	115.34	140.233	109.7
	TRINITY_DN2241_c0_g1	epsilon subunit of F1F0-ATP synthase N-terminal [Purpureocillium lilacinum])	2.286	1.19289	5.36066e-34	1.43451e-32	yes	up	450.98	503.46	523.82	102.79	91.72	93.34	492.753	95.95
	TRINITY_DN2055_c0_g1	uncharacterized protein ANOM_009330 [Aspergillus nomiae NRRL 13137])	3.669	1.87522	1.12673e-06	4.46023e-06	yes	up	13.41	13.9	15.91	1.89	2.11	1.05	14.4067	1.68333
	TRINITY_DN1721_c0_g1	hypothetical protein CDD81_7967 [Ophiocordyceps australis])	1.69	0.756887	2.24572e-10	1.33276e-09	yes	up	30.62	32.85	31.57	8.78	10.19	8.23	31.68	9.06667
	TRINITY_DN2842_c0_g1	COX17 protein [Beauveria bassiana ARSEF 2860])	1.742	0.800762	0.000892579	0.00229748	yes	up	389.05	393.23	465.58	115.05	64.23	81.87	415.953	87.05
Autophagy	TRINITY_DN548_c0_g1	Inositol polyphosphate multikinase [Tolypocladium ophioglossoides CBS 100239])	0.196	-2.35323	2.45225e-83	2.57802e-81	yes	down	46.24	40.95	46.77	91.94	97.88	114.93	44.6533	101.583
	TRINITY_DN2914_c0_g1	hypothetical protein G6O67_008076 [Ophiocordyceps sinensis])	0.368	-1.44379	2.54758e-58	1.53669e-56	yes	down	58.67	58.19	62.52	78.25	66.56	76.13	59.7933	73.6467
	TRINITY_DN1584_c0_g1	Serine palmitoyltransferase 2 [Tolypocladium ophioglossoides CBS 100239])	0.35	-1.51586	1.53353e-54	8.1189e-53	yes	down	115.48	112.3	123.3	164.14	135.98	152.86	117.027	150.993
	TRINITY_DN6706_c0_g1	Phosphatidylinositol 3-kinase tor2 [Tolypocladium paradoxum])	0.44	-1.18315	4.73754e-48	2.11294e-46	yes	down	39.44	43.25	43.89	41.49	42.75	46.76	42.1933	43.6667
	TRINITY_DN4410_c0_g1	Serine/threonine-protein kinase apg-1 [Tolypocladium paradoxum])	0.404	-1.30728	1.5131e-38	4.97092e-37	yes	down	23.61	23.51	25.34	25.63	28.12	27.62	24.1533	27.1233
	TRINITY_DN2373_c1_g1	Carboxylesterase A [Tolypocladium ophioglossoides CBS 100239])	0.069	-3.85258	2.46626e-35	7.14536e-34	yes	down	1.2	1.78	1.36	6.2	11.37	10.46	1.44667	9.34333
	TRINITY_DN1148_c0_g1	autophagy-like protein 3 [Purpureocillium lilacinum])	0.415	-1.26805	1.33777e-29	3.01983e-28	yes	down	44.54	45.71	48.05	51.03	54.33	46.46	46.1	50.6067
	TRINITY_DN668_c0_g2	Putative inositol polyphosphate kinase [Tolypocladium paradoxum])	0.475	-1.07286	3.07196e-25	5.40826e-24	yes	down	26.23	30.49	30.84	26.76	28.25	32.51	29.1867	29.1733
	TRINITY_DN1964_c0_g1	Cyclin [Tolypocladium paradoxum])	0.422	-1.2447	7.25586e-13	5.36103e-12	yes	down	304.24	209.54	217.49	246.12	267.91	277.38	243.757	263.803
	TRINITY_DN1673_c0_g1	Vacuolar protein sorting-associated protein 11, partial [Tolypocladium paradoxum])	0.426	-1.23148	5.32103e-12	3.68021e-11	yes	down	42.02	42.7	44.53	33.47	52.18	52.19	43.0833	45.9467
	TRINITY_DN2745_c0_g1	cAMP-dependent protein kinase catalytic subunit [Tolypocladium paradoxum])	2.029	1.02091	3.76108e-20	4.82191e-19	yes	up	146.83	157.16	160.11	31.8	37.31	34.05	154.7	34.3867
	TRINITY_DN3628_c0_g1	Uncharacterized protein TPAR_01369 [Tolypocladium paradoxum])	2.079	1.05615	4.07193e-05	0.000128828	yes	up	5.88	7.34	6.69	1.16	1.36	1.71	6.63667	1.41
DNA repair and replication	TRINITY_DN183_c0_g1	DNA replication licensing factor mcm10 [Tolypocladium paradoxum])	0.082	-3.61554	1.58225e-107	2.4774e-105	yes	down	30.33	31.89	34.99	123.91	171.88	194.16	32.4033	163.317
	TRINITY_DN485_c0_g1	Putative cryptochrome DASH [Hirsutella minnesotensis 3608])	0.336	-1.57416	1.63323e-70	1.32076e-68	yes	down	57.06	61.17	68.95	83.94	83.58	84.04	62.3933	83.8533
	TRINITY_DN2178_c0_g1	DNA damage-binding protein 1a [Tolypocladium paradoxum])	0.4	-1.32084	1.35071e-45	5.40211e-44	yes	down	89.41	99.38	109.49	113.97	103.26	119.6	99.4267	112.277
	TRINITY_DN2992_c0_g1	hypothetical protein TOPH_05843 [Tolypocladium ophioglossoides CBS 100239])	0.423	-1.24101	2.53005e-31	6.24788e-30	yes	down	59.97	61.78	63.07	58.57	65.03	73.13	61.6067	65.5767
	TRINITY_DN5423_c0_g1	Multi antimicrobial extrusion protein [Tolypocladium paradoxum])	0.083	-3.59931	9.54868e-28	1.94113e-26	yes	down	1.15	1.54	1.69	7.54	4.9	11.63	1.46	8.02333
	TRINITY_DN2164_c0_g1	hypothetical protein HIM_12087 [Hirsutella minnesotensis 3608])	0.241	-2.05089	1.04381e-20	1.39662e-19	yes	down	18.32	16.79	11.42	31	26.18	27.9	15.51	28.36
	TRINITY_DN116_c0_g1	DNA repair protein RAD16, partial [Tolypocladium paradoxum])	0.393	-1.34852	3.02492e-14	2.57942e-13	yes	down	136.1	139.69	144.41	184.6	111.19	190.44	140.067	162.077
	TRINITY_DN3511_c0_g1	hypothetical protein DCS_03334 [Drechmeria coniospora])	2.724	1.44575	3.19971e-25	5.61973e-24	yes	up	37.27	37.78	33.56	6.03	6.4	5.69	36.2033	6.04
	TRINITY_DN2847_c0_g1	Replication factor A protein 2 [Tolypocladium capitatum])	3.376	1.75541	7.21415e-60	4.49906e-58	yes	up	389.22	389.24	387.22	58.03	48.31	48.93	388.56	51.7567
	TRINITY_DN2014_c0_g1	DNA repair protein rhp54 [Tolypocladium paradoxum])	3.169	1.66425	2.83791e-58	1.67074e-56	yes	up	133.54	154.79	138.65	18.91	19.6	22.26	142.327	20.2567
	TRINITY_DN91_c0_g1	DNA polymerase type-X family protein pol4 [Tolypocladium paradoxum])	3.251	1.70074	3.99527e-53	2.05603e-51	yes	up	203.55	211.61	197.69	31.09	25.12	27.83	204.283	28.0133
	TRINITY_DN1104_c0_g1	hypothetical protein CP533_6638 [Ophiocordyceps sp. 'camponoti-saundersi'])	2.207	1.14187	6.40427e-32	1.61401e-30	yes	up	97.12	99.21	102.45	18.76	21	21.29	99.5933	20.35
	TRINITY_DN177_c0_g1	transmembrane protein [Purpureocillium lilacinum])	2.131	1.09147	9.29618e-14	7.55084e-13	yes	up	26.11	25.12	23.99	6.15	5.04	4.9	25.0733	5.36333
	TRINITY_DN3019_c0_g1	hypothetical protein HIM_05379 [Hirsutella minnesotensis 3608])	12.379	3.62984	3.12574e-07	1.30844e-06	yes	up	5.65	7.55	7.24	0.22	0.29	0.25	6.81333	0.253333
Glutathione metabolism	TRINITY_DN1403_c0_g2	hypothetical protein CDD83_4157 [Cordyceps sp. RAO-2017])	2.741	1.45478	4.32078e-27	8.52456e-26	yes	up	974.55	963.07	822.76	144.27	160.81	135.37	920.127	146.817
	TRINITY_DN3260_c0_g1	Gamma-glutamyltranspeptidase 1 [Tolypocladium paradoxum])	2.966	1.56862	1.119e-17	1.21099e-16	yes	up	25.92	30.88	32.85	5.07	3.77	4.72	29.8833	4.52
Apoptosis inducing factor	TRINITY_DN1551_c0_g1	Apoptosis-inducing factor 1 [Tolypocladium capitatum])	1.572	0.652511	3.88973e-05	0.000123488	yes	up	177.56	190.79	175.41	52.62	60.08	42.63	181.253	51.7767

## Sheet: Table S3
Table S3. List of the DEGs involved in ion transport
	Gene_id	NR description	FC(Zn2+ stress/Control)	Log2FC(Zn2+ stress/Control)	Pvalue	Padjust	Significant	Regulate	Zn2+ stress_1	Zn2+ stress_2	Zn2+ stress_3	Control_1	Control_2	Control_3	Zn2+ stress	Control
ZIP	TRINITY_DN1271_c0_g1	Zinc transporter ZIP9, partial [Tolypocladium paradoxum])	2.151	1.10481	5.86467e-11	3.66679e-10	yes	up	85.19	93.13	91.33	23.62	14.5	18.02	89.8833	18.7133
	TRINITY_DN557_c0_g1	ZIP Zinc transporter [Ophiocordyceps sinensis CO18])	1.962	0.972393	6.77753e-09	3.48052e-08	yes	up	20.44	20.28	18.09	4.09	4.54	4.57	19.6033	4.4
	TRINITY_DN2032_c0_g1	Zinc-regulated transporter 3 [Tolypocladium paradoxum])	0.067	-3.90838	9.57473e-120	1.85422e-117	yes	down	26.73	28.07	27.36	157.44	228.03	170.88	27.3867	185.45
	TRINITY_DN3417_c0_g1	hypothetical protein HIM_01407 [Hirsutella minnesotensis 3608])	0.542	-0.883877	5.6296e-15	5.10829e-14	yes	down	66.76	71.11	71.81	54.93	64.06	55.98	69.8933	58.3233
	TRINITY_DN1468_c0_g1	Homeobox-leucine zipper protein HDG11 [Tolypocladium ophioglossoides CBS 100239])	0.538	-0.893279	5.08677e-11	3.19672e-10	yes	down	56.13	53.74	59.46	52.83	53.85	42.3	56.4433	49.66
ABC	TRINITY_DN4407_c0_g1	hypothetical protein CDD83_3548 [Cordyceps sp. RAO-2017])	18.787	4.23167	3.73624e-79	3.666e-77	yes	up	68.07	75.28	47.03	1.69	1.56	1.36	63.46	1.53667
	TRINITY_DN4071_c0_g1	ABC transporter CDR4 [Tolypocladium paradoxum])	3.314	1.72851	5.31056e-47	2.23317e-45	yes	up	98.58	106.48	87.79	12.87	12.78	14.56	97.6167	13.4033
	TRINITY_DN626_c0_g1	hypothetical protein ED733_005110 [Metarhizium rileyi])	3.294	1.72004	1.89101e-28	4.10501e-27	yes	up	80.33	92.88	110.75	15.59	20.24	16.42	94.6533	17.4167
	TRINITY_DN7089_c0_g1	Putative ATP-dependent bile acid permease [Podospora comata])	2.111	1.07773	1.11563e-11	7.53202e-11	yes	up	48.21	53.2	52.43	12.75	10.29	9.36	51.28	10.8
	TRINITY_DN3424_c0_g1	Putative ABC transporter ATP-binding protein/permease [Tolypocladium paradoxum])	4.002	2.00082	8.84037e-11	5.43495e-10	yes	up	49.27	48.62	34.99	7.21	4.46	3.14	44.2933	4.93667
	TRINITY_DN2435_c0_g1	Canalicular multispecific organic anion transporter 2 [Tolypocladium ophioglossoides CBS 100239])	2.183	1.12611	4.63766e-06	1.6837e-05	yes	up	240.43	269.91	260.36	56.59	108.19	54.63	256.9	73.1367
	TRINITY_DN3968_c0_g1	Putative ABC transporter ATP-binding protein/permease [Tolypocladium paradoxum])	0.279	-1.83931	4.98788e-61	3.19181e-59	yes	down	24.49	29.15	25.96	39.19	43.08	47.14	26.5333	43.1367
	TRINITY_DN4408_c0_g1	ABC transporter, transmembrane domain, type 1 [Ophiocordyceps sinensis CO18])	0.082	-3.60016	2.32878e-104	3.36029e-102	yes	down	2.69	2.66	3.08	15.04	12.81	18.75	2.81	15.5333
	TRINITY_DN2674_c0_g1	ABC transporter CDR4 [Tolypocladium paradoxum])	0.365	-1.45519	2.31284e-26	4.30891e-25	yes	down	35.51	33.67	28.38	37.49	42.19	41.97	32.52	40.55
	TRINITY_DN2665_c0_g1	putative ABC transporter ATP-binding protein [Tolypocladium ophioglossoides CBS 100239])	0.499	-1.00358	5.19673e-12	3.60101e-11	yes	down	57.86	65.46	65.34	46.08	62.51	62.88	62.8867	57.1567
	TRINITY_DN129_c0_g1	Putative ATP-dependent permease [Tolypocladium paradoxum])	0.372	-1.42614	2.02653e-10	1.20853e-09	yes	down	122.94	135.42	134.83	116.73	218.23	142.1	131.063	159.02
	TRINITY_DN3758_c0_g1	ABC transporter ced-7 [Tolypocladium ophioglossoides CBS 100239])	0.492	-1.02348	4.62684e-08	2.14414e-07	yes	down	6.25	6.62	6.99	4.91	7.31	6.1	6.62	6.10667
Efflux pump	TRINITY_DN3446_c0_g1	hypothetical protein ATETN484_0011046800 [Aspergillus terreus])	19.476	4.28366	2.64588e-07	1.11838e-06	yes	up	4.01	4.65	5.55	0.15	0.17	0	4.73667	0.106667
	TRINITY_DN445_c0_g1	MFS-type transporter [Tolypocladium capitatum])	1.974	0.981177	1.77909e-10	1.06355e-09	yes	up	57.77	47.05	47.59	10.47	16.27	13.01	50.8033	13.25
	TRINITY_DN191_c0_g1	multidrug resistance protein [Purpureocillium lilacinum])	1.988	0.991077	1.15709e-13	9.33668e-13	yes	up	211.83	213.12	181.81	50.18	46.76	43.92	202.253	46.9533
	TRINITY_DN159_c0_g1	putative HC-toxin efflux carrier TOXA [Tolypocladium ophioglossoides CBS 100239])	1.647	0.719803	0.00102638	0.0026208	yes	up	47	55.32	52.92	14.23	19.75	11.43	51.7467	15.1367
	TRINITY_DN3679_c0_g1	hypothetical protein PCL_08614 [Purpureocillium lilacinum])	1.528	0.612106	0.000673922	0.0017668	yes	up	33.24	44.08	46.89	11.53	13.36	11.18	41.4033	12.0233
	TRINITY_DN489_c0_g1	Uncharacterized protein TPAR_00842 [Tolypocladium paradoxum])	1.485	0.5708	3.5046e-11	2.24459e-10	yes	up	221.64	243.84	242.11	75.34	63.85	77.26	235.863	72.15
	TRINITY_DN1896_c0_g1	Major facilitator superfamily domain, general substrate transporter [Tolypocladium paradoxum])	1.48	0.565998	1.49949e-10	9.0449e-10	yes	up	470.37	518.52	534.66	118.01	155.28	128.65	507.85	133.98
	TRINITY_DN4957_c0_g2	probable aflatoxin efflux pump AFLT [Claviceps purpurea 20.1])	0.115	-3.12034	0.00692152	0.0150474	yes	down	0.32	0.73	0.3	1.8	1.72	1.02	0.45	1.51333
HMAs	TRINITY_DN1867_c0_g1	Major facilitator superfamily domain, general substrate transporter [Tolypocladium paradoxum])	1.374	0.457966	0.000310751	0.000864126	yes	up	240.47	274.36	309.81	87.5	99.24	85.21	274.88	90.65
MFS	TRINITY_DN3101_c0_g1	hypothetical protein CDD83_9307 [Cordyceps sp. RAO-2017])	4.623	2.20873	5.1e-70	4.03e-68	yes	up	91.31	92.84	97.43	9.81	9.01	8.4	93.86	9.07333
	TRINITY_DN1389_c0_g1	Drug resistance protein [Tolypocladium ophioglossoides CBS 100239])	2.727	1.44731	2.1e-39	7.08e-38	yes	up	50.52	54.19	53.2	9.28	8.99	7.98	52.6367	8.75
	TRINITY_DN791_c0_g1	Major facilitator superfamily domain-containing protein 10 [Tolypocladium ophioglossoides CBS 100239])	2.587	1.37107	1.5e-31	3.73e-30	yes	up	87.87	87.9	98.41	14.54	17.87	16.78	91.3933	16.3967
	TRINITY_DN254_c0_g1	Succinyl-CoA ligase [ADP-forming] subunit alpha [Beauveria bassiana D1-5])	2.028	1.02006	9e-31	2.17e-29	yes	up	155.08	164.13	165.53	60.69	37.79	37.54	161.58	45.34
	TRINITY_DN1532_c0_g1	High-affinity nicotinic acid transporter [Tolypocladium ophioglossoides CBS 100239])	3.613	1.85309	1.35e-28	2.95e-27	yes	up	39.51	44.06	34.77	4.53	5.56	4.56	39.4467	4.88333
	TRINITY_DN3988_c0_g1	hypothetical protein G6O67_005658 [Ophiocordyceps sinensis])	97.336	6.6049	3.03e-25	5.37e-24	yes	up	270.13	266.42	217.46	0.34	1.99	1.11	251.337	1.14667
	TRINITY_DN33_c0_g1	putative transporter C11D3.18C [Tolypocladium ophioglossoides CBS 100239])	3.263	1.70627	8.65e-24	1.41e-22	yes	up	65.71	65.92	60.44	10.44	8.83	7.75	64.0233	9.00667
	TRINITY_DN1505_c0_g1	hypothetical protein CDD83_9399 [Cordyceps sp. RAO-2017])	2.978	1.5744	9.42e-24	1.52e-22	yes	up	61.45	64.42	62.81	10.25	10.5	8.15	62.8933	9.63333
	TRINITY_DN2557_c0_g1	major facilitator superfamily transporter [Trichoderma harzianum])	2.471	1.30533	5.99e-23	9.28e-22	yes	up	23.44	25.76	24.42	4.08	4.43	5	24.54	4.50333
	TRINITY_DN2483_c0_g1	uncharacterized protein E0L32_011993 [Phialemoniopsis curvata])	12.593	3.65453	6.45e-23	9.97e-22	yes	up	13.14	12.72	12.14	0.39	0.42	0.56	12.6667	0.456667
	TRINITY_DN2675_c0_g1	sugar transporter STL1 [Metarhizium robertsii ARSEF 23])	7.126	2.83312	7.14e-22	1.02e-20	yes	up	22.36	22.46	16.59	1.18	1.7	0.95	20.47	1.27667
	TRINITY_DN745_c0_g1	Pantothenate transporter liz1 [Tolypocladium ophioglossoides CBS 100239])	3.342	1.74057	8.4e-22	1.2e-20	yes	up	34.49	36.84	42.99	5.91	3.41	4.93	38.1067	4.75
	TRINITY_DN2327_c0_g1	Multidrug resistance protein 3 [Tolypocladium ophioglossoides CBS 100239])	2.01	1.00697	6.43e-18	7.07e-17	yes	up	53.51	58.96	55.99	12.39	12.67	12.47	56.1533	12.51
	TRINITY_DN988_c0_g1	Putative transporter [Tolypocladium paradoxum])	3.507	1.81044	1.79e-17	1.92e-16	yes	up	46.12	56.75	52.73	5.11	9.78	6.04	51.8667	6.97667
	TRINITY_DN3908_c0_g1	hypothetical protein HIM_00944 [Hirsutella minnesotensis 3608])	2.406	1.26692	2.67e-17	2.82e-16	yes	up	168.68	176.14	153.68	26.25	35.44	31.02	166.167	30.9033
	TRINITY_DN774_c0_g2	Uncharacterized protein TPAR_08103 [Tolypocladium paradoxum])	2.383	1.25275	8.92e-14	7.25e-13	yes	up	550.64	457.97	659.92	73.76	63.85	57.65	556.177	65.0867
	TRINITY_DN1095_c0_g1	hypothetical protein G6O67_007963 [Ophiocordyceps sinensis])	2.059	1.04197	4.06e-12	2.85e-11	yes	up	51.01	58.29	41.91	11.12	11.33	11.19	50.4033	11.2133
	TRINITY_DN2760_c0_g1	MFS quinate transporter [Purpureocillium lilacinum])	3.039	1.60366	1.82e-11	1.2e-10	yes	up	71.47	81.57	68.2	6.72	12.37	13.68	73.7467	10.9233
	TRINITY_DN2308_c0_g1	MFS maltose permease MalP [Purpureocillium lilacinum])	2.464	1.30091	2.16e-11	1.41e-10	yes	up	83.54	114.01	139.6	16.72	21.28	23.57	112.383	20.5233
	TRINITY_DN3536_c0_g1	monocarboxylate transporter [Pochonia chlamydosporia 170])	2.709	1.43781	2.26e-09	1.22e-08	yes	up	13.08	14.09	11.56	1.79	2.83	1.83	12.91	2.15
	TRINITY_DN3973_c0_g1	putative HC-toxin efflux carrier TOXA [Tolypocladium ophioglossoides CBS 100239])	50.479	5.65761	3.99e-05	0.000126313	yes	up	1.6	2.17	2.32	0	0	0	2.03	0
	TRINITY_DN3319_c0_g1	membrane protein, partial [Tolypocladium capitatum])	0.105	-3.25278	1.1e-152	3e-150	yes	down	105.1	117.33	104.24	464.88	519.04	432.36	108.89	472.093
	TRINITY_DN609_c0_g1	Nitrilase and fragile histidine triad fusion protein NitFhit [Tolypocladium ophioglossoides CBS 100239])	0.133	-2.91192	9.04e-73	7.65e-71	yes	down	62.08	68.62	65.16	174.22	262.51	232.07	65.2867	222.933
	TRINITY_DN585_c0_g1	putative transporter [Tolypocladium ophioglossoides CBS 100239])	0.153	-2.70995	1.08e-52	5.47e-51	yes	down	155.22	158.08	172.62	393.15	600.13	434.73	161.973	476.003
	TRINITY_DN6700_c0_g1	Siderophore iron transporter 1 [Tolypocladium paradoxum])	0.237	-2.07949	1.58e-46	6.45e-45	yes	down	13.4	16.73	15.08	27.33	25.16	33.19	15.07	28.56
	TRINITY_DN967_c0_g1	hypothetical protein M434DRAFT_397799 [Hypoxylon sp. CO27-5])	0.341	-1.55298	5.16e-42	1.89e-40	yes	down	161.18	200.71	164.42	235.17	211.05	254.21	175.437	233.477
	TRINITY_DN320_c0_g1	hypothetical protein HIM_07341 [Hirsutella minnesotensis 3608])	0.176	-2.50656	2.72e-37	8.42e-36	yes	down	65.33	61.57	82.71	158.91	219.22	147.33	69.87	175.153
	TRINITY_DN4477_c0_g1	GliA [Verticillium alfalfae VaMs.102])	0.281	-1.83025	4.8e-35	1.34e-33	yes	down	23.68	24.16	24.48	35.75	32.63	47.37	24.1067	38.5833
	TRINITY_DN6745_c0_g1	hypothetical protein HIM_01942 [Hirsutella minnesotensis 3608])	0.224	-2.15728	4.23e-34	1.14e-32	yes	down	28.88	33.53	28.6	75.37	50.29	55.06	30.3367	60.24
	TRINITY_DN3925_c0_g1	hexose transporter protein [Pochonia chlamydosporia 123])	0.367	-1.44674	2.86e-24	4.81e-23	yes	down	12.36	12.02	12.64	13.94	15.21	16.13	12.34	15.0933
	TRINITY_DN2437_c1_g1	Repressible high-affinity phosphate permease [Tolypocladium paradoxum])	0.241	-2.05068	2.54e-15	2.36e-14	yes	down	38.83	38.49	42.12	98.15	40.79	85.95	39.8133	74.9633
	TRINITY_DN1677_c0_g1	hypothetical protein G6O67_004515 [Ophiocordyceps sinensis])	0.35	-1.51425	2.92e-14	2.5e-13	yes	down	1224.93	1401.9	1581.62	1399.32	2330.44	1690.61	1402.82	1806.79
	TRINITY_DN3445_c0_g1	Putative peptide transporter ptr2 [Tolypocladium paradoxum])	0.403	-1.3111	1.42e-12	1.04e-11	yes	down	14.91	15.71	14.28	16.52	12.67	22.2	14.9667	17.13
	TRINITY_DN1243_c0_g1	MFS general substrate transporter [Tolypocladium paradoxum])	0.481	-1.05513	3.77e-07	1.56e-06	yes	down	145.58	185.77	138.75	106.54	179.94	146.52	156.7	144.333
	TRINITY_DN2185_c0_g1	hypothetical protein G6O67_002715 [Ophiocordyceps sinensis])	0.483	-1.05096	1.09e-20	1.46e-19	yes	down	60.68	62.91	66.75	52.05	60.5	59.71	63.4467	57.42

## Sheet: Table S4
Table S4. List of the DEGs involved in EPS synthesis
	Gene_id	NR description	FC(Zn2+ stress/Control)	Log2FC(Zn2+ stress/Control)	Pvalue	Padjust	Significant	Regulate	Zn2+ stress_1	Zn2+ stress_2	Zn2+ stress_3	Control_1	Control_2	Control_3	Zn2+ stress	Control
HK	TRINITY_DN911_c0_g1	Hexokinase [Ophiocordyceps camponoti-floridani])	1.721	0.782861	4.4326e-22	6.47212e-21	yes	up	178.34	190.93	194.13	50.34	48.18	47.67	187.8	48.73
GALE	TRINITY_DN4039_c0_g1	hypothetical protein HIM_00512 [Hirsutella minnesotensis 3608])	8.908	3.15514	5.51651e-16	5.34861e-15	yes	up	6.66	8.09	6.78	0.47	0.37	0.23	7.17667	0.356667
PGM	TRINITY_DN4136_c0_g1	phosphoglucomutase [Purpureocillium lilacinum])	1.202	0.265853	0.00152686	0.0037718	yes	up	179.89	187.94	192.5	67.48	72.33	69.59	186.777	69.8
PMM	TRINITY_DN479_c0_g1	hypothetical protein V502_07065 [Pseudogymnoascus sp. VKM F-4520 (FW-2644)])	1.235	0.30483	0.0064499	0.0141222	yes	up	206.94	221.47	265.97	87.58	78.77	86.12	231.46	84.1567
GTs	TRINITY_DN5822_c0_g1	hypothetical protein CDD83_10809 [Cordyceps sp. RAO-2017])	2293.06	11.1631	2.12238e-20	2.76436e-19	yes	up	47.42	56.67	31.47	0	0	0	45.1867	0
	TRINITY_DN978_c2_g1	glycosyl transferase [Purpureocillium lilacinum])	1.684	0.752218	1.22857e-10	7.47195e-10	yes	up	76.84	75.8	79.17	20.2	17.94	24.49	77.27	20.8767
	TRINITY_DN1057_c0_g1	Dolichyl pyrophosphate Man9GlcNAc2 alpha-1,3-glucosyltransferase [Tolypocladium paradoxum])	1.652	0.723784	2.27429e-09	1.22702e-08	yes	up	216.54	242.22	236.94	55.9	58.86	75.79	231.9	63.5167
	TRINITY_DN997_c0_g1	Dolichyl pyrophosphate Glc1Man9GlcNAc2 alpha-1,3-glucosyltransferase [Tolypocladium paradoxum])	1.602	0.67987	2.35223e-08	1.13064e-07	yes	up	66.57	74.74	75.5	18.48	22.02	19.93	72.27	20.1433
	TRINITY_DN4174_c0_g1	Cellulose synthase catalytic subunit [UDP-forming] [Tolypocladium paradoxum])	1.273	0.348204	3.96229e-05	0.000125629	yes	up	293.78	300.69	300.47	98.64	107.22	111.72	298.313	105.86
	TRINITY_DN3541_c0_g1	hypothetical protein CDD83_2618 [Cordyceps sp. RAO-2017])	15.525	3.95654	5.76688e-05	0.000179368	yes	up	3.68	3.41	2.85	0.19	0.09	0	3.31333	0.0933333
	TRINITY_DN4809_c0_g1	hypothetical protein HIM_02772 [Hirsutella minnesotensis 3608])	1.956	0.967822	0.00013446	0.000394062	yes	up	9.69	12.26	11.68	2.27	2.57	2.81	11.21	2.55
	TRINITY_DN3688_c0_g1	Beta-1,4-mannosyl-glycoprotein 4-beta-N-acetylglucosaminyltransferase [Tolypocladium paradoxum])	1.353	0.436633	0.000431981	0.00117391	yes	up	161.33	190.06	189.1	52.29	63.55	59.64	180.163	58.4933
	TRINITY_DN2069_c0_g1	hypothetical protein CDD83_7111 [Cordyceps sp. RAO-2017])	1.182	0.240915	0.00443567	0.0100592	yes	up	191.03	208.52	204.73	73.21	71.08	81.27	201.427	75.1867
	TRINITY_DN6266_c0_g1	Uncharacterized protein TPAR_06424 [Tolypocladium paradoxum])	1.579	0.659144	0.0127621	0.0261169	yes	up	11.83	12.7	10.34	3.33	3.29	3.11	11.6233	3.24333
	TRINITY_DN1035_c0_g1	Sterol 3-beta-glucosyltransferase UGT80B1 [Tolypocladium paradoxum])	0.846	-0.241691	0.00304514	0.00713214	yes	down	84.88	91.06	86.96	47.24	43.52	46.96	87.6333	45.9067
	TRINITY_DN130_c0_g2	hypothetical protein CDD83_2509 [Cordyceps sp. RAO-2017])	0.322	-1.63401	0.000104995	0.000313072	yes	down	3.47	5.06	3.02	8.28	3.71	3.72	3.85	5.23667
	TRINITY_DN1497_c0_g1	Putative alpha,alpha-trehalose-phosphate synthase [UDP-forming] [Tolypocladium paradoxum])	0.337	-1.56736	1.22335e-15	1.16014e-14	yes	down	157.91	154.14	176.65	177.05	282.68	191.14	162.9	216.957
MFS	TRINITY_DN3101_c0_g1	hypothetical protein CDD83_9307 [Cordyceps sp. RAO-2017])	4.623	2.20873	5.1e-70	4.03e-68	yes	up	91.31	92.84	97.43	9.81	9.01	8.4	93.86	9.07333
	TRINITY_DN1389_c0_g1	Drug resistance protein [Tolypocladium ophioglossoides CBS 100239])	2.727	1.44731	2.1e-39	7.08e-38	yes	up	50.52	54.19	53.2	9.28	8.99	7.98	52.6367	8.75
	TRINITY_DN791_c0_g1	Major facilitator superfamily domain-containing protein 10 [Tolypocladium ophioglossoides CBS 100239])	2.587	1.37107	1.5e-31	3.73e-30	yes	up	87.87	87.9	98.41	14.54	17.87	16.78	91.3933	16.3967
	TRINITY_DN254_c0_g1	Succinyl-CoA ligase [ADP-forming] subunit alpha [Beauveria bassiana D1-5])	2.028	1.02006	9e-31	2.17e-29	yes	up	155.08	164.13	165.53	60.69	37.79	37.54	161.58	45.34
	TRINITY_DN1532_c0_g1	High-affinity nicotinic acid transporter [Tolypocladium ophioglossoides CBS 100239])	3.613	1.85309	1.35e-28	2.95e-27	yes	up	39.51	44.06	34.77	4.53	5.56	4.56	39.4467	4.88333
	TRINITY_DN3988_c0_g1	hypothetical protein G6O67_005658 [Ophiocordyceps sinensis])	97.336	6.6049	3.03e-25	5.37e-24	yes	up	270.13	266.42	217.46	0.34	1.99	1.11	251.337	1.14667
	TRINITY_DN33_c0_g1	putative transporter C11D3.18C [Tolypocladium ophioglossoides CBS 100239])	3.263	1.70627	8.65e-24	1.41e-22	yes	up	65.71	65.92	60.44	10.44	8.83	7.75	64.0233	9.00667
	TRINITY_DN1505_c0_g1	hypothetical protein CDD83_9399 [Cordyceps sp. RAO-2017])	2.978	1.5744	9.42e-24	1.52e-22	yes	up	61.45	64.42	62.81	10.25	10.5	8.15	62.8933	9.63333
	TRINITY_DN2557_c0_g1	major facilitator superfamily transporter [Trichoderma harzianum])	2.471	1.30533	5.99e-23	9.28e-22	yes	up	23.44	25.76	24.42	4.08	4.43	5	24.54	4.50333
	TRINITY_DN2483_c0_g1	uncharacterized protein E0L32_011993 [Phialemoniopsis curvata])	12.593	3.65453	6.45e-23	9.97e-22	yes	up	13.14	12.72	12.14	0.39	0.42	0.56	12.6667	0.456667
	TRINITY_DN2675_c0_g1	sugar transporter STL1 [Metarhizium robertsii ARSEF 23])	7.126	2.83312	7.14e-22	1.02e-20	yes	up	22.36	22.46	16.59	1.18	1.7	0.95	20.47	1.27667
	TRINITY_DN745_c0_g1	Pantothenate transporter liz1 [Tolypocladium ophioglossoides CBS 100239])	3.342	1.74057	8.4e-22	1.2e-20	yes	up	34.49	36.84	42.99	5.91	3.41	4.93	38.1067	4.75
	TRINITY_DN2327_c0_g1	Multidrug resistance protein 3 [Tolypocladium ophioglossoides CBS 100239])	2.01	1.00697	6.43e-18	7.07e-17	yes	up	53.51	58.96	55.99	12.39	12.67	12.47	56.1533	12.51
	TRINITY_DN988_c0_g1	Putative transporter [Tolypocladium paradoxum])	3.507	1.81044	1.79e-17	1.92e-16	yes	up	46.12	56.75	52.73	5.11	9.78	6.04	51.8667	6.97667
	TRINITY_DN3908_c0_g1	hypothetical protein HIM_00944 [Hirsutella minnesotensis 3608])	2.406	1.26692	2.67e-17	2.82e-16	yes	up	168.68	176.14	153.68	26.25	35.44	31.02	166.167	30.9033
	TRINITY_DN774_c0_g2	Uncharacterized protein TPAR_08103 [Tolypocladium paradoxum])	2.383	1.25275	8.92e-14	7.25e-13	yes	up	550.64	457.97	659.92	73.76	63.85	57.65	556.177	65.0867
	TRINITY_DN1095_c0_g1	hypothetical protein G6O67_007963 [Ophiocordyceps sinensis])	2.059	1.04197	4.06e-12	2.85e-11	yes	up	51.01	58.29	41.91	11.12	11.33	11.19	50.4033	11.2133
	TRINITY_DN2760_c0_g1	MFS quinate transporter [Purpureocillium lilacinum])	3.039	1.60366	1.82e-11	1.2e-10	yes	up	71.47	81.57	68.2	6.72	12.37	13.68	73.7467	10.9233
	TRINITY_DN2308_c0_g1	MFS maltose permease MalP [Purpureocillium lilacinum])	2.464	1.30091	2.16e-11	1.41e-10	yes	up	83.54	114.01	139.6	16.72	21.28	23.57	112.383	20.5233
	TRINITY_DN3536_c0_g1	monocarboxylate transporter [Pochonia chlamydosporia 170])	2.709	1.43781	2.26e-09	1.22e-08	yes	up	13.08	14.09	11.56	1.79	2.83	1.83	12.91	2.15
	TRINITY_DN3973_c0_g1	putative HC-toxin efflux carrier TOXA [Tolypocladium ophioglossoides CBS 100239])	50.479	5.65761	3.99e-05	0.000126313	yes	up	1.6	2.17	2.32	0	0	0	2.03	0
	TRINITY_DN3319_c0_g1	membrane protein, partial [Tolypocladium capitatum])	0.105	-3.25278	1.1e-152	3e-150	yes	down	105.1	117.33	104.24	464.88	519.04	432.36	108.89	472.093
	TRINITY_DN609_c0_g1	Nitrilase and fragile histidine triad fusion protein NitFhit [Tolypocladium ophioglossoides CBS 100239])	0.133	-2.91192	9.04e-73	7.65e-71	yes	down	62.08	68.62	65.16	174.22	262.51	232.07	65.2867	222.933
	TRINITY_DN585_c0_g1	putative transporter [Tolypocladium ophioglossoides CBS 100239])	0.153	-2.70995	1.08e-52	5.47e-51	yes	down	155.22	158.08	172.62	393.15	600.13	434.73	161.973	476.003
	TRINITY_DN6700_c0_g1	Siderophore iron transporter 1 [Tolypocladium paradoxum])	0.237	-2.07949	1.58e-46	6.45e-45	yes	down	13.4	16.73	15.08	27.33	25.16	33.19	15.07	28.56
	TRINITY_DN967_c0_g1	hypothetical protein M434DRAFT_397799 [Hypoxylon sp. CO27-5])	0.341	-1.55298	5.16e-42	1.89e-40	yes	down	161.18	200.71	164.42	235.17	211.05	254.21	175.437	233.477
	TRINITY_DN320_c0_g1	hypothetical protein HIM_07341 [Hirsutella minnesotensis 3608])	0.176	-2.50656	2.72e-37	8.42e-36	yes	down	65.33	61.57	82.71	158.91	219.22	147.33	69.87	175.153
	TRINITY_DN4477_c0_g1	GliA [Verticillium alfalfae VaMs.102])	0.281	-1.83025	4.8e-35	1.34e-33	yes	down	23.68	24.16	24.48	35.75	32.63	47.37	24.1067	38.5833
	TRINITY_DN6745_c0_g1	hypothetical protein HIM_01942 [Hirsutella minnesotensis 3608])	0.224	-2.15728	4.23e-34	1.14e-32	yes	down	28.88	33.53	28.6	75.37	50.29	55.06	30.3367	60.24
	TRINITY_DN3925_c0_g1	hexose transporter protein [Pochonia chlamydosporia 123])	0.367	-1.44674	2.86e-24	4.81e-23	yes	down	12.36	12.02	12.64	13.94	15.21	16.13	12.34	15.0933
	TRINITY_DN2437_c1_g1	Repressible high-affinity phosphate permease [Tolypocladium paradoxum])	0.241	-2.05068	2.54e-15	2.36e-14	yes	down	38.83	38.49	42.12	98.15	40.79	85.95	39.8133	74.9633
	TRINITY_DN1677_c0_g1	hypothetical protein G6O67_004515 [Ophiocordyceps sinensis])	0.35	-1.51425	2.92e-14	2.5e-13	yes	down	1224.93	1401.9	1581.62	1399.32	2330.44	1690.61	1402.82	1806.79
	TRINITY_DN3445_c0_g1	Putative peptide transporter ptr2 [Tolypocladium paradoxum])	0.403	-1.3111	1.42e-12	1.04e-11	yes	down	14.91	15.71	14.28	16.52	12.67	22.2	14.9667	17.13
	TRINITY_DN1243_c0_g1	MFS general substrate transporter [Tolypocladium paradoxum])	0.481	-1.05513	3.77e-07	1.56e-06	yes	down	145.58	185.77	138.75	106.54	179.94	146.52	156.7	144.333
	TRINITY_DN2185_c0_g1	hypothetical protein G6O67_002715 [Ophiocordyceps sinensis])	0.483	-1.05096	1.09e-20	1.46e-19	yes	down	60.68	62.91	66.75	52.05	60.5	59.71	63.4467	57.42

## Sheet: Table S5
Table S5. List of the DEGs involved in microcycle conidiation
	Gene_id	NR description	FC(Zn2+ stress/Control)	Log2FC(Zn2+ stress/Control)	Pvalue	Padjust	Significant	Regulate	Zn2+ stress_1	Zn2+ stress_2	Zn2+ stress_3	Control_1	Control_2	Control_3	Zn2+ stress	Control
brlA	TRINITY_DN3620_c0_g1	Krueppel-like factor 11 [Tolypocladium ophioglossoides CBS 100239])	6.483	2.69657	6.03697e-48	2.66715e-46	yes	up	98.61	81.36	100.74	7.75	4.71	7.14	93.57	6.53333
vosA	TRINITY_DN1210_c0_g1	Uncharacterized protein TPAR_02808 [Tolypocladium paradoxum])	3.637	1.86275	2.63695e-17	2.79213e-16	yes	up	15.05	17.38	14.62	1.38	2.29	2.1	15.6833	1.92333
abaA	TRINITY_DN403_c0_g1	hypothetical protein AU210_001387 [Fusarium oxysporum f. sp. radicis-cucumerinum])	6.294	2.65396	5.7889e-36	1.71086e-34	yes	up	129.57	146.59	87.51	10.14	6.86	9.29	121.223	8.76333
LaeA	TRINITY_DN6718_c0_g1	Uncharacterized protein TPAR_08438 [Tolypocladium paradoxum])	2.052	1.03736	3.90154e-12	2.7475e-11	yes	up	68.49	67.51	57.66	12.7	14.64	14.92	64.5533	14.0867
	TRINITY_DN2175_c0_g1	hypothetical protein G6O67_007995 [Ophiocordyceps sinensis])	2.908	1.53995	2.76395e-07	1.16427e-06	yes	up	287.04	253.6	237.02	59.02	20.05	41.4	259.22	40.1567
ste12	TRINITY_DN1400_c0_g1	hypothetical protein CDD82_3733 [Ophiocordyceps australis])	0.426	-1.23188	3.50539e-18	3.95646e-17	yes	down	141.11	151.84	157.65	131.17	155.62	195.17	150.2	160.653
ppoC	TRINITY_DN2912_c0_g1	Linoleate 10R-lipoxygenase [Tolypocladium paradoxum])	0.485	-1.04253	4.0473e-10	2.3452e-09	yes	down	166.59	191.13	202.37	131.92	193.81	195.47	186.697	173.733
PpoA	TRINITY_DN1306_c0_g1	hypothetical protein G6O67_008754 [Ophiocordyceps sinensis])	0.001	-9.71773	0	0	yes	down	1.08	1.2	1	288.43	427.64	536.38	1.09333	417.483
atg3	TRINITY_DN1148_c0_g1	autophagy-like protein 3 [Purpureocillium lilacinum])	0.415	-1.26805	1.33777e-29	3.01983e-28	yes	down	44.54	45.71	48.05	51.03	54.33	46.46	46.1	50.6067
GPI	TRINITY_DN2441_c0_g1	GPI anchored endo-1,3(4)-beta-glucanase [Cordyceps javanica])	33.207	5.05341	5.18557e-18	5.79948e-17	yes	up	6.53	7.31	5.27	0.15	0.1	0	6.37	0.0833333
GPI	TRINITY_DN1445_c0_g1	hypothetical protein CDD83_1760 [Cordyceps sp. RAO-2017])	1.864	0.898561	7.78211e-28	1.59079e-26	yes	up	66.61	70.74	70.62	17.22	15.56	18.01	69.3233	16.93
GPI	TRINITY_DN3447_c0_g1	Uncharacterized protein TCAP_04672 [Tolypocladium capitatum])	11.94	3.57769	6.73509e-22	9.71833e-21	yes	up	16.87	16.23	14.55	0.81	0.21	0.76	15.8833	0.593333
Chitinase 1	TRINITY_DN5488_c0_g1	Chitinase 1 [Fusarium oxysporum f. sp. cubense race 4])	12.229	3.61224	5.05635e-06	1.824e-05	yes	up	7.57	12.51	9.15	0.37	0.21	0.42	9.74333	0.333333
TF	TRINITY_DN1248_c0_g1	hypothetical protein G6O67_002789 [Ophiocordyceps sinensis])	5.452	2.4469	9.18383e-58	5.33384e-56	yes	up	56.97	57.79	49.8	4.06	4.48	5.13	54.8533	4.55667
	TRINITY_DN3620_c0_g1	Krueppel-like factor 11 [Tolypocladium ophioglossoides CBS 100239])	6.483	2.69657	6.03697e-48	2.66715e-46	yes	up	98.61	81.36	100.74	7.75	4.71	7.14	93.57	6.53333
	TRINITY_DN772_c0_g1	Uncharacterized protein TPAR_08616 [Tolypocladium paradoxum])	2.257	1.17429	6.03217e-43	2.25334e-41	yes	up	150.42	161.92	164.95	29.98	31.5	34.63	159.097	32.0367
	TRINITY_DN225_c0_g1	C6 transcription factor [Purpureocillium lilacinum])	2.27	1.18247	1.45494e-26	2.74537e-25	yes	up	63.76	68.2	61.93	16.87	13.58	17.38	64.63	15.9433
	TRINITY_DN3509_c0_g1	C6 transcription factor [Purpureocillium lilacinum])	4.339	2.11732	7.88342e-21	1.07366e-19	yes	up	13.82	17.42	17.75	2.27	1.49	1.35	16.33	1.70333
	TRINITY_DN1522_c0_g1	Zinc finger protein [Tolypocladium ophioglossoides CBS 100239])	2.175	1.12083	7.18004e-18	7.85111e-17	yes	up	124.49	123.21	108.51	28.1	22.35	25.04	118.737	25.1633
	TRINITY_DN919_c0_g1	pH-response transcription factor [Tolypocladium paradoxum])	2.014	1.01012	1.8053e-13	1.42698e-12	yes	up	63.13	57.44	58.24	15.63	12.1	12.52	59.6033	13.4167
	TRINITY_DN246_c1_g1	Nitrogen assimilation transcription factor nit-4 [Tolypocladium ophioglossoides CBS 100239])	2.345	1.22981	5.08457e-11	3.19672e-10	yes	up	95.81	86.9	76.78	21.1	15.31	15.78	86.4967	17.3967
	TRINITY_DN3399_c0_g1	fungal-specific transcription factor domain-containing protein [Aspergillus alliaceus])	2.37	1.24504	1.48144e-10	8.95066e-10	yes	up	19.45	21.4	18.29	4.72	3.18	3.49	19.7133	3.79667
	TRINITY_DN1938_c0_g3	Transcription factor spt8 [Tolypocladium ophioglossoides CBS 100239])	2.097	1.06803	2.81188e-05	9.13414e-05	yes	up	37.26	41.34	47.31	12.68	5.63	8.7	41.97	9.00333
	TRINITY_DN251_c0_g1	transcription factor RfeG [Purpureocillium lilacinum])	0.306	-1.70825	7.86386e-109	1.286e-106	yes	down	79.94	87.28	82.65	107.64	96.26	110.11	83.29	104.67
	TRINITY_DN1926_c0_g2	Transcriptional regulator CRZ1 [Tolypocladium paradoxum])	0.218	-2.195	1.46477e-38	4.83373e-37	yes	down	71.62	52.33	55	113.7	136.92	121.71	59.65	124.11
	TRINITY_DN1728_c0_g2	zinc finger transcription factor ace1 [Pochonia chlamydosporia 170])	0.417	-1.26132	4.71533e-32	1.19655e-30	yes	down	151.18	153.61	169.44	179.18	181.83	161.24	158.077	174.083
	TRINITY_DN898_c3_g1	Transcription factor CPH2 [Tolypocladium capitatum])	0.231	-2.11561	2.64039e-26	4.90673e-25	yes	down	5.57	6.58	5.89	12.75	11.46	10.32	6.01333	11.51
	TRINITY_DN2185_c0_g1	hypothetical protein G6O67_002715 [Ophiocordyceps sinensis])	0.483	-1.05096	1.09464e-20	1.46197e-19	yes	down	60.68	62.91	66.75	52.05	60.5	59.71	63.4467	57.42
	TRINITY_DN452_c0_g1	fungal transcriptional regulatory protein [Purpureocillium lilacinum])	0.386	-1.37441	4.50028e-12	3.14208e-11	yes	down	427.93	434.85	461.63	518.73	681.93	397.9	441.47	532.853

## Sheet: Table S6
Table S6. The information of all identified metabolites
ID	Metabolites	mz	rt	exact_mass	formula	Library	Class	Zn2+ stress_1	Zn2+ stress_2	Zn2+ stress_3	Zn2+ stress_4	Zn2+ stress_5	Control_1	Control_2	Control_3	Control_4	Control_5
M307T106	(-)-Epigallocatechin	307.082	105.939	306.074	C15H14O7	MoNA	Flavonoids	1.64074e+09	1.85598e+09	1.86103e+09	6.73489e+06	1.82686e+09	1.90406e+09	1.52771e+09	1.20608e+09	1.71246e+09	2.141e+09
M131T176	(-)-Isopiperitenone	131.09	175.531	150.105	C10H14O	MetaDNA	Organic oxides	4.67518e+07	1.99802e+07	5.64656e+07	4.87518e+07	1.77115e+07	4.71569e+07	2.87642e+07	6.81976e+07	6.15401e+07	3.75178e+07
M293T826	(2E,4Z,7Z,8E)-Colnelenic acid	293.211	825.633	292.204	C18H28O3	MetaDNA	Carboxylic acids and derivatives	1.98088e+06	2.38682e+06	1.21109e+06	725705	798868	1.0298e+07	3.36736e+06	3.20706e+06	3.36609e+06	2.9334e+06
M90T33	(2R,3R)-2,3-Butanediol	90.0917	32.8948	90.0681	C4H10O2	BioDeepDB	Alcohols and polyols	7.18645e+07	1.43515e+08	6.98052e+07	6.62345e+07	7.48137e+07	7.83708e+07	5.22259e+07	4.35404e+07	6.34655e+07	1.1893e+07
M273T332	(2R,3R)-3-Methylglutamyl-5-semialdehyde-N6-lysine	273.164	332.149	273.169	C12H23N3O4	MetaDNA	Unknow	2.62824e+07	2.97891e+07	3.13232e+07	1.97277e+07	2.39661e+07	1.78815e+07	2.12251e+08	2.38373e+08	2.26397e+08	3.00416e+08
M275T72	(2R,3R)-3-Methylornithinyl-N6-lysine	275.208	71.5806	274.2	C12H26N4O3	MetaDNA	Unknow	7.3984e+07	2.50623e+07	5.87241e+07	2.99356e+07	3.49768e+07	1.09867e+07	5.08537e+07	8.89568e+06	1.00278e+07	1.08322e+07
M185T78	(2R)-2-Hydroxy-3-(phosphonatooxy)propanoate	184.985	77.9955	185.993	C3H7O7P	BioDeepDB	Carbohydrates and carbohydrate conjugates	5.21489e+07	4.27136e+07	6.27558e+07	2.87546e+07	4.24328e+07	4.93118e+08	2.19092e+08	5.38882e+08	5.62858e+08	3.18493e+08
M190T149	(2S)-2-{[1-(R)-Carboxyethyl]amino}pentanoate	190.107	149.175	189.1	C8H15NO4	MetaDNA	Carboxylic acids and derivatives	8.33166e+07	9.89065e+07	2.75814e+08	3.64627e+07	7.62672e+07	5.85892e+07	4.30041e+07	6.77093e+07	3.80223e+07	4.32071e+07
M147T195	(3S,5S)-3,5-Diaminohexanoate	147.113	195.024	146.106	C6H14N2O2	MetaDNA	Carboxylic acids and derivatives	7.86148e+07	7.97026e+07	7.64804e+07	4.88896e+07	6.61778e+07	1.03164e+08	1.44004e+08	1.07692e+08	1.86082e+08	1.15138e+08
M277T138	(5-L-Glutamyl)-L-glutamate	277.103	137.619	276.096	C10H16N2O7	mzCloud	Carboxylic acids and derivatives	1.00376e+09	1.32305e+09	1.38564e+09	9.82844e+07	1.20828e+09	4.52962e+08	4.46968e+08	4.28182e+08	4.14755e+08	4.46938e+08
M279T784	(9Z,12Z,15Z)-Octadecatrienoic acid	279.231	783.887	278.225	C18H30O2	mzCloud	Fatty Acyls	1.87123e+07	2.16272e+07	3.02333e+07	6.21917e+06	8.50274e+06	8.75271e+06	5.93561e+06	1.84976e+07	5.21249e+06	5.18134e+06
M87T185	(R)-3-Hydroxybutyric acid	87.0445	184.945	104.047	C4H8O3	BioDeepDB	Hydroxy acids and derivatives	6.83079e+08	4.16363e+08	6.26848e+08	2.62578e+08	4.1352e+08	1.97845e+08	1.06807e+08	1.82837e+08	2.65556e+08	1.99507e+08
M151T467	(R)-mandelic Acid	151.039	466.574	152.047	C8H8O3	BioDeepDB	Benzene and substituted derivatives	712809	545960	1.73205e+07	1.5478e+07	513490	4.5287e+06	4.41093e+06	4.96624e+06	7.6044e+06	4.29358e+06
M123T587	(S)-1-Phenylethanol	123.04	587.301	122.073	C8H10O	BioDeepDB	Unknow	2.39347e+08	9.76679e+07	6.76174e+08	5.18305e+08	1.07054e+08	5.4238e+08	1.0522e+08	4.5617e+08	6.74941e+08	2.77416e+08
M240T762	(S)-2-Amino-3-(1H-indol-3-yl)propanamide hydrochloride	240.195	761.975	239.083	C11H14ClN3O	BioDeepDB	Unknow	3.12448e+07	2.81254e+07	2.63736e+07	2.51608e+07	2.84997e+07	2.65749e+07	2.88031e+07	2.75717e+07	2.65024e+07	2.7633e+07
M144T172	(S)-5-Amino-3-oxohexanoate	144.065	172.403	145.074	C6H11NO3	MetaDNA	Carboxylic acids and derivatives	6.19043e+07	5.45002e+06	1.158e+08	2.2529e+07	4.37661e+06	8.81499e+07	6.3683e+07	8.74916e+07	3.40168e+07	7.81247e+07
M162T123	(S)-Carnitine	162.112	123.22	161.105	C7H15NO3	mzCloud	Unknow	8.02546e+08	5.58765e+08	1.51704e+08	3.27323e+08	3.94322e+08	6.31426e+07	4.733e+07	4.86073e+07	4.30467e+07	5.07023e+07
M129T210	(S)-Piperidine-2-carboxamide	129.102	210.224	128.095	C6H12N2O	MetaDNA	Unknow	2.93501e+07	2.12344e+07	2.55179e+07	1.69507e+07	2.30616e+07	5.66847e+07	4.83997e+07	4.39982e+07	5.30307e+07	5.32966e+07
M239T794	[(2R)-2-Acetyloxy-3-carboxypropyl]-trimethylazanium;hydrochloride	239.128	793.706	240.1	C9H19ClNO4+	BioDeepDB	Unknow	2.40578e+07	2.81978e+07	3.25876e+07	7.14088e+07	2.96632e+07	4.91217e+07	7.73527e+07	1.32622e+07	1.40604e+07	1.27176e+07
M275T790	[8]-Shogaol	275.169	790.275	276.173	C17H24O3	BioDeepDB	Benzene and substituted derivatives	9.02247e+06	172869	494080	1.96299e+07	1.3668e+07	2.40179e+06	2.6264e+07	4.62813e+06	1.25942e+07	9.44555e+06
M160T132	1-Amino-1-deoxy-scyllo-inositol	160.06	131.801	179.079	C6H13NO5	MetaDNA	Organonitrogen compounds	8.98144e+07	1.75315e+06	6.4981e+07	1.04188e+08	1.53391e+06	1.35638e+07	5.51117e+06	1.67406e+07	3.24938e+07	5.04395e+06
M102T90	1-Aminocyclopropanecarboxylic acid	102.055	89.5348	101.048	C4H7NO2	BioDeepDB	Carboxylic acids and derivatives	1.16007e+08	1.21132e+08	7.20253e+07	1.45103e+08	1.1273e+08	1.90098e+08	3.12798e+08	3.29706e+08	3.29927e+08	2.09494e+08
M146T97_1	1-Deoxynojirimycin	146.081	96.644	163.084	C6H13NO4	BioDeepDB	Piperidines	1.50011e+08	1.50876e+08	1.35691e+08	1.53274e+08	1.27764e+08	5.94666e+08	2.79874e+08	5.77191e+08	2.86378e+08	3.00622e+08
M243T382	1-Hexadecanol	243.183	382.244	242.261	C16H34O	BioDeepDB	Fatty Acyls	2.70421e+08	1.5847e+08	1.71289e+08	1.27622e+08	1.54872e+08	8.53385e+07	1.04658e+08	1.08968e+08	1.04027e+08	8.9545e+07
M282T335	1-Methyladenosine	282.119	335.099	281.112	C11H15N5O4	BioDeepDB	Purine nucleosides	2.47948e+08	2.40807e+08	2.45721e+08	1.0146e+08	1.78647e+08	4.3224e+07	1.19775e+07	1.08599e+07	7.97379e+06	5.77752e+06
M298T208	1-Methylguanosine	298.114	207.523	297.267	C11H15N5O5	MoNA	Organooxygen compounds	3.30293e+07	3.18675e+07	1.96808e+07	2.43002e+07	3.73687e+07	2.29988e+06	3.68121e+06	1.79617e+06	1.94536e+06	2.43485e+06
M170T87	1-Methylhistidine	170.092	87.3502	169.085	C7H11N3O2	BioDeepDB	Carboxylic acids and derivatives	1.49646e+07	1.59006e+07	2.42883e+07	1.63124e+07	2.18761e+07	8.51634e+07	1.52371e+08	5.1558e+07	1.20264e+08	1.55944e+08
M114T98	1-Pyrroline-2-carboxylic acid	114.055	97.8664	113.048	C5H7NO2	MetaDNA	Azacyclic compounds	1.02942e+07	3.37216e+07	1.99925e+09	1.45968e+09	4.03156e+07	1.69293e+08	1.78206e+08	8.60194e+07	1.3979e+08	1.30841e+08
M114T223	1-Pyrroline-5-carboxylic acid	114.055	222.546	113.048	C5H7NO2	MetaDNA	Azacyclic compounds	8.3252e+07	7.60874e+07	7.7777e+07	7.24499e+07	7.93597e+07	1.67168e+08	1.6941e+08	1.58416e+08	1.37934e+08	1.76855e+08
M349T603	1,11,13-Trihydroxy-10-(hydroxymethyl)-3,6,6,14-tetramethyltricyclo[10.3.0.05,7]pentadeca-3,9-dien-2-one	349.201	603.019	350.209	C20H30O5	OTCML	Terpenoids	1.08277e+07	1.38419e+07	2.11506e+07	4.7974e+07	1.06338e+07	9.25708e+06	1.12759e+07	9.32891e+06	1.90218e+06	8.92925e+06
M126T195	1,2,3-Trihydroxybenzene	126.029	194.972	126.032	C6H6O3	mzCloud	Benzene and substituted derivatives	2.49537e+08	8.63367e+07	2.51864e+06	2.53225e+06	4.75138e+07	4.31436e+07	3.35207e+07	1.40055e+08	7.25678e+06	1.05783e+07
M111T94	1,3-Benzenediol	111.044	94.081	110.037	C6H6O2	BioDeepDB	Benzene and substituted derivatives	2.34619e+08	4.56821e+08	2.64796e+08	1.85596e+08	2.13508e+08	4.91783e+08	3.5468e+08	3.56718e+08	3.78162e+08	3.71514e+08
M163T531	1,5-Anhydro-D-glucitol	163.059	530.945	164.069	C6H12O5	mzCloud	Organooxygen compounds	1.53615e+07	1.2539e+07	8.15512e+07	6.75155e+07	1.13778e+07	1.96421e+07	1.5462e+08	6.02104e+07	1.27745e+08	5.08663e+07
M159T178	1,5-Naphthalenediamine	159.096	177.901	158.084	C10H10N2	mzCloud	Extractables/Leachables; Textile Chemicals/Auxiliary/Dyes; Industrial Chemicals	1.30251e+07	7.85384e+06	4.33441e+07	3.32562e+07	7.99323e+06	3.64631e+07	3.33746e+07	3.58014e+07	2.71719e+07	2.67306e+07
M187T621	10-Hydroxydecanoic acid	187.133	620.901	188.141	C10H20O3	BioDeepDB	Unknow	4.7527e+06	4.20114e+06	9.21104e+06	5.79567e+06	7.17766e+06	7.22308e+06	3.42038e+06	4.69142e+06	4.10458e+06	3.22591e+06
M351T781	11-Dehydro-thromboxane B2	351.216	780.774	368.22	C20H32O6	BioDeepDB	Fatty Acyls	1.5241e+07	1.68428e+07	1.69352e+07	1.61732e+06	1.14126e+07	1.16119e+07	1.77695e+07	1.00474e+07	9.03626e+06	1.09227e+07
M325T827_2	11-Dehydrocorticosterone	325.185	826.727	344.199	C21H28O4	BioDeepDB	Steroids and steroid derivatives	3.02694e+09	2.94481e+09	3.17645e+09	3.22481e+09	3.48402e+09	2.75623e+09	2.55993e+09	2.52375e+09	2.68004e+09	2.61798e+09
M215T776	12-Hydroxydodecanoic acid	215.009	775.817	216.173	C12H24O3	BioDeepDB	Hydroxy acids and derivatives	2.38147e+07	2.63359e+07	7.65093e+06	1.43216e+08	2.4358e+07	8.18706e+06	2.81401e+07	8.02825e+06	9.42816e+06	3.22326e+07
M333T779	12-Keto-leukotriene B4	333.207	778.992	334.214	C20H30O4	BioDeepDB	Fatty Acyls	2.46145e+08	5.29421e+08	4.07366e+08	3.67379e+08	4.62781e+08	1.36524e+08	2.63681e+08	1.79409e+08	2.24295e+08	2.0865e+08
M335T835	12-Keto-tetrahydro-leukotriene B4	335.224	834.691	336.23	C20H32O4	BioDeepDB	Fatty Acyls	2.04513e+07	6.95461e+07	8.14725e+06	2.58111e+07	2.87641e+07	7.9712e+06	2.05312e+07	2.73492e+07	1.73689e+07	3.34179e+06
M315T814	12,13-DHOME	315.252	813.728	314.246	C18H34O4	mzCloud	Fatty Acyls	73117.1	0	570251	200359	87154.1	312617	271668	196653	659733	763004
M295T806	13-L-Hydroperoxylinoleic acid	295.226	805.935	312.23	C18H32O4	BioDeepDB	Fatty Acyls	7.67897e+06	2.61391e+07	3.64516e+07	2.87823e+06	4.53147e+06	2.78148e+07	2.41221e+07	2.93223e+07	3.64882e+07	2.51796e+07
M279T814	13S-hydroxyoctadecadienoic acid	279.231	813.728	296.235	C18H32O3	BioDeepDB	Fatty Acyls	6.50281e+06	6.29122e+06	6.49932e+06	5.89893e+06	6.66842e+06	6.06162e+06	6.1045e+06	6.2948e+06	5.47614e+06	5.32828e+06
M174T202	1H-Indole-3-acetamide	174.076	201.794	174.079	C10H10N2O	BioDeepDB	Indoles and derivatives	843753	913724	3.97201e+06	2.82445e+06	3.68657e+06	3.71282e+07	3.50131e+07	4.70901e+07	4.05817e+07	3.35259e+07
M145T587	1H-Indole-3-carboxaldehyde	145.048	586.96	145.053	C9H7NO	MoNA	Indoles and derivatives	756629	789856	6.91531e+06	1.39383e+07	629416	1.02524e+06	3.16529e+06	1.0036e+06	2.09215e+07	976471
M178T99	2-Amino-2-deoxy-D-gluconate	178.071	98.6035	195.074	C6H13NO6	BioDeepDB	Unknow	2.4784e+07	1.08121e+07	1.14303e+07	3.85199e+07	1.38545e+07	2.44444e+07	5.64532e+07	2.34923e+07	2.4673e+07	2.68466e+07
M144T189	2-Amino-5-oxohexanoate	144.066	188.793	145.074	C6H11NO3	MetaDNA	Carboxylic acids and derivatives	6.78446e+07	1.2695e+07	1.78279e+08	1.25989e+08	4.84001e+07	1.5047e+08	1.51581e+08	1.66773e+08	2.5951e+08	1.45908e+08
M138T152	2-Aminobenzoic acid	138.055	152.178	137.048	C7H7NO2	BioDeepDB	Benzene and substituted derivatives	1.38373e+08	2.13771e+08	1.00055e+08	1.43305e+08	1.29903e+08	5.43692e+07	5.83913e+07	1.47634e+07	1.39452e+08	1.65624e+07
M110T152	2-Aminophenol	110.06	151.942	109.053	C6H7NO	mzCloud	Industrial Chemicals	1.21708e+08	9.73063e+07	1.02776e+08	1.05051e+08	8.47895e+07	3.25734e+08	2.10004e+08	2.11327e+08	1.749e+08	1.7067e+08
M198T388	2-Chloro-L-phenylalanine	198.032	388.068	199.04	C9H10ClNO2	BioDeepDB	Unknow	3.18032e+08	1.00267e+06	3.96238e+08	3.82152e+08	746453	2.77333e+08	3.45704e+08	3.41156e+08	4.06345e+08	3.57095e+08
M252T303	2-Deoxyadenosine	252.108	303.027	251.102	C10H13N5O3	BioDeepDB	Unknow	2.09464e+09	1.69549e+09	6.45355e+08	1.0698e+09	1.57373e+09	1.70995e+08	6.22096e+07	1.27451e+08	1.61634e+08	1.03982e+08
M269T179	2-Deoxyadenosine monohydrate	269.113	179.136	269.112	C10H15N5O4	BioDeepDB	Unknow	1.00123e+07	4.88494e+06	8.62815e+06	4.93707e+06	3.76664e+06	1.83726e+07	1.23566e+07	1.42822e+07	1.47651e+07	1.29556e+07
M111T80	2-Furoate	111.007	79.9546	112.016	C5H4O3	mzCloud	Furans	2.19821e+09	2.4232e+09	2.16661e+09	2.77677e+09	2.2211e+09	3.33043e+09	3.40947e+09	3.57202e+09	4.50711e+09	3.24336e+09
M114T80	2-Heptanone	114.103	80.3442	114.105	C7H14O	BioDeepDB	Organooxygen compounds	1.1009e+07	2.21142e+07	2.26993e+07	1.90752e+07	1.88875e+07	1.47944e+07	1.34766e+07	1.1614e+07	1.95667e+07	1.32044e+07
M162T307	2-Hydroxy-2-ethylsuccinic acid	162.055	307.069	162.053	C6H10O5	MetaDNA	Carboxylic acids and derivatives	8.11726e+06	7.94269e+06	6.69003e+06	1.0336e+07	1.02925e+07	4.42141e+06	3.80601e+06	2.65985e+06	3.35435e+06	3.98117e+06
M145T405	2-Hydroxyadipic acid	145.049	404.546	162.053	C6H10O5	MetaDNA	Carboxylic acids and derivatives	1.64306e+08	7.21475e+07	2.15787e+07	7.47575e+07	1.94075e+07	2.85839e+08	3.24432e+08	2.26192e+08	4.16622e+07	1.31767e+08
M191T482	2-Hydroxychromene-2-carboxylate	191.034	481.873	192.042	C10H8O4	MetaDNA	Benzopyrans	283612	1.97332e+06	368174	3.14998e+06	298936	394032	1.30524e+06	3.38568e+06	2.1302e+06	2.45284e+06
M102T146	2-Iminobutanoate	102.055	145.863	101.048	C4H7NO2	MetaDNA	Unknow	1.51488e+08	1.34477e+08	1.32194e+08	1.26355e+08	1.40301e+08	3.39609e+07	2.71416e+07	1.9157e+08	1.37876e+08	8.79484e+07
M176T185	2-Isopropylmalic acid	176.064	185.284	176.069	C7H12O5	BioDeepDB	Fatty Acyls	5.83671e+07	86442.5	4.17205e+06	1.74672e+06	94035.2	2.80149e+07	6.31027e+06	5.4796e+07	656297	3.42178e+06
M186T155	2-Keto-6-acetamidocaproate	186.076	155.253	187.084	C8H13NO4	MetaDNA	Carboxylic acids and derivatives	840809	745959	2.71818e+06	4.67393e+06	454866	1.03054e+06	4.54192e+06	1.19845e+06	2.87702e+06	1.06205e+06
M101T92	2-Ketobutyric acid	101.024	92.3892	102.032	C4H6O3	BioDeepDB	Keto acids and derivatives	2.15197e+08	2.47126e+08	3.96859e+08	2.11353e+08	1.97375e+08	1.99738e+08	2.76058e+08	2.57007e+08	2.88194e+08	2.76632e+08
M117T150	2-Methyl-3-hydroxybutyric acid	117.054	149.524	118.063	C5H10O3	mzCloud	Fatty Acyls	1.30242e+08	2.70537e+07	9.46004e+08	4.71196e+08	2.00764e+07	2.83151e+08	4.36456e+08	1.67679e+08	7.34639e+08	2.73024e+08
M145T101	2-Methylglutaric acid	145.05	101.126	146.141	C6H10O4	BioDeepDB	Fatty Acyls	6.58867e+07	1.80665e+07	4.15416e+07	1.97039e+08	1.0525e+07	2.14059e+07	1.93542e+07	4.40591e+07	6.47371e+07	2.15836e+07
M144T445	2-Naphthylamine	144.081	445.484	143.073	C10H9N	mzCloud	Naphthalenes	6.02731e+07	4.5212e+07	5.26587e+07	5.8991e+07	4.55752e+07	6.93808e+07	6.59845e+07	7.31396e+07	5.17799e+07	4.79553e+07
M267T85	2-O-(alpha-D-Mannosyl)-D-glycerate	267.072	84.8101	268.079	C9H16O9	MetaDNA	Carboxylic acids and derivatives	9.67503e+08	1.17506e+09	2.03504e+09	1.3153e+09	1.16922e+09	4.59947e+08	7.136e+08	4.83385e+08	7.80281e+08	5.31362e+08
M174T128	2-Oxoarginine	174.087	127.72	173.08	C6H11N3O3	MetaDNA	Carboxylic acids and derivatives	3.94628e+07	4.97178e+07	1.47512e+08	6.89719e+07	5.98212e+07	1.82067e+07	2.6362e+07	2.1204e+07	1.98419e+07	1.88784e+07
M136T173	2-Phenylacetamide	136.076	173.481	135.068	C8H9NO	MoNA	Benzene and substituted derivatives	1.95975e+07	2.02988e+07	4.1793e+07	3.51954e+07	1.57128e+07	3.24006e+07	3.11083e+07	2.94208e+07	2.57241e+07	2.6656e+07
M235T76	2-Propenoic acid, 2-(phosphonooxy)-, trisodium salt	234.961	75.5958	233.928	C3H2Na3O6P	BioDeepDB	Unknow	0	209362	289178	781432	0	538797	874382	1.21902e+06	0	0
M155T62	2,3-Butanediol	154.99	62.0821	154.012	C4H10O2S2	BioDeepDB	Organooxygen compounds	1.36077e+08	5.36544e+08	6.60923e+07	3.01532e+08	6.10846e+08	1.69225e+08	4.99178e+07	5.37355e+07	4.81377e+07	2.61853e+08
M304T103	2,3-Cyclic CMP	304.033	102.77	305.041	C9H12N3O7P	BioDeepDB	Unknow	4.59018e+06	0	0	3.38758e+07	16876.7	3.41527e+07	2.98134e+07	4.03221e+07	2.47913e+07	1.93238e+07
M181T541	2,6-Dihydroxy-4-methoxyacetophenone	181.05	541.223	182.058	C9H10O4	MoNA	Organooxygen compounds	2.30743e+06	1.49139e+06	1.3917e+06	1.14973e+06	767463	646298	880504	1.11586e+06	1.04509e+06	1.04948e+06
M147T148	2,6-Dihydroxypyridine hydrochloride	147.029	148.357	147.009	C5H6ClNO2	BioDeepDB	Unknow	5.09823e+08	5.25254e+08	1.09475e+08	1.95164e+08	5.29316e+08	1.16155e+09	9.66357e+08	8.93772e+08	1.12448e+09	8.83708e+08
M169T489	2,6-Dimethoxy-1,4-benzoquinone	169.049	488.648	168.042	C8H8O4	MoNA	Organooxygen compounds	4.02185e+06	3.56379e+06	3.62784e+06	3.5348e+06	2.79788e+06	1.32037e+06	4.71609e+06	1.32798e+06	1.68664e+06	1.14183e+06
M401T559	25-Hydroxycholesterol	401.087	558.779	402.35	C27H46O2	BioDeepDB	Steroids and steroid derivatives	20874.1	7458.65	385021	3.74398e+06	0	10485.4	17270.5	0	3.13536e+06	26801.6
M147T819	3-(2-Hydroxyphenyl)propanoic acid	146.965	818.889	166.063	C9H10O3	BioDeepDB	Phenylpropanoic acids	6.78639e+07	5.82067e+07	1.68856e+08	9.13331e+07	4.86934e+07	3.98515e+08	3.28899e+08	5.82085e+07	5.40146e+07	3.28082e+08
M154T103_1	3-Amino-4-hydroxybenzoate	154.05	102.784	153.043	C7H7NO3	BioDeepDB	Unknow	914401	0	553438	6.39879e+06	0	1.19593e+07	1.67621e+07	7.55447e+06	1.19281e+07	1.66679e+07
M104T151	3-Aminoisobutanoic acid	104.071	151.497	103.063	C4H9NO2	MoNA	Carboxylic acids and derivatives	2.68512e+08	2.65847e+08	1.30924e+09	1.2374e+09	2.40484e+08	6.1075e+08	8.53495e+07	5.66949e+08	6.14163e+08	6.23039e+08
M173T53	3-Carbamyl-1-methylpyridinium chloride	172.956	53.1287	172.04	C7H9ClN2O	BioDeepDB	Unknow	2.22555e+07	6.26305e+06	6.06312e+06	2.42422e+07	2.04691e+07	1.69598e+07	4.24182e+07	2.05458e+07	3.41057e+07	1.57412e+07
M172T53	3-Dehydroshikimate	171.993	53.1378	172.037	C7H8O5	BioDeepDB	Unknow	2.81683e+08	8.98269e+07	6.06979e+07	2.78425e+08	8.95756e+07	2.36498e+08	2.17515e+08	2.13195e+08	6.08715e+07	2.3776e+08
M153T236	3-Hydroxyanthranilic acid	153.041	235.561	153.043	C7H7NO3	BioDeepDB	Benzene and substituted derivatives	3.11215e+06	793684	2.62854e+06	3.77224e+06	685392	7.70598e+06	7.12392e+06	9.30147e+06	8.59951e+06	8.41231e+06
M137T186	3-Hydroxybenzoic acid	137.024	186.084	138.032	C7H6O3	BioDeepDB	Benzene and substituted derivatives	4.90519e+07	7.18515e+06	6.93414e+06	1.23175e+07	5.48314e+06	5.65447e+07	5.32813e+07	7.10131e+07	6.0549e+06	7.08959e+07
M123T205	3-Hydroxybenzyl alcohol glucoside	123.044	204.788	124.052	C7H8O2	MetaDNA	Benzene and substituted derivatives	1.70412e+07	896580	1.16386e+07	9.03871e+06	766471	3.21574e+06	2.33608e+06	1.72637e+06	2.25295e+06	1.23205e+06
M103T508	3-Hydroxybutyric acid	103.039	508.05	104.105	C4H8O3	MoNA	Organooxygen compounds	3.47245e+07	4.23129e+06	2.98174e+07	6.54679e+07	8.7761e+06	2.11583e+07	1.08216e+07	2.39412e+07	2.93548e+07	1.76606e+07
M163T260	3-Hydroxymethylglutaric acid	163.06	260.329	162.053	C6H10O5	BioDeepDB	Fatty Acyls	2.6059e+07	3.68597e+06	1.93426e+07	1.51933e+07	3.9937e+06	5.43657e+06	4.57702e+06	3.8239e+06	3.70036e+06	3.87743e+06
M151T417	3-Hydroxyphenylacetate	151.039	416.779	152.047	C8H8O3	mzCloud	Phenols	524462	1.24581e+07	2.99341e+06	9.24533e+06	913133	5.85442e+06	1.00504e+07	7.41804e+06	8.07943e+06	6.13797e+06
M156T199	3-Indoleacetonitrile	156.065	199.45	156.069	C10H8N2	BioDeepDB	Indoles and derivatives	6.55492e+06	1.68102e+07	1.66196e+08	4.00523e+07	2.16409e+07	1.06154e+08	6.40473e+07	5.63449e+07	5.17317e+07	8.14538e+06
M339T102	3-Ketolactose	339.093	102.264	340.101	C12H20O11	MetaDNA	Organic oxides	1.63923e+06	113170	1.05184e+07	9.86952e+06	0	3.26124e+06	3.60824e+06	5.48222e+06	6.44981e+06	3.31219e+06
M167T94	3-Methoxyanthranilate	167.055	94.4975	167.058	C8H9NO3	BioDeepDB	Benzene and substituted derivatives	1.0136e+07	7.34886e+06	4.64582e+07	6.35638e+07	5.741e+06	2.0091e+08	2.35967e+08	2.33158e+08	3.31999e+08	1.40358e+08
M113T339	3-Methyl-2-oxovaleric acid	113.06	339.112	130.063	C6H10O3	BioDeepDB	Keto acids and derivatives	1.10201e+08	1.19671e+08	1.45274e+07	4.99657e+07	7.36812e+07	7.33191e+06	3.85548e+06	6.13981e+06	3.19711e+06	3.62652e+06
M148T524	3-Methyloxindole	148.076	524.492	147.068	C9H9NO	BioDeepDB	Unknow	1.23904e+06	1.98905e+06	1.38084e+06	1.88877e+06	1.23662e+06	1.28972e+07	8.29083e+06	9.32529e+06	9.35789e+06	7.8004e+06
M120T812	3-Methylthiopropionic acid	119.945	812.483	120.025	C4H8O2S	BioDeepDB	Fatty Acyls	9.50349e+06	1.44859e+07	1.46327e+07	1.09444e+07	1.20756e+07	7.18179e+06	1.65035e+06	5.73934e+06	6.03859e+06	1.31778e+06
M165T330_1	3-Methylxanthine	165.042	330.3	166.049	C6H6N4O2	BioDeepDB	Imidazopyrimidines	679782	633935	1.90355e+06	2.19565e+06	626586	2.09074e+06	1.07317e+06	699309	916236	3.47995e+06
M212T321	3-O-Methyldopa Monohydrate	212.092	321.19	229.095	C10H15NO5	BioDeepDB	Unknow	1.35498e+07	2.10556e+07	1.81263e+07	1.54741e+07	1.49287e+07	1.35865e+08	9.69793e+07	1.55909e+08	1.62525e+08	1.34805e+08
M185T62	3,4-Dihydroxymandelic acid	184.984	61.6378	184.037	C8H8O5	BioDeepDB	Unknow	3.81227e+07	1.07719e+08	1.52162e+08	1.76429e+08	1.51932e+08	1.35569e+08	1.316e+08	1.7185e+08	1.51113e+08	1.41838e+08
M169T203	3,4-Dihydroxyphenylglycol	169.05	202.806	170.058	C8H10O4	BioDeepDB	Phenols	121229	77059.9	2.72346e+06	244870	28215.9	2.73267e+06	2.6865e+06	530240	3.17629e+06	2.54071e+06
M165T209	3,4-Dihydroxyphenylpropanoate	165.055	208.957	182.058	C9H10O4	mzCloud	Phenylpropanoic acids	4.04164e+09	3.58261e+09	3.39539e+09	2.11259e+09	3.36226e+09	1.64155e+09	1.07187e+09	1.63e+09	1.59255e+09	1.60563e+09
M233T179	4-(Glutamylamino) butanoate	233.113	178.755	232.106	C9H16N2O5	MetaDNA	Carboxylic acids and derivatives	4.72675e+06	4.15956e+06	5.06909e+06	3.56853e+06	4.48856e+06	2.00831e+08	1.02855e+08	1.7132e+08	1.65537e+08	1.06223e+08
M146T402	4-Acetamidobutanoic acid	146.059	402.247	145.074	C6H11NO3	BioDeepDB	Carboxylic acids and derivatives	9.85307e+08	7.15994e+08	6.79941e+08	3.565e+08	7.00673e+08	2.046e+08	1.06829e+08	2.18372e+08	1.9202e+08	1.85913e+08
M145T100	4-Guanidinobutanamide	145.106	99.756	144.101	C5H12N4O	MetaDNA	Carboximidic acids and derivatives	3.5508e+07	5.90323e+08	3.35901e+07	2.67261e+07	3.04275e+07	4.52536e+07	1.8579e+07	1.41786e+07	3.55277e+07	4.2501e+07
M146T103	4-Guanidinobutanoic acid	146.092	102.932	145.085	C5H11N3O2	BioDeepDB	Carboxylic acids and derivatives	1.51674e+08	1.02514e+08	3.29049e+08	1.40027e+08	9.71369e+07	1.6544e+08	1.19051e+08	1.5815e+08	1.47034e+08	1.32216e+08
M228T792	4-Hydroxy-3-methoxyphenylglycol hemipiperazinium salt	228.268	791.948	227.26	C9H12O4	BioDeepDB	Unknow	1.68996e+08	1.4312e+08	1.19235e+08	1.71012e+08	1.79763e+08	1.64463e+08	1.26938e+08	1.36653e+08	1.365e+08	1.20497e+08
M139T604	4-Hydroxybenzoic acid	139.017	604.381	138.032	C7H6O3	BioDeepDB	Benzene and substituted derivatives	3.43936e+09	2.12081e+09	1.50204e+09	7.88049e+08	4.34913e+08	7.05975e+09	4.49268e+08	1.44871e+09	8.44877e+08	8.56853e+08
M164T699	4-Hydroxycinnamic acid	164.066	699.098	164.047	C9H8O3	BioDeepDB	Cinnamic acids and derivatives	4.2228e+07	2.04051e+08	1.90115e+08	1.46627e+08	3.88178e+07	4.02416e+08	1.04881e+08	1.74266e+08	2.3431e+08	1.23295e+08
M179T626	4-Hydroxyphenylpyruvic acid	179.034	626.111	180.042	C9H8O4	MoNA	Benzene and substituted derivatives	545221	437073	482385	5.94522e+06	548316	500914	482970	477356	8.95105e+06	371300
M132T98	4-Hydroxyproline	132.065	98.4037	131.058	C5H9NO3	BioDeepDB	Carboxylic acids and derivatives	1.51008e+07	1.6598e+07	5.89258e+08	1.9809e+07	5.92109e+08	8.10612e+08	7.70047e+08	7.60616e+08	2.54826e+08	7.43164e+08
M125T153	4-Methylcatechol	125.061	153.441	124.052	C7H8O2	BioDeepDB	Phenols	1.26356e+08	9.89353e+07	1.24659e+08	7.67646e+07	1.06387e+08	6.7184e+07	6.69405e+07	6.36565e+07	7.33527e+07	7.0946e+07
M182T354	4-Pyridoxic acid	182.045	353.638	183.053	C8H9NO4	BioDeepDB	Pyridines and derivatives	1.6016e+07	143470	2.6596e+07	3.60565e+07	188672	5.87271e+06	7.20973e+06	5.85246e+06	1.70113e+07	6.94443e+06
M173T554	4-Quinolinecarboxylic acid	173.118	553.549	173.048	C10H7NO2	BioDeepDB	Unknow	769578	772554	6.31688e+06	1.05565e+07	669928	863850	945466	994023	1.10746e+07	864685
M159T225	4,5-Dihydroorotic acid	158.961	225.449	158.033	C5H6N2O4	BioDeepDB	Carboxylic acids and derivatives	2.38793e+08	3.36032e+08	1.23658e+08	3.71987e+08	1.63497e+08	3.22782e+07	3.67232e+07	2.01112e+08	3.64283e+07	1.49367e+08
M158T267	5-Acetamidovalerate	158.081	266.897	159.089	C7H13NO3	MetaDNA	Carboxylic acids and derivatives	3.93738e+07	2.13347e+06	1.14402e+08	9.55482e+07	1.41305e+06	2.88002e+08	3.97272e+08	3.51467e+08	3.71669e+08	2.63463e+08
M107T349	5-Aminoimidazole-4-carboxamide	107.035	349.166	126.054	C4H6N4O	MoNA	Azoles	4.73413e+07	59792.5	4.51038e+07	4.07546e+07	73015.1	6.63228e+06	896241	7.22232e+06	7.81413e+06	4.48103e+06
M116T124	5-Aminopentanoic acid	116.034	123.98	117.079	C5H11NO2	BioDeepDB	Carboxylic acids and derivatives	2.50128e+06	1.88131e+06	3.39929e+07	4.41166e+07	1.73636e+06	3.34341e+06	3.06709e+07	3.43515e+06	3.96126e+07	3.18096e+06
M219T349	5-Hydroxy-L-tryptophan	219.077	349.267	220.085	C11H12N2O3	BioDeepDB	Indoles and derivatives	2.17923e+07	391066	2.00471e+07	2.65099e+07	77600.1	1.43843e+07	1.54895e+07	1.5999e+07	1.93636e+07	2.10604e+07
M192T450	5-Hydroxyindoleacetic acid	192.065	450.392	191.058	C10H9NO3	BioDeepDB	Indoles and derivatives	1.20383e+07	7.05125e+06	6.62077e+06	6.74886e+06	2.61455e+06	3.67323e+07	1.31048e+07	3.4358e+07	2.86573e+07	3.27601e+07
M163T77	5-Hydroxylysine	163.108	77.3121	162.1	C6H14N2O3	MoNA	Carboxylic acids and derivatives	7.40012e+07	1.04758e+08	8.57557e+07	8.98872e+07	1.65896e+07	1.48081e+08	1.65401e+08	3.29835e+07	1.52263e+08	1.74657e+08
M127T275	5-Hydroxymethylfurfural	127.04	275.153	126.032	C6H6O3	OTCML	Unknow	4.53638e+08	1.09626e+07	3.1715e+08	7.78502e+07	3.61132e+08	3.32162e+09	1.02063e+07	1.20631e+07	9.34283e+06	7.65088e+06
M298T392_1	5-Methylthioadenosine	298.095	391.765	297.09	C11H15N5O3S	BioDeepDB	5'-deoxyribonucleosides	8.50257e+09	7.13737e+09	6.71921e+09	4.15755e+09	7.58105e+09	2.02847e+09	2.77131e+09	2.2847e+09	1.93795e+09	2.73252e+09
M321T791	5,6-DHET	321.242	790.867	338.246	C20H34O4	BioDeepDB	Fatty Acyls	1.64995e+07	1.45956e+07	3.13166e+07	8.78885e+06	1.46152e+07	9.24959e+06	2.12542e+06	1.10472e+07	3.23735e+06	1.28456e+07
M221T103	6-Acetyl-D-glucose	221.066	102.635	222.074	C8H14O7	MetaDNA	Carboxylic acids and derivatives	1.5684e+07	1.77507e+06	4.95296e+06	2.93937e+07	1.15827e+06	1.39246e+07	6.53974e+06	1.7569e+07	2.09257e+07	1.04048e+07
M413T401	6-Amino-6-deoxyfutalosine	413.139	400.59	413.134	C19H19N5O6	MetaDNA	Unknow	2.15641e+08	1.13845e+08	1.35126e+08	8.20334e+07	1.58125e+08	1.84362e+06	5.6502e+06	5.92715e+06	4.21892e+06	1.67956e+06
M131T306	6-Hydroxyhexanoic acid	131.07	305.918	132.079	C6H12O3	mzCloud	Hydroxy acids and derivatives	1.02601e+07	1.10719e+06	1.18765e+08	4.05443e+06	706011	8.87521e+06	9.52266e+06	9.93838e+06	1.57262e+07	1.21855e+07
M248T257	6-Hydroxymelatonin	248.114	256.574	248.116	C13H16N2O3	mzCloud	Indoles and derivatives	247924	133075	472245	663096	119617	8.39548e+06	5.60774e+06	1.00096e+07	7.76713e+06	4.81813e+06
M140T301	6-Hydroxynicotinic acid	140.034	301.066	139.027	C6H5NO3	BioDeepDB	Pyridines and derivatives	3.63294e+07	1.77942e+07	2.77289e+07	2.06511e+07	3.1659e+07	2.24085e+07	1.07892e+07	2.35451e+07	2.25704e+07	1.50738e+07
M148T365	6-Methyladenine	148.062	365.146	149.07	C6H7N5	MoNA	Imidazopyrimidines	428268	119558	499909	6.45923e+06	74951	1.36266e+07	1.52937e+07	1.79929e+07	1.79266e+07	1.60514e+07
M277T31	6-Phosphogluconic acid	276.898	30.9245	276.025	C6H13O10P	BioDeepDB	Organooxygen compounds	1.76197e+07	2.12795e+07	1.72582e+07	1.54047e+07	1.57364e+07	1.23522e+07	1.10611e+07	1.54481e+07	1.64276e+07	1.58088e+07
M166T166	7-Methylguanine	166.072	165.647	165.065	C6H7N5O	mzCloud	Imidazopyrimidines	9.15531e+07	6.15898e+07	7.27031e+07	4.2218e+07	7.27655e+07	2.64861e+07	9.67304e+06	3.5707e+07	8.51924e+07	1.05641e+07
M387T374	8-O-Acetylharpagide	387.132	373.614	406.148	C17H26O11	OTCML	Terpenoids	630691	578591	1.00024e+06	557517	544869	5.76168e+06	5.77732e+06	6.19621e+06	7.08098e+06	8.30653e+06
M321T808	8,9-DiHETrE	321.242	807.984	338.246	C20H34O4	BioDeepDB	Fatty Acyls	1.93647e+07	1.92761e+07	3.75995e+07	8.67867e+06	1.95343e+07	1.10036e+07	2.57082e+06	1.44175e+07	1.79675e+07	1.70842e+07
M215T135	87-51-4	215.009	135.112	215	Unknow	BioDeepDB	Unknow	8.48407e+06	7.15505e+06	7.68169e+06	3.51315e+07	2.12701e+07	3.19418e+07	7.81576e+06	8.76247e+06	2.94831e+07	7.27447e+06
M295T793	9-OxoODE	295.226	792.571	294.219	C18H30O3	BioDeepDB	Fatty Acyls	3.16649e+07	2.67545e+07	5.91848e+06	2.12421e+06	1.63618e+07	1.96514e+07	1.90036e+07	2.32292e+07	4.50582e+06	4.59733e+06
M312T723	9,10-12,13-Diepoxyoctadecanoate	312.226	723.47	312.23	C18H32O4	MetaDNA	Carboxylic acids and derivatives	360412	530454	1.51626e+06	90830.3	185382	2.4737e+06	1.1569e+06	1.07595e+07	2.86426e+07	9.41024e+06
M311T705	9,10,13-TriHOME	311.223	705.393	330.241	C18H34O5	MetaDNA	Carboxylic acids and derivatives	613701	681475	1.36301e+06	373874	366396	1.12412e+08	3.23264e+07	1.1451e+08	4.28489e+06	1.42485e+08
M311T812	9,12,13-TriHOME	311.223	812.314	330.241	C18H34O5	MetaDNA	Carboxylic acids and derivatives	2.62864e+08	4.32963e+08	3.90566e+08	1.33293e+08	2.39714e+08	2.92112e+08	4.46903e+08	4.68433e+08	3.61874e+08	2.75942e+08
M293T831	9(S)-HPODE	293.212	831.356	312.23	C18H32O4	BioDeepDB	Fatty Acyls	9.69561e+06	5.76754e+06	8.31823e+06	7.41716e+06	9.76414e+07	1.64718e+07	1.82609e+07	2.49513e+07	2.28662e+07	2.2187e+07
M151T37	Acetaminophen	151.061	36.7325	151.063	C8H9NO2	BioDeepDB	Phenols	1.70295e+08	3.7642e+07	9.03189e+07	2.18172e+08	1.00034e+08	2.18126e+07	8.71558e+07	1.10638e+08	9.57239e+07	1.23435e+08
M85T95	Acetoacetic acid	85.029	94.5763	102.032	C4H6O3	BioDeepDB	Keto acids and derivatives	1.76858e+07	4.10756e+07	4.61126e+07	4.61911e+07	4.88163e+07	1.02751e+08	1.00055e+08	1.34996e+08	8.86369e+07	9.6275e+07
M204T105	Acetylcarnitine	204.123	104.906	203.236	C9H17NO4	BioDeepDB	Carboxylic acids and derivatives	9.41337e+09	9.66097e+09	7.56556e+09	6.62595e+09	7.63422e+09	2.6641e+09	3.367e+09	2.5328e+09	2.58932e+09	2.58604e+09
M146T97_2	Acetylcholine	146.117	96.6361	146.118	C7H16NO2	MoNA	Organonitrogen compounds	1.56247e+10	1.73137e+10	1.70371e+10	1.12618e+10	1.72433e+10	2.36467e+09	5.21692e+09	2.14059e+09	2.49184e+09	4.31173e+09
M163T165	Acetylcysteine	163.123	164.668	163.03	C5H9NO3S	BioDeepDB	Carboxylic acids and derivatives	3.84254e+07	2.12251e+07	2.9361e+07	1.53647e+08	3.15697e+07	2.23038e+07	3.06785e+07	3.97191e+07	4.37735e+07	2.66484e+07
M116T92	Acetylglycine	116.034	92.0894	117.103	C4H7NO3	BioDeepDB	Carboxylic acids and derivatives	1.5321e+07	2.71284e+07	2.33989e+07	6.98587e+06	8.39105e+06	1.74399e+07	5.73471e+07	1.82187e+07	8.0185e+07	5.64976e+07
M134T349	Adenine	134.046	349.265	135.054	C5H5N5	BioDeepDB	Imidazopyrimidines	4.37734e+09	8.63984e+07	4.76248e+09	3.9802e+09	1.04442e+08	6.41372e+08	4.01779e+08	5.77793e+08	7.90904e+08	5.66141e+08
M268T286_1	Adenosine	268.104	286.303	267.097	C10H13N5O4	BioDeepDB	Purine nucleosides	1.20398e+11	1.08323e+11	1.03064e+11	6.88826e+10	9.99415e+10	2.30811e+10	1.28445e+10	1.94357e+10	2.06321e+10	1.67902e+10
M464T323	Adenylsuccinic acid	464.078	322.918	463.074	C14H18N5O11P	MoNA	Purine nucleotides	1.796e+08	1.01848e+08	2.28163e+08	1.04735e+08	1.25803e+08	5.12621e+08	5.70762e+08	2.41198e+08	2.53482e+08	1.82412e+08
M131T80	Agmatine	131.129	80.2436	130.122	C5H14N4	mzCloud	Organonitrogen compounds	1.33228e+07	2.33466e+07	4.61755e+07	4.10836e+07	4.44384e+07	6.09404e+07	1.18436e+08	9.30324e+07	8.00479e+07	1.77296e+08
M229T754_2	Agmatine sulfate	229.199	753.591	228.089	C5H16N4O4S	BioDeepDB	Unknow	1.30674e+08	1.33363e+08	1.26099e+08	1.13367e+08	1.18852e+08	1.23944e+08	1.22145e+08	1.22602e+08	1.20893e+08	1.16217e+08
M187T108	Alanyl-Proline	187.108	108.486	186.1	C8H14N2O3	mzCloud	Carboxylic acids and derivatives	1.01303e+07	1.84522e+07	1.39861e+07	2.12296e+07	1.31439e+07	1.10785e+08	1.77241e+07	2.06192e+07	2.03038e+07	2.55434e+07
M253T328	Alanyl-Tyrosine	253.119	327.733	252.111	C12H16N2O4	mzCloud	Carboxylic acids and derivatives	7.79889e+07	6.82563e+07	6.13385e+07	6.49539e+07	7.27948e+07	6.27113e+07	5.97575e+07	6.26443e+07	5.97715e+07	6.01069e+07
M300T449	all-trans-Retinoic acid	300.198	449.408	300.209	C20H28O2	BioDeepDB	Prenol lipids	7.66965e+07	1.04441e+08	1.16342e+08	9.69232e+07	6.45078e+07	7.90741e+07	9.92394e+07	4.27071e+07	4.9572e+07	8.13716e+07
M194T142	alpha-D-Galacturonic acid	194.048	142.108	194.043	C6H10O7	BioDeepDB	Unknow	3.53983e+07	2.11211e+08	2.31119e+08	1.33439e+08	1.32792e+08	1.19693e+08	1.47946e+08	1.26637e+08	1.3853e+08	2.40378e+08
M180T207	Alpha-D-Glucose	180.066	207.23	180.063	C6H12O6	BioDeepDB	Organooxygen compounds	7.04059e+07	6.45923e+06	1.12351e+08	5.34461e+07	6.1901e+06	6.50528e+07	5.6411e+07	7.88781e+07	7.43367e+07	6.44638e+07
M117T95	alpha-Ketoisovaleric acid	117.055	95.2039	116.047	C5H8O3	MetaDNA	Carboxylic acids and derivatives	3.02275e+08	3.07535e+08	2.48763e+08	2.3381e+08	2.88584e+08	1.00712e+08	6.96635e+07	8.78505e+07	8.14907e+07	6.72226e+07
M430T537	alpha-Tocopherol	430.241	536.736	430.381	C29H50O2	BioDeepDB	Prenol lipids	3.77675e+07	134701	135689	139240	3.40729e+07	8.92641e+07	6.83543e+07	1.03733e+07	7.27306e+06	7.60662e+07
M250T754	Alprenolol	250.178	754.114	249.173	C15H23NO2	mzCloud	Therapeutics/Prescription Drugs	2.98578e+08	3.58817e+08	3.06118e+08	2.5141e+08	2.85117e+08	3.44347e+08	3.20026e+08	3.46443e+08	3.80467e+08	3.30777e+08
M162T97	Aminoadipic acid	162.075	97.4617	161.069	C6H11NO4	BioDeepDB	Carboxylic acids and derivatives	9.42403e+09	5.95794e+09	4.60134e+09	5.4594e+09	6.96976e+09	3.3684e+09	3.12042e+09	2.95036e+09	3.1853e+09	3.26386e+09
M132T160	Aminocaproic acid	132.101	159.673	131.095	C6H13NO2	BioDeepDB	Fatty Acyls	4.2767e+07	4.28227e+07	1.9663e+08	1.69665e+08	3.58252e+07	3.00178e+08	2.00818e+08	5.15873e+07	2.18503e+08	1.96188e+08
M348T144	AMP	348.07	143.558	347.063	C10H14N5O7P	mzCloud	Purine nucleotides	4.98822e+07	2.37421e+07	3.18806e+07	2.21813e+07	3.11899e+07	3.38553e+09	2.67149e+09	2.95302e+09	2.73571e+09	2.9939e+09
M145T838	Anabasine	144.982	837.871	162.116	C10H14N2	BioDeepDB	Unknow	6.48912e+07	9.44315e+07	9.23673e+07	5.27704e+07	6.80523e+07	1.8038e+08	6.12351e+07	7.55377e+07	6.31264e+07	6.98513e+07
M331T776	Andrographolide	331.191	776.438	350.209	C20H30O5	OTCML	Terpenoids	2.31079e+07	3.49502e+07	2.42506e+07	3.14988e+07	3.18841e+07	7.74103e+06	1.50481e+07	1.178e+07	1.18867e+07	1.08968e+07
M353T708	Anileridine	353.229	708.054	352.215	C22H28N2O2	mzCloud	Therapeutics/Prescription Drugs; Drugs of Abuse/Illegal Drugs	1.83428e+07	1.2437e+07	2.49123e+07	4.46685e+06	8.63193e+06	1.64536e+07	1.35042e+07	1.51371e+07	1.59042e+07	1.11886e+07
M311T806_2	Arachidic acid	311.169	806.185	312.303	C20H40O2	BioDeepDB	Fatty Acyls	2.47255e+09	3.03462e+09	3.03041e+09	3.03121e+09	3.12668e+09	2.61416e+09	2.57301e+09	2.53094e+09	2.74973e+09	2.55555e+09
M272T100	Arbutin	272.087	99.969	272.09	C12H16O7	MetaDNA	Benzene and substituted derivatives	2.34648e+07	2.04112e+07	2.9076e+07	2.63394e+07	2.17812e+07	5.85016e+07	2.25617e+07	4.79639e+07	1.08145e+07	1.96195e+07
M209T344	Arginine hydrochloride	209.045	343.604	210.662	C6H14N4O2.HCl	BioDeepDB	Unknow	1.99756e+08	8.41134e+06	1.16073e+08	2.42655e+08	2.34256e+07	1.79258e+08	1.73014e+08	9.98336e+07	1.21035e+08	1.81131e+08
M291T149	Argininosuccinic acid	291.138	148.62	290.123	C10H18N4O6	MetaDNA	Carboxylic acids and derivatives	5.27325e+07	4.1133e+07	4.20474e+07	2.65974e+07	4.68606e+07	4.4534e+07	4.50135e+07	4.393e+07	4.83058e+07	5.05108e+07
M316T97	Aspartylglycosamine	316.114	97.45	335.133	C12H21N3O8	MetaDNA	Carboximidic acids and derivatives	6.29891e+07	6.20407e+07	1.04016e+07	7.55392e+07	4.31067e+06	2.61358e+08	1.6305e+08	2.22937e+08	2.93111e+08	1.99427e+08
M203T95	Asymmetric dimethylarginine	203.15	95.3853	202.143	C8H18N4O2	MoNA	Carboxylic acids and derivatives	4.70533e+09	3.90776e+09	4.33201e+09	3.46742e+09	4.02774e+09	1.11704e+09	1.57662e+09	9.63837e+08	1.31299e+09	1.57106e+09
M215T388	Atractylenolide II	215.139	387.991	232.146	C15H20O2	OTCML	Terpenoids	9.82293e+07	1.01274e+08	1.82001e+07	4.04098e+07	9.03761e+07	1.93067e+08	1.65603e+08	1.82882e+08	1.76775e+08	1.40044e+08
M187T380	Azelaic acid	187.098	379.743	188.105	C9H16O4	BioDeepDB	Fatty Acyls	4.84604e+06	1.07899e+06	6.35669e+06	3.31055e+06	914371	8.36956e+06	8.40764e+06	7.30276e+06	2.35629e+06	7.41844e+06
M270T90	Bacilysin	270.119	89.8933	270.122	C12H18N2O5	MetaDNA	Unknow	1.3575e+08	1.65265e+08	1.76636e+08	1.6002e+08	8.1723e+07	1.08957e+08	6.68647e+07	1.14998e+08	1.93256e+08	7.75988e+07
M107T369	Benzaldehyde	107.049	368.82	106.042	C7H6O	BioDeepDB	Benzene and substituted derivatives	1.8691e+06	1.22359e+06	1.49022e+06	2.21392e+07	1.53341e+06	3.27493e+06	3.54088e+06	2.23061e+06	3.50276e+06	2.51543e+06
M123T209	Benzoic acid	123.044	209.331	122.037	C7H6O2	OTCML	Unknow	1.93292e+09	1.73085e+09	1.64046e+09	1.04043e+09	1.64661e+09	8.01208e+08	5.33665e+08	7.62304e+08	7.60419e+08	7.72057e+08
M89T716	beta-Alanine	89.0226	716.209	89.0477	C3H7NO2	BioDeepDB	Carboxylic acids and derivatives	6.57675e+07	2.1629e+08	2.46779e+08	9.9557e+07	2.04778e+08	2.11173e+08	1.61544e+08	3.80455e+07	1.61205e+08	7.88604e+07
M246T88	beta-Alanyl-L-arginine	246.156	87.6088	245.149	C9H19N5O3	MetaDNA	Carboxylic acids and derivatives	1.21816e+07	1.01647e+07	9.21091e+06	1.74746e+07	1.80094e+07	9.84136e+06	8.26987e+06	9.04734e+06	1.08371e+07	1.28116e+07
M218T78	beta-Alanyl-L-lysine	218.15	78.3087	217.143	C9H19N3O3	MoNA	Peptidomimetics	1.87464e+07	1.11182e+07	4.29878e+07	3.8593e+07	4.17362e+07	3.50293e+06	3.70977e+06	3.23755e+06	5.1107e+06	4.34585e+06
M322T163	beta-Citryl-L-glutamate	322.077	163.119	321.07	C11H15NO10	MetaDNA	Unknow	9.72311e+07	8.82084e+07	8.72343e+07	1.76082e+07	8.01065e+07	1.95238e+08	9.33833e+07	1.1333e+08	9.70073e+07	8.3826e+07
M259T80	beta-D-Fructose 6-phosphate	259.022	80.1329	260.03	C6H13O9P	mzCloud	Organooxygen compounds	2.19317e+08	2.54878e+08	2.76715e+08	2.08817e+08	2.03853e+08	3.0827e+08	3.499e+08	3.41631e+08	3.96684e+08	3.77846e+08
M171T82	Beta-Glycerophosphoric acid	171.005	82.3529	172.014	C3H9O6P	MoNA	Glycerophospholipids	1.88271e+08	1.98015e+08	3.12356e+08	1.90047e+08	1.78784e+08	2.16359e+07	1.78591e+07	1.85155e+07	2.4813e+07	1.88881e+07
M132T402	Beta-Guanidinopropionic acid	132.081	402.194	131.07	C4H9N3O2	BioDeepDB	Organonitrogen compounds	3.58761e+08	2.68353e+08	2.51829e+08	1.34049e+08	2.55434e+08	7.07592e+07	4.06554e+07	8.01458e+07	6.76392e+07	6.62581e+07
M130T225	Beta-Leucine	130.086	225.205	131.095	C6H13NO2	BioDeepDB	Carboxylic acids and derivatives	3.16883e+08	8.76959e+07	1.03807e+08	3.9118e+08	5.48799e+07	8.42143e+07	2.45968e+08	5.95972e+08	4.83601e+08	5.15956e+08
M118T92_3	Betaine	118.122	92.3213	117.079	C5H11NO2	BioDeepDB	Carboxylic acids and derivatives	2.70645e+08	2.40749e+08	2.62929e+08	2.00948e+08	2.39816e+08	1.80054e+08	1.89905e+08	1.81215e+08	1.59154e+08	1.48552e+08
M102T412	Betaine aldehyde	102.092	411.71	102.092	C5H12NO	MoNA	Organonitrogen compounds	1.76445e+07	1.35698e+07	1.69235e+07	6.9642e+06	1.00121e+07	2.08494e+07	1.13252e+07	8.80613e+06	9.43585e+06	1.07617e+07
M160T143	Betonicine	160.097	143.301	159.089	C7H13NO3	MoNA	Carboxylic acids and derivatives	2.16143e+07	1.39602e+07	2.87768e+07	2.12732e+07	2.11459e+07	7.45332e+07	1.69813e+07	1.21424e+07	1.64112e+07	1.38763e+07
M227T606	Biotin	227.081	605.871	244.088	C10H16N2O3S	BioDeepDB	Biotin and derivatives	1.52245e+08	1.25011e+08	1.11575e+08	6.25777e+07	1.17299e+08	5.26302e+07	6.75299e+07	5.45935e+07	5.0946e+07	6.42208e+07
M279T826	Bovinic acid	279.233	825.894	280.24	C18H32O2	BioDeepDB	Fatty Acyls	1.90475e+08	2.2033e+07	2.39268e+06	1.69109e+08	6.10903e+07	9.15371e+06	1.30878e+07	5.68583e+07	1.3025e+07	1.79244e+07
M102T66	Cadaverine	102.115	65.853	102.116	C5H14N2	BioDeepDB	Organonitrogen compounds	6.27544e+07	3.34856e+07	5.77246e+07	4.91843e+07	9.39006e+07	2.6996e+08	2.16636e+08	4.46353e+08	4.34938e+08	2.87874e+08
M194T231	Caffeine	194.081	230.69	194.08	C8H10N4O2	OTCML	Unknow	1.29716e+07	1.87352e+07	1.5818e+07	1.91439e+07	9.48849e+06	6.03667e+07	1.04416e+08	1.13333e+08	7.79939e+07	8.69472e+07
M330T838	Calcium 2-(trimethylammonio)ethyl phosphate chloride tetrahydrate	330.336	837.869	329.032	C5H21CaClNO8P	BioDeepDB	Unknow	8.14183e+06	8.76045e+06	1.74967e+07	2.40564e+07	1.29563e+07	4.66731e+06	4.38529e+06	1.25406e+08	2.41623e+07	1.05837e+08
M219T650	Capsidiol	219.174	649.865	236.178	C15H24O2	BioDeepDB	Prenol lipids	545897	201944	120801	94905.6	100643	7.81031e+06	22064	1.82429e+07	133544	0
M263T511	Carbadox	263.081	511.332	262.07	C11H10N4O4	mzCloud	Naphthyridines	5.54461e+07	983825	4.52451e+07	3.2502e+07	4.0686e+07	5.1026e+07	3.28679e+07	5.49526e+07	4.50996e+07	3.87065e+07
M227T178	Carbidopa	227.102	177.841	226.095	C10H14N2O4	OTCML	Unknow	2.18303e+08	1.6731e+08	1.83387e+08	3.18609e+07	1.71205e+08	4.2926e+08	6.80103e+07	1.64396e+08	1.56832e+08	4.06646e+08
M225T91	Carnosine	225.099	90.8637	226.107	C9H14N4O3	BioDeepDB	Peptidomimetics	4.25345e+07	1.02691e+07	2.70226e+07	2.88985e+07	7.20337e+06	4.73793e+07	3.01732e+07	4.92791e+07	6.28098e+07	5.17045e+07
M325T95	Cellobiose	325.112	94.7868	342.116	C12H22O11	BioDeepDB	Unknow	4.9782e+07	9.52501e+07	1.0331e+08	5.99565e+07	6.92636e+07	2.1151e+08	2.43113e+08	1.76456e+08	2.22721e+08	2.61327e+08
M393T779	Chenodeoxycholic acid	393.311	779.395	392.293	C24H40O4	BioDeepDB	Steroids and steroid derivatives	724781	697600	599545	499432	3.75501e+06	896563	158992	213642	595507	335474
M169T495	Chlorzoxazone	168.989	494.568	168.993	C7H4ClNO2	BioDeepDB	Benzoxazoles	1.49462e+07	2.14063e+06	6.91078e+06	1.07226e+08	1.85609e+06	3.83988e+06	1.92087e+07	1.40449e+07	2.55037e+07	1.89839e+07
M104T155	Choline	104.107	155.089	104.108	C5H14NO	MoNA	Organonitrogen compounds	4.617e+08	4.03176e+08	4.47348e+08	3.09145e+08	3.72786e+08	5.9832e+07	7.2776e+07	1.32266e+08	5.17038e+07	9.27608e+07
M184T94_1	Choline sulfate	184.064	94.081	183.056	C5H13NO4S	MetaDNA	Organic oxides	6.06056e+09	6.24358e+09	5.44963e+09	6.53158e+09	5.93766e+09	1.17565e+09	1.84471e+09	1.15991e+09	1.40846e+09	1.75972e+09
M126T573	Ciliatine	125.986	572.626	125.024	C2H8NO3P	BioDeepDB	Organic phosphonic acids and derivatives	7.36656e+08	8.37298e+08	7.90112e+08	2.51019e+08	8.5513e+07	8.84938e+07	8.33055e+07	5.09884e+08	2.97086e+08	8.32746e+08
M132T89	cis-4-Hydroxy-D-proline	132.065	88.6978	131.058	C5H9NO3	BioDeepDB	Carboxylic acids and derivatives	1.27854e+08	9.19332e+07	6.69254e+07	8.20634e+07	9.58639e+07	1.01474e+09	1.22655e+09	9.41748e+08	1.07727e+09	1.15167e+09
M132T92	cis-4-Hydroxy-L-proline	132.102	91.863	131.058	C5H9NO3	BioDeepDB	Unknow	5.36641e+08	5.48248e+08	1.24532e+08	3.98419e+08	4.86576e+08	3.30347e+08	2.90272e+08	3.28781e+08	2.82815e+08	2.993e+08
M175T148	cis-Aconitic acid	175.024	148.29	174.016	C6H6O6	MetaDNA	Carboxylic acids and derivatives	1.08555e+08	4.89257e+08	4.52796e+08	1.53147e+08	4.90423e+08	8.79112e+08	6.88896e+08	7.63386e+08	8.1801e+08	6.62526e+08
M307T710	Citalopram	307.151	709.51	324.164	C20H21FN2O	MoNA	Benzene and substituted derivatives	1.11568e+07	8.35518e+06	2.0476e+07	1.50333e+06	8.34896e+06	1.01563e+07	729081	1.08714e+07	1.04947e+07	1.28691e+06
M129T487	Citraconic acid	129.018	486.943	130.027	C5H6O4	BioDeepDB	Fatty Acyls	4.09076e+06	4.89589e+06	1.97461e+07	2.70561e+07	4.0114e+06	6.40204e+06	7.2405e+06	1.25458e+07	2.97338e+07	1.11182e+07
M147T82	Citramalic acid	147.029	81.8707	148.037	C5H8O5	MoNA	Fatty Acyls	7.48221e+08	5.50371e+08	8.07657e+08	5.9751e+08	6.51201e+08	4.29986e+08	3.26151e+08	4.72613e+08	5.98793e+08	3.71332e+08
M191T80_1	Citric acid	190.948	79.8752	192.027	C6H8O7	BioDeepDB	Carboxylic acids and derivatives	4.8272e+07	8.08119e+07	2.13118e+07	9.26351e+07	6.82058e+07	8.17791e+07	1.60381e+08	7.29421e+07	1.45376e+08	3.91977e+07
M176T90	Citrulline	176.103	89.7634	175.096	C6H13N3O3	BioDeepDB	Carboxylic acids and derivatives	1.32753e+07	8.61331e+07	6.92102e+07	5.40878e+07	4.33813e+07	5.03716e+07	4.48137e+07	8.00106e+07	5.58486e+07	7.50774e+07
M324T102	CMP	324.058	101.866	323.052	C9H14N3O8P	BioDeepDB	Pyrimidine nucleotides	2.10717e+08	1.96537e+08	1.89401e+08	2.65403e+08	1.99986e+08	6.56274e+07	3.22432e+07	5.23996e+07	4.08039e+07	5.14967e+07
M341T155	Coniferin	341.12	154.73	342.132	C16H22O8	MoNA	Carbohydrates and carbohydrate conjugates	2.7947e+07	773936	3.19719e+07	3.92243e+07	567464	6.54621e+07	4.97212e+07	2.38217e+08	5.0214e+07	5.22638e+07
M328T814	Corchorifatty acid F	328.221	813.986	328.444	C18H32O5	mzCloud	Fatty Acyls	606718	734292	1.29078e+06	606962	733483	855218	588009	737547	549000	802765
M132T96	Creatine	132.077	96.4246	131.07	C4H9N3O2	BioDeepDB	Carboxylic acids and derivatives	7.83878e+08	3.27998e+08	4.7028e+08	3.11599e+08	5.16476e+08	4.34163e+08	3.16678e+08	3.91835e+08	4.15657e+08	3.80904e+08
M113T124	Creatinine	112.984	123.939	113.059	C4H7N3O	BioDeepDB	Carboxylic acids and derivatives	3.74079e+07	4.92252e+06	1.029e+08	2.88344e+08	4.87154e+06	3.56522e+07	7.21169e+07	7.47491e+06	1.2256e+07	2.99669e+07
M328T322	Cyclic AMP	328.043	322.498	329.053	C10H12N5O6P	BioDeepDB	Purine nucleotides	9.09018e+06	0	1.24623e+07	1.25707e+07	0	3.22697e+07	6.11237e+06	2.79982e+07	2.12331e+07	5.11399e+06
M346T772	Cyclic GMP	346.331	771.647	345.047	C10H12N5O7P	BioDeepDB	Purine nucleotides	9.76143e+07	5.17377e+07	7.90178e+07	9.37704e+07	8.86208e+07	3.65155e+07	4.1976e+07	3.98444e+07	3.55602e+07	4.46781e+06
M161T75	Cysteinylglycine	161.029	74.6643	178.041	C5H10N2O3S	MetaDNA	Carboxylic acids and derivatives	6.37605e+07	5.69986e+07	6.96918e+07	8.76692e+07	7.42332e+07	1.06726e+08	8.7354e+07	5.75068e+07	4.91506e+07	7.1109e+07
M244T103	Cytidine	244.093	102.516	243.085	C9H13N3O5	BioDeepDB	Unknow	1.8248e+08	1.49179e+08	9.88382e+07	2.91665e+08	1.83315e+08	3.22341e+07	1.32588e+08	3.24976e+07	3.07712e+07	1.59678e+07
M615T145	Cytidine monophosphate N-acetylneuraminic acid	615.162	145.235	614.147	C20H31N4O16P	MetaDNA	Azacyclic compounds	3.77526e+07	1.13264e+07	1.7613e+06	124755	1.37763e+07	1.79208e+07	219028	540298	0	813512
M112T243	Cytosine	112.051	243.022	111.043	C4H5N3O	MoNA	Diazines	1.36766e+07	1.45266e+07	1.26383e+07	5.08856e+07	1.02488e+07	2.95706e+07	2.22353e+07	4.06934e+07	1.81307e+07	7.98583e+07
M230T737	D-(-)-3-Phosphoglyceric acid disodium salt	230.247	736.782	229.957	C3H5Na2O7P	BioDeepDB	Unknow	7.64439e+07	4.65031e+07	4.57215e+07	1.26922e+08	6.18606e+07	6.86936e+07	4.34538e+07	4.91975e+07	4.51319e+07	5.95862e+07
M360T114	D-(+)-Maltose monohydrate	360.149	113.973	360.127	C12H24O12	BioDeepDB	Unknow	1.62846e+08	1.79274e+08	2.51177e+08	7.69458e+07	1.12161e+08	2.14971e+08	2.66979e+08	2.05174e+08	2.19743e+08	6.67525e+07
M159T89	D-Alanyl-D-alanine	159.076	88.8277	160.085	C6H12N2O3	BioDeepDB	Carboxylic acids and derivatives	5.49806e+06	2.08779e+08	1.59473e+08	3.46116e+06	1.64492e+08	4.1931e+06	1.70387e+07	9.86443e+06	1.77294e+07	1.41934e+07
M104T334	D-alpha-Aminobutyric acid	104.071	333.901	103.063	C4H9NO2	MoNA	Carboxylic acids and derivatives	3.10558e+08	5.02072e+08	9.11071e+07	6.49186e+08	3.75306e+08	3.64017e+07	1.58755e+08	1.73105e+08	1.85574e+08	1.45501e+08
M131T198	D-Arabinose	131.034	198.325	150.053	C5H10O5	BioDeepDB	Unknow	6.92455e+06	5.85516e+06	8.34291e+06	2.80801e+07	7.23761e+07	1.97399e+07	1.31725e+07	1.20684e+07	1.95256e+07	1.2554e+07
M153T95	D-Arabitol	153.075	95.4697	152.069	C5H12O5	BioDeepDB	Organooxygen compounds	8.36293e+08	5.95157e+08	5.739e+08	5.21599e+08	1.57938e+08	8.04867e+07	3.60385e+07	6.96056e+07	5.57038e+07	3.23648e+07
M164T440	D-beta-Phenylalanine	164.07	440.177	165.079	C9H11NO2	MetaDNA	Unknow	5.43353e+07	6.81916e+07	6.28833e+07	7.19075e+07	5.80818e+07	1.7403e+07	2.232e+07	2.78178e+07	3.80771e+07	2.11109e+07
M134T359	D-Cathine	134.096	358.688	151.1	C9H13NO	mzCloud	Drugs of Abuse/Illegal Drugs; Sports Doping Drugs; Endogenous Metabolites; Therapeutics/Prescription Drugs	9.5283e+08	9.30492e+08	9.80134e+08	6.96926e+08	9.64367e+08	7.071e+08	7.69426e+08	7.32377e+08	5.85498e+08	5.83116e+08
M161T702	D-Fructose	161.044	702.378	180.063	C6H12O6	MoNA	Organooxygen compounds	1.71852e+07	1.30832e+07	8.54307e+07	1.68171e+08	2.09022e+06	1.13542e+07	9.86834e+06	1.46915e+07	5.23129e+07	5.11683e+06
M180T373	D-Galactose	180.066	373.097	180.063	C6H12O6	mzCloud	Endogenous Metabolites	1.4187e+06	911962	2.45268e+06	2.49814e+06	809852	6.8466e+06	7.49827e+06	8.05142e+06	2.41117e+07	6.46595e+06
M180T305	D-Glucose	180.066	305.088	180.063	C6H12O6	MoNA	Organooxygen compounds	1.06882e+07	6.68347e+06	1.66927e+07	1.7271e+07	5.96697e+06	1.35067e+07	1.69131e+07	1.38033e+07	1.93643e+07	2.08486e+07
M241T87	D-Glucose 1-phosphate	241.012	87.2875	260.03	C6H13O9P	mzCloud	Organooxygen compounds	7.84942e+07	1.01392e+08	1.43087e+08	9.23889e+07	6.8085e+07	7.84206e+07	1.14545e+08	9.51102e+07	1.20221e+08	9.44816e+07
M234T174	D-Glucuronic acid sodium salt hydrate	234.099	173.682	234.035	C6H11NaO8	BioDeepDB	Unknow	1.6961e+06	2.22337e+06	1.65942e+06	3.11523e+06	1.64689e+06	1.04542e+07	3.54025e+06	4.42144e+06	4.35297e+06	3.34887e+06
M211T90	D-Glycero-D-galacto-heptitol	211.082	90.3202	212.09	C7H16O7	MoNA	Organooxygen compounds	2.96467e+08	2.93204e+08	3.8467e+08	4.12329e+08	9.25054e+07	1.30211e+08	1.40397e+08	1.70771e+08	2.03996e+08	1.54612e+08
M177T101_1	D-Gulono-1,4-lactone	177.039	100.602	178.048	C6H10O6	BioDeepDB	Unknow	3.57013e+07	2.92117e+07	1.61638e+07	1.54243e+08	5.20795e+07	4.73387e+07	4.46994e+07	5.32584e+07	7.8956e+07	4.21693e+07
M161T103	D-Hamamelose	161.044	102.797	180.063	C6H12O6	MetaDNA	Organic oxides	1.23376e+08	1.52663e+07	2.93113e+08	4.66521e+07	1.4939e+07	1.40495e+08	1.93595e+08	2.01619e+08	2.23741e+08	1.32583e+08
M201T71	D-Lysopine	201.123	70.7534	218.127	C9H18N2O4	MetaDNA	Carboxylic acids and derivatives	6.70683e+07	6.30745e+07	8.8532e+07	6.71187e+07	6.51048e+07	1.91923e+08	6.95103e+07	4.8225e+07	6.5235e+07	5.0871e+07
M150T203	D-Lyxose	150.077	202.908	150.053	C5H10O5	BioDeepDB	Unknow	4.58948e+06	3.87389e+06	4.8881e+06	1.19943e+07	3.77239e+06	7.45366e+07	7.72751e+07	8.25412e+07	6.54593e+07	2.16275e+07
M196T334	D-Mannonate	196.061	334.5	196.058	C6H12O7	MetaDNA	Carboxylic acids and derivatives	1.02753e+07	286248	1.04063e+07	1.83336e+07	248071	5.05073e+07	3.10434e+07	6.71867e+07	5.46401e+07	3.59431e+07
M179T86	D-Mannose	179.054	85.8409	180.063	C6H12O6	BioDeepDB	Organooxygen compounds	1.3767e+09	1.07089e+09	2.29148e+09	1.83123e+09	1.05625e+09	1.11297e+09	9.50087e+08	1.29731e+09	1.4745e+09	1.06078e+09
M245T93	D-Octopine	245.125	93.0479	246.133	C9H18N4O4	MetaDNA	Carboxylic acids and derivatives	1.08089e+07	1.27439e+07	8.4682e+06	4.11031e+07	1.2916e+07	1.56309e+07	1.37983e+07	1.74368e+07	1.1355e+08	1.43597e+07
M180T123	D-Psicose	180.068	123.225	180.063	C6H12O6	BioDeepDB	Unknow	3.99634e+07	1.1217e+08	6.17041e+07	6.25795e+07	6.77492e+07	2.61384e+07	3.45415e+07	2.17351e+07	2.72835e+07	1.90493e+07
M149T87	D-Ribose	149.045	87.239	150.053	C5H10O5	BioDeepDB	Organooxygen compounds	1.02409e+08	9.96236e+07	2.02688e+08	7.42466e+07	8.02418e+07	7.77687e+07	4.7568e+07	9.72636e+07	1.12531e+08	8.44739e+07
M133T93	D-Xylitol	133.049	92.8247	152.069	C5H12O5	MoNA	Organooxygen compounds	1.30758e+08	2.39103e+09	2.89239e+09	9.07202e+08	1.08831e+09	2.22643e+08	2.12691e+08	2.11688e+08	9.15829e+07	1.68433e+08
M149T676	D-Xylose	149.045	675.583	150.053	C5H10O5	BioDeepDB	Organooxygen compounds	2.2989e+07	5.17722e+06	1.93492e+06	1.88035e+06	1.91038e+07	3.87499e+06	1.17344e+07	1.4332e+07	1.50905e+06	2.22826e+07
M332T158	dAMP	332.074	158.478	331.068	C10H14N5O6P	BioDeepDB	Purine nucleotides	6.24333e+08	4.01017e+08	7.61356e+07	2.86157e+08	4.43805e+08	1.03173e+08	3.3127e+07	8.02077e+07	9.85607e+07	1.00446e+08
M269T821	Dehydroepiandrosterone	269.213	820.521	288.209	C19H28O2	BioDeepDB	Steroids and steroid derivatives	9.06141e+06	1.94473e+06	2.29266e+06	1.96962e+06	1.55777e+06	2.02527e+06	1.68135e+06	2.2429e+06	1.04833e+07	8.19668e+06
M393T805	Deoxycholic acid	393.284	804.768	392.293	C24H40O4	BioDeepDB	Steroids and steroid derivatives	1.12546e+08	3.25114e+08	2.76608e+08	2.35528e+08	3.18224e+08	2.16541e+08	1.93003e+08	2.31571e+08	1.84994e+08	2.22382e+08
M266T90	Deoxyguanosine	266.088	89.6477	267.097	C10H13N5O4	BioDeepDB	Purine nucleosides	1.05677e+07	4.48892e+07	1.08654e+08	6.54308e+07	5.41297e+07	5.11158e+07	5.07704e+07	7.24065e+07	6.40796e+07	4.53123e+07
M251T321	Deoxyinosine	251.078	320.803	252.086	C10H12N4O4	BioDeepDB	Purine nucleosides	3.77013e+06	159009	6.76256e+06	8.00389e+06	242969	1.3421e+07	8.34226e+06	1.53629e+07	1.60104e+07	6.83289e+06
M135T95	Deoxyribose	135.065	95.2011	134.058	C5H10O4	BioDeepDB	Organooxygen compounds	5.5574e+08	7.50976e+08	4.57178e+08	4.82825e+08	4.99724e+08	5.84578e+07	3.5803e+07	4.93609e+07	1.50016e+07	2.44517e+07
M228T802	Deoxyuridine	228.196	801.577	228.075	C9H12N2O5	BioDeepDB	Pyrimidine nucleosides	6.57949e+07	2.34198e+08	5.54172e+07	4.00258e+07	6.02351e+07	1.16967e+07	1.34636e+07	1.36019e+07	5.35654e+07	2.13063e+08
M167T413_1	Desaminotyrosine	167.07	413.126	166.063	C9H10O3	BioDeepDB	Phenylpropanoic acids	3.1095e+06	2.44598e+06	2.33396e+06	1.54633e+06	2.29351e+06	3.359e+06	4.10948e+06	3.62228e+06	3.76472e+06	3.6223e+06
M213T329	Dethiobiotin	213.124	328.766	214.132	C10H18N2O3	BioDeepDB	Fatty Acyls	4.64319e+07	1.31082e+06	3.59583e+07	5.30483e+06	1.18088e+06	3.93789e+07	3.17346e+07	3.97524e+07	2.45449e+07	1.25089e+08
M346T182_1	dGMP	346.056	181.566	347.063	C10H14N5O7P	BioDeepDB	Purine nucleotides	1.93493e+06	2.94646e+08	5.8563e+06	1.04816e+06	3.21483e+08	8.31808e+08	8.59465e+08	9.96644e+08	3.03445e+06	1.01298e+09
M189T88	Diaminopimelic acid	189.087	88.4531	190.095	C7H14N2O4	MetaDNA	Carboxylic acids and derivatives	3.99942e+06	3.99055e+08	4.27209e+08	5.29685e+07	2.74963e+08	4.6845e+06	5.49744e+06	4.9847e+06	2.64658e+07	4.59892e+06
M308T622	Dihydrocapsaicin	308.222	621.826	307.215	C18H29NO3	BioDeepDB	Benzene and substituted derivatives	60638.6	0	0	0	0	0	0	0	65588.1	47041.4
M115T144	Dihydrouracil	115.05	143.768	114.043	C4H6N2O2	BioDeepDB	Diazines	1.45983e+07	1.44572e+07	2.42632e+07	3.85545e+07	2.03367e+07	2.0063e+07	1.56676e+07	2.2645e+07	1.67458e+07	1.7417e+07
M171T67	Dihydroxyacetone phosphate	171.149	67.2666	169.998	C3H7O6P	BioDeepDB	Organooxygen compounds	1.5625e+07	1.48439e+07	1.71181e+07	1.32633e+07	1.13879e+08	5.28715e+07	1.00494e+07	8.28685e+07	6.87995e+07	1.05197e+07
M154T248	Dilithium carbamoyl phosphate	154.086	247.971	152.999	CH2Li2NO5P	BioDeepDB	Unknow	1.02205e+08	1.0341e+08	5.69446e+07	6.68583e+07	1.03677e+08	6.40613e+07	1.05273e+08	5.04515e+07	5.01124e+07	5.52986e+07
M94T75	Dimethyl sulfone	94.0455	74.8698	94.0089	C2H6O2S	BioDeepDB	Sulfonyls	5.63535e+09	5.33047e+09	5.10072e+09	4.03937e+09	5.15341e+09	7.36809e+09	6.41629e+09	7.74993e+09	7.30905e+09	6.74426e+09
M104T111_2	Dimethylglycine	104.107	110.786	103.063	C4H9NO2	BioDeepDB	Carboxylic acids and derivatives	2.30766e+08	1.79076e+08	4.00667e+08	6.2544e+08	2.39199e+08	2.66809e+08	3.22756e+08	1.90199e+08	3.56558e+08	2.75632e+08
M239T767	DL-Isocitric acid	239.059	766.782	257.973	C6H5Na3O7	BioDeepDB	Unknow	1.05646e+07	1.19956e+07	2.33295e+06	2.90657e+07	1.2388e+07	1.006e+07	1.13614e+07	1.14222e+07	1.53741e+07	9.85072e+06
M184T85	DL-O-Phosphoserine	184.003	84.8092	185.073	C3H8NO6P	BioDeepDB	Carboxylic acids and derivatives	1.1366e+07	9.22855e+07	4.91991e+07	5.01513e+07	6.23313e+07	4.60274e+07	1.07964e+07	6.11801e+07	4.6145e+07	1.21247e+07
M200T62	Dodecanoic acid	199.988	62.2575	200.178	C12H24O2	BioDeepDB	Fatty Acyls	2.65566e+07	3.20611e+07	2.4447e+08	2.03408e+08	2.02155e+08	1.79831e+08	1.79618e+08	1.29963e+08	8.35217e+07	8.76906e+07
M136T419	Dopamine	136.076	418.656	153.079	C8H11NO2	MoNA	Phenols	1.83833e+07	1.70322e+07	1.60333e+07	1.33337e+07	1.44599e+07	6.73092e+07	5.60018e+07	4.31465e+07	4.42468e+07	4.5292e+07
M168T252	Ecgonine	168.102	251.558	185.105	C9H15NO3	MoNA	Tropane alkaloids	1.01046e+07	1.0119e+07	9.38675e+06	1.85259e+07	9.78185e+06	1.76686e+08	1.81785e+08	1.48279e+08	1.51263e+08	1.70032e+08
M258T273	epsilon-(gamma-L-Glutamyl)-L-lysine	258.134	272.592	275.148	C11H21N3O5	MetaDNA	Unknow	3.2014e+07	1.83538e+07	2.0907e+07	2.43304e+07	3.54318e+07	3.39718e+07	2.55817e+07	7.21442e+07	6.65688e+07	4.33008e+07
M242T799	Equol	242.284	798.844	242.094	C15H14O3	BioDeepDB	Isoflavonoids	1.61079e+08	1.68738e+08	1.30038e+08	1.99488e+08	1.56124e+08	1.33654e+08	1.33749e+08	1.34786e+08	1.3436e+08	1.20682e+08
M396T834	Ergocalciferol	396.224	834.447	396.339	C28H44O	BioDeepDB	Steroids and steroid derivatives	7.53386e+06	3.42282e+06	126825	1.20913e+07	6.68589e+06	40161.4	6.47006e+06	1.15224e+07	1.52013e+06	5.952e+06
M230T101	Ergothioneine	230.096	101.307	230.096	C9H16N3O2S	BioDeepDB	Carboxylic acids and derivatives	1.27974e+10	1.13441e+10	2.5976e+09	8.86976e+09	1.02759e+10	1.98544e+09	2.46702e+09	4.15996e+08	3.92655e+08	2.25059e+09
M338T826	Erucic acid	338.342	826.112	338.318	C22H42O2	BioDeepDB	Fatty Acyls	9.77046e+06	3.32417e+07	6.78619e+07	2.99994e+07	8.86978e+07	2.17002e+07	7.37153e+06	3.86458e+07	2.31018e+07	9.67194e+07
M271T427	Estradiol	271.166	426.914	272.178	C18H24O2	MoNA	Steroids and steroid derivatives	1.23695e+06	102045	566124	362456	85337.1	1.65369e+06	73236.9	60378	45668.7	206630
M330T814	Ethyl icosapentate	330.264	814.064	330.256	C22H34O2	BioDeepDB	Fatty Acyls	3.37312e+07	2.56435e+07	1.58881e+07	2.83713e+07	2.6873e+07	1.28231e+07	1.39497e+07	1.31578e+07	1.53487e+07	1.41603e+07
M101T755	Ethylmethylacetic acid	101.023	754.922	102.068	C5H10O2	BioDeepDB	Fatty Acyls	3.78684e+06	2.02925e+07	1.48418e+07	3.27063e+07	9.21634e+06	4.98511e+06	4.61974e+06	6.12506e+07	1.03979e+07	1.45067e+07
M167T835	Ethylparaben	167.07	834.756	166.063	C9H10O3	OTCML	Unknow	6.70517e+07	9.34656e+07	5.88935e+07	4.04957e+07	6.20005e+07	5.09402e+07	6.11539e+07	4.09258e+07	7.29303e+07	3.82858e+07
M279T469	Exemestane	279.169	469.056	296.178	C20H24O2	GNPS	Steroids and steroid derivatives	4.5947e+06	4.98926e+06	5.68179e+06	4.84692e+06	4.69517e+06	4.13836e+06	1.15962e+07	3.83635e+06	3.69796e+06	4.08537e+06
M286T761	Fisetin	286.274	761.293	286.048	C15H10O6	BioDeepDB	Unknow	3.25335e+08	1.68155e+08	2.94568e+08	6.28512e+08	5.97012e+08	1.5465e+08	2.45953e+08	3.29773e+08	2.86803e+08	2.45958e+08
M441T836	Folic acid	441.252	836.09	441.14	C19H19N7O6	BioDeepDB	Carboxylic acids and derivatives	8.52759e+06	1.27892e+07	374959	1.19954e+06	2.63176e+07	1.48958e+07	2.19228e+06	2.11807e+06	2.29434e+06	6.35904e+06
M83T784	Fomepizole	83.0609	783.532	82.0531	C4H6N2	MoNA	Azoles	6.69826e+08	3.23422e+08	2.15257e+08	4.11844e+08	6.63284e+08	3.49819e+08	2.9783e+08	2.66206e+08	1.92191e+08	7.3778e+07
M175T120	Formiminoglutamic acid	175.071	120.183	174.064	C6H10N2O4	MetaDNA	Carboxylic acids and derivatives	3.88093e+07	2.6152e+07	3.40749e+07	3.52259e+07	2.34211e+07	3.81967e+07	4.36155e+07	3.86179e+07	3.77876e+07	3.59815e+07
M164T368	Formylanthranilic acid	164.035	368.113	165.043	C8H7NO3	BioDeepDB	Benzene and substituted derivatives	8.45105e+06	324385	1.63784e+07	2.16509e+07	263747	7.54365e+06	6.44067e+06	8.52078e+06	1.15967e+07	6.15624e+06
M339T76	Fructose 1,6-bisphosphate	338.985	75.8085	339.996	C6H14O12P2	BioDeepDB	Organooxygen compounds	3.85365e+08	4.33654e+08	3.99114e+08	3.55465e+08	3.54138e+08	8.70426e+08	9.31713e+07	1.132e+09	1.00175e+08	5.48728e+08
M161T646	Fructose-1P	161.044	645.767	180.063	C6H12O6	BioDeepDB	Carbohydrates and carbohydrate conjugates	7.13678e+06	9.2579e+06	7.32444e+07	1.68263e+07	3.12934e+06	9.98911e+06	1.36045e+07	1.0788e+07	1.88107e+07	4.63823e+06
M115T80	Fumaric acid	115.002	79.9685	116.011	C4H4O4	BioDeepDB	Carboxylic acids and derivatives	4.98542e+08	3.64862e+08	6.06296e+08	4.0663e+08	3.97513e+08	1.82929e+08	3.34873e+08	2.13714e+08	2.77546e+08	2.10171e+08
M181T140	Galactitol	181.068	140.006	182.079	C6H14O6	BioDeepDB	Organooxygen compounds	5.23956e+09	1.30017e+09	2.82303e+09	4.82741e+09	9.0637e+08	1.93904e+09	6.24981e+09	6.11156e+09	4.8919e+09	3.14436e+09
M129T129	gamma-Amino-gamma-cyanobutanoate	129.065	128.62	128.059	C5H8N2O2	MetaDNA	Carboxylic acids and derivatives	2.75749e+08	6.03315e+08	1.15197e+08	1.64955e+08	5.54337e+08	1.56443e+08	1.32859e+08	1.33457e+08	1.21635e+08	1.37883e+08
M104T87_1	gamma-Aminobutyric acid	104.107	87.4272	103.063	C4H9NO2	BioDeepDB	Carboxylic acids and derivatives	4.91433e+09	4.68289e+09	8.24034e+09	4.51925e+09	4.97512e+09	8.24888e+09	8.41321e+09	1.0199e+10	9.54841e+09	8.23845e+09
M219T143	gamma-Glutamylalanine	219.097	143.442	Unknow	C7H11N2O5R	BioDeepDB	Carboxylic acids and derivatives	9.34218e+06	7.62195e+08	4.15554e+08	1.25449e+07	1.33191e+07	4.98513e+08	6.2004e+08	3.69237e+08	5.97678e+08	5.93127e+08
M267T375	gamma-Glutamyltyramine	267.134	374.568	266.127	C13H18N2O4	MetaDNA	Unknow	5.07613e+07	4.40602e+07	4.59958e+07	3.91454e+07	4.22285e+07	1.54793e+08	1.45197e+08	1.96692e+08	1.65719e+08	1.40469e+08
M410T821	Gamma-Tocotrienol	410.322	821.446	410.318	C28H42O2	BioDeepDB	Prenol lipids	1.01819e+07	1.71462e+06	1.85174e+06	1.10085e+07	2.43228e+06	1.96806e+07	1.78476e+07	2.01315e+07	1.64884e+07	2.35909e+07
M297T773	gamma,gamma-Dimethylallyl pyrophosphate triammonium salt	296.97	772.882	297.18	C5H12O7P2	BioDeepDB	Unknow	9.09276e+07	1.41724e+07	1.41333e+07	1.41369e+07	4.4827e+07	1.1571e+07	9.2279e+07	1.11648e+07	2.38031e+07	8.62522e+06
M249T799	Gemfibrozil	249.149	799.361	250.157	C15H22O3	BioDeepDB	Phenol ethers	865997	4.30692e+06	5.79354e+06	5.6925e+06	859943	2.71987e+06	700819	498982	2.51604e+06	717422
M270T333	Genistein	270.047	332.928	270.053	C15H10O5	BioDeepDB	Isoflavonoids	1.36594e+08	53217	1.00555e+08	7.58843e+07	35100.5	114938	379974	103230	101734	84194.4
M153T240	Gentisic acid	153.018	239.933	154.027	C7H6O4	BioDeepDB	Benzene and substituted derivatives	5.60538e+06	720691	7.06606e+06	7.58959e+06	701511	5.30776e+06	2.99786e+06	5.97044e+06	8.88314e+06	3.96725e+06
M293T781	Gingerol	293.175	780.965	294.183	C17H26O4	MoNA	Phenols	2.83038e+07	3.41956e+07	4.16837e+07	6.23031e+07	4.54646e+07	1.85238e+07	3.74579e+07	3.51099e+07	2.21121e+07	2.4122e+07
M195T85	Gluconic acid	195.05	84.8574	196.058	C6H12O7	BioDeepDB	Organooxygen compounds	1.23791e+08	1.11787e+08	1.59266e+08	1.34894e+08	8.14211e+07	2.24373e+08	1.67509e+08	2.91051e+08	2.7825e+08	2.18655e+08
M162T161	Glucosamine	162.076	160.754	179.079	C6H13NO5	MoNA	Organooxygen compounds	3.08729e+08	2.07278e+08	1.45149e+08	6.87053e+07	2.36968e+08	3.34552e+07	2.41466e+07	3.23405e+07	4.93251e+07	2.47413e+07
M132T33_2	Glutaric acid	131.974	32.9458	132.042	C5H8O4	BioDeepDB	Carboxylic acids and derivatives	2.14664e+07	1.68679e+07	1.5864e+07	1.91909e+07	1.71025e+07	1.58698e+07	1.7009e+07	2.14467e+07	6.7965e+07	1.8996e+07
M307T132	Glutathione	307.082	131.69	307.084	C10H17N3O6S	BioDeepDB	Unknow	1.76722e+09	2.10532e+09	2.1444e+09	5.08655e+06	1.75387e+09	4.05792e+09	2.75602e+09	2.07128e+09	2.8697e+09	3.41209e+09
M89T162	Glyceraldehyde	89.0225	162.267	90.0317	C3H6O3	GNPS	Organooxygen compounds	1.14703e+09	1.66888e+08	1.9826e+08	2.49401e+08	1.38927e+08	4.3248e+08	4.67775e+08	9.74058e+08	3.7344e+08	3.96299e+08
M105T85	Glyceric acid	105.018	85.4095	106.027	C3H6O4	BioDeepDB	Organooxygen compounds	5.46112e+07	3.96824e+07	1.02554e+08	6.47874e+07	3.43499e+07	1.94616e+08	1.3477e+08	2.24498e+08	2.47072e+08	1.50467e+08
M258T157	Glycerophosphocholine	258.108	156.905	258.111	C8H21NO6P	MetaDNA	Glycerophospholipids	1.82841e+08	1.77339e+08	1.10315e+09	2.27271e+08	1.69352e+08	1.68348e+08	2.30351e+08	1.40874e+08	1.04221e+08	1.49503e+08
M189T313	Glycylleucine	189.123	312.798	188.116	C8H16N2O3	MoNA	Carboxylic acids and derivatives	8.6669e+08	5.75957e+08	7.48101e+08	4.01023e+08	5.94087e+08	7.27994e+08	5.02641e+08	6.45066e+08	7.29319e+08	6.94707e+08
M91T338	Glyoxylic acid monohydrate	91.0022	337.764	92.011	C2H4O4	BioDeepDB	Unknow	8.87248e+06	8.70987e+06	2.41033e+07	2.1534e+07	3.83358e+07	8.23786e+06	2.77589e+07	7.61316e+06	1.36605e+07	7.32497e+06
M364T146	GMP	364.064	145.863	363.058	C10H14N5O8P	BioDeepDB	Purine nucleotides	1.32451e+07	9.75641e+06	1.17001e+07	8.17927e+06	1.27666e+07	2.55959e+08	1.9668e+08	2.66698e+08	2.05858e+08	1.83725e+08
M198T268	Guanethidine	198.186	268.269	198.184	C10H22N4	BioDeepDB	Organonitrogen compounds	1.70577e+09	9.33074e+08	1.47299e+09	1.71018e+09	1.29656e+09	2.08738e+08	1.98221e+08	1.94299e+08	1.59768e+09	3.65267e+08
M174T541	Guanidinosuccinic acid	174.055	541.406	175.059	C5H9N3O4	BioDeepDB	Carboxylic acids and derivatives	402626	448908	2.1164e+06	9.19994e+06	374342	565465	7.36588e+06	432321	1.48862e+07	341817
M118T468	Guanidoacetic acid	118.065	468.373	117.054	C3H7N3O2	BioDeepDB	Carboxylic acids and derivatives	7.31918e+08	1.29713e+08	3.21369e+08	4.04628e+08	1.15195e+08	1.05655e+08	5.96507e+08	4.83501e+08	3.2342e+08	2.53095e+08
M152T306	Guanine	152.057	305.933	151.049	C5H5N5O	mzCloud	Imidazopyrimidines	1.16821e+10	1.04172e+10	1.04834e+10	6.87573e+09	1.11829e+10	1.89085e+09	8.80928e+08	1.69463e+09	1.82342e+09	1.44059e+09
M284T306	Guanosine	284.097	305.933	283.092	C10H13N5O5	BioDeepDB	Purine nucleosides	1.42795e+10	1.44261e+10	1.44712e+10	9.11771e+09	1.44375e+10	2.30684e+09	1.03279e+09	2.17407e+09	2.43692e+09	1.85696e+09
M364T186	Guanosine 3-phosphate	364.064	185.52	363.058	C10H14N5O8P	MetaDNA	Azacyclic compounds	5.28229e+07	1.31374e+08	4.94245e+07	1.77936e+08	1.15737e+08	2.03976e+08	1.85682e+08	1.41064e+08	1.14275e+08	2.86089e+07
M335T780	Hepoxilin B3	335.219	779.501	336.23	C20H32O4	BioDeepDB	Fatty Acyls	6.82311e+06	3.97132e+06	1.16187e+07	6.92108e+06	1.21849e+07	2.94745e+06	6.73129e+06	1.51389e+06	5.51975e+06	1.5212e+06
M130T442	Heptanoic acid	130.158	442.08	130.099	C7H14O2	BioDeepDB	Fatty Acyls	4.59502e+08	3.49896e+08	3.71382e+08	8.22269e+08	4.37445e+08	4.66946e+08	1.48347e+09	1.35887e+09	1.14012e+09	1.04976e+09
M285T815	Hexadecanedioate	285.207	814.989	286.214	C16H30O4	mzCloud	Fatty Acyls	8.71799e+06	1.09593e+07	5.90871e+06	7.90827e+06	1.03083e+07	9.71111e+06	9.68835e+06	1.01916e+07	7.73298e+06	1.01301e+07
M178T385	Hippuric acid	178.05	385.105	179.058	C9H9NO3	BioDeepDB	Benzene and substituted derivatives	1.37608e+07	1.15684e+06	1.3076e+07	1.43173e+07	835402	7.70297e+06	3.74817e+06	8.46639e+06	1.0803e+07	5.95047e+06
M110T91	Histamine	110.071	91.4904	111.08	C5H9N3	MoNA	Organonitrogen compounds	3.51833e+07	3.7548e+07	3.58336e+07	3.23404e+07	4.08783e+07	8.14179e+06	4.36174e+07	5.20407e+06	5.4274e+07	4.23643e+07
M188T328	Homo-L-arginine	188.128	327.947	188.127	C7H16N4O2	MoNA	Carboxylic acids and derivatives	4.81682e+07	3.91408e+07	3.51939e+07	3.18802e+07	3.56404e+07	2.86836e+07	2.19242e+07	1.09672e+07	1.84267e+07	2.01054e+07
M167T368	Homogentisate	167.034	367.874	168.042	C8H8O4	mzCloud	Benzene and substituted derivatives	9.61165e+06	172173	1.02025e+07	1.10679e+07	166051	1.99549e+06	2.47063e+06	477350	837578	468146
M97T83_2	Hydrogen phosphate	96.9681	82.5796	97.9769	H3PO4	MoNA	Non-metal oxoanionic compounds	1.42322e+09	1.17466e+09	4.09726e+08	2.09042e+09	1.19154e+09	5.83151e+08	7.17825e+08	6.29312e+08	8.11418e+08	7.04606e+08
M110T306	Hydroquinone	110.035	305.844	110.037	C6H6O2	BioDeepDB	Phenols	7.59525e+07	8.066e+07	7.82111e+07	5.69529e+07	7.96108e+07	5.60732e+06	6.14586e+06	3.90331e+06	6.2857e+06	4.85574e+06
M148T173	Hydroxyisoleucine	148.097	172.631	147.09	C6H13NO3	OTCML	Unknow	1.86832e+07	3.7595e+07	2.54187e+07	1.40251e+07	2.07292e+07	9.99482e+08	1.34419e+08	1.19874e+09	8.33775e+08	2.76353e+08
M225T424	Hydroxykynurenine	225.087	424.079	224.08	C10H12N2O4	BioDeepDB	Organooxygen compounds	1.11725e+08	8.19573e+07	7.82096e+07	4.56449e+07	5.83839e+07	7.86749e+08	8.96769e+08	6.73972e+08	7.34217e+08	6.54615e+08
M89T221	Hydroxypropionic acid	89.0227	220.572	90.0317	C3H6O3	MoNA	Hydroxy acids and derivatives	5.33358e+08	1.60513e+08	6.50271e+08	5.50887e+08	3.97118e+08	7.26319e+08	2.69312e+08	3.43761e+08	5.52277e+08	8.20867e+08
M103T97	Hydroxypyruvic acid	103.002	96.7179	104.011	C3H4O4	MetaDNA	Carboxylic acids and derivatives	2.65815e+07	2.67492e+07	1.0107e+08	1.36425e+08	4.32214e+07	2.34958e+07	3.37933e+07	2.73694e+07	8.87262e+07	2.49988e+07
M153T296	Hydroxytyrosol	153.055	296.45	154.063	C8H10O3	BioDeepDB	Phenols	161700	158617	681659	804341	142402	646874	622433	576486	1.57465e+06	612537
M137T162	Hypoxanthine	137.045	161.611	136.038	C5H4N4O	BioDeepDB	Imidazopyrimidines	1.02988e+09	2.83386e+09	1.82597e+09	2.17715e+09	2.25579e+09	2.48272e+07	1.95587e+08	2.26989e+07	2.09978e+07	1.59937e+08
M127T96	Imidazole-4-acetate	127.05	96.1144	126.043	C5H6N2O2	mzCloud	Azoles	4.98502e+06	4.5653e+06	5.62759e+07	8.14286e+06	5.39884e+06	3.85945e+07	3.87713e+07	2.49671e+07	4.19478e+07	3.10328e+07
M157T96	Imidazolelactic acid	157.061	96.3189	156.053	C6H8N2O3	mzCloud	Azoles	2.87013e+08	2.49385e+08	3.34334e+08	1.04194e+08	1.35773e+08	8.18009e+07	8.16182e+07	4.78646e+07	6.70966e+07	6.78325e+07
M172T152	Iminoarginine	172.097	151.631	172.096	C6H12N4O2	MetaDNA	Unknow	1.39557e+08	1.76337e+08	1.19647e+08	8.58367e+07	8.8675e+07	6.48482e+07	4.60264e+07	7.93251e+07	5.5869e+07	4.64476e+07
M116T378	Indole	116.049	378.203	117.058	C8H7N	MetaDNA	Azacyclic compounds	5.26817e+07	1.65092e+06	4.51601e+07	2.80448e+07	1.45983e+06	9.49373e+06	5.84079e+06	1.21319e+07	1.1985e+07	1.13564e+07
M160T440	Indole-3-carboxylic acid	160.04	439.683	161.048	C9H7NO2	MetaDNA	Indoles and derivatives	4.74457e+06	5.238e+06	3.51897e+06	4.58112e+06	1.26129e+06	2.27324e+06	2.08459e+06	1.77813e+06	3.86002e+06	2.368e+06
M160T403	Indoleacetaldehyde	160.076	402.899	159.068	C10H9NO	MoNA	Indoles and derivatives	1.07715e+08	7.88486e+07	7.6718e+07	4.85157e+07	8.46709e+07	2.30995e+07	1.29963e+07	2.61337e+07	2.39832e+07	2.24963e+07
M188T444	Indolelactic acid	188.07	444.35	205.074	C11H11NO3	BioDeepDB	Indoles and derivatives	1.91554e+07	2.62268e+07	2.49844e+07	1.24687e+07	2.6542e+07	3.81443e+07	3.70532e+07	3.64623e+07	3.51949e+07	3.38921e+07
M269T306	Inosine	269.087	306.325	268.081	C10H12N4O5	BioDeepDB	Purine nucleosides	8.10575e+08	1.57645e+09	1.1828e+09	1.07564e+09	1.03218e+09	6.41402e+07	5.65424e+07	5.02693e+07	5.36804e+07	4.61303e+07
M193T759	Isobutyl 4-hydroxybenzoate	193.086	758.554	194.094	C11H14O3	OTCML	Unknow	1.03209e+07	1.17747e+07	8.16936e+06	1.50274e+07	7.96812e+06	9.20662e+06	1.30869e+07	6.34833e+06	8.12451e+06	4.58647e+06
M297T818	Isopentenyl pyrophosphate triammonium salt solution	297.242	817.82	297.085	C5H21N3O7P2	BioDeepDB	Unknow	2.84469e+06	2.25223e+06	3.99497e+06	1.17823e+07	1.79282e+06	1.41076e+07	2.06788e+07	3.54836e+06	2.42586e+07	1.24988e+07
M130T402	Isoquinoline	130.065	402.3	129.058	C9H7N	mzCloud	Isoquinolines and derivatives	1.6705e+08	1.34673e+08	1.32613e+08	8.05614e+07	1.32272e+08	4.33425e+07	2.38289e+07	3.85605e+07	3.76837e+07	3.68142e+07
M102T199	Isovaleric acid	102.103	198.731	102.068	C5H10O2	BioDeepDB	Fatty Acyls	2.69241e+06	1.333e+07	3.79572e+06	1.0239e+07	1.30922e+07	1.80226e+07	1.61109e+07	6.39137e+06	1.44478e+07	8.49238e+06
M129T81	Itaconate	129.018	81.1743	130.027	C5H6O4	mzCloud	Fatty Acyls	2.94711e+08	2.69286e+08	2.98739e+08	3.17379e+08	2.72927e+08	2.88126e+08	3.02282e+08	3.26629e+08	4.39256e+08	3.02858e+08
M299T717	Kaempferide	299.059	716.733	300.063	C16H12O6	BioDeepDB	Flavonoids	8.42487e+06	1.19988e+07	2.15217e+06	4.82621e+06	6.90521e+06	6.87042e+06	9.17579e+06	8.81834e+06	1.26344e+07	9.55519e+06
M113T309	Ketoleucine	113.06	309.458	130.063	C6H10O3	BioDeepDB	Keto acids and derivatives	1.14181e+08	1.20406e+08	1.18841e+08	9.06045e+07	1.27536e+08	7.22728e+07	8.35332e+06	5.92974e+07	6.70222e+07	7.13106e+07
M188T529	Kynurenic acid	188.035	528.924	189.043	C10H7NO3	MoNA	Quinolines and derivatives	41402.4	62995.4	698317	8.69618e+06	52944.4	85162.6	132224	70083.8	2.65555e+06	16045.2
M338T191	Kyotorphin	338.181	190.928	337.175	C15H23N5O4	MetaDNA	Benzene and substituted derivatives	9.63024e+07	7.4241e+07	8.84922e+07	5.44646e+07	6.81662e+07	9.50087e+07	8.10983e+07	1.12614e+08	8.84464e+07	8.73089e+07
M149T58	L-2-Hydroxyglutaric acid	148.977	58.1247	148.037	C5H8O5	BioDeepDB	Fatty Acyls	2.37311e+08	1.19836e+08	1.65282e+08	2.3626e+08	2.4546e+08	2.19098e+08	2.005e+08	8.39094e+07	1.22028e+08	5.86736e+07
M207T424	L-3-Hydroxykynurenine	207.076	424.127	224.08	C10H12N2O4	MetaDNA	Benzene and substituted derivatives	1.48164e+07	1.105e+07	9.84449e+06	6.5796e+06	8.38003e+06	1.07433e+08	1.17564e+08	9.4056e+07	9.95124e+07	9.40221e+07
M167T76	L-4-Hydroxyphenylglycine	167.012	75.7697	167.058	C8H9NO3	BioDeepDB	Unknow	1.78465e+07	2.00247e+07	2.05569e+07	6.00881e+07	3.61014e+07	1.59508e+07	6.32975e+06	1.35769e+07	5.94447e+06	4.5303e+06
M89T455	L-Alanine	89.0226	455.127	89.0477	C3H7NO2	BioDeepDB	Carboxylic acids and derivatives	4.09918e+08	2.26177e+08	1.97478e+08	1.33525e+09	1.49604e+08	2.355e+08	6.81829e+07	2.0892e+08	9.43291e+07	5.79877e+07
M217T92	L-Alanyl-D-glutamate	217.082	91.6735	218.09	C8H14N2O5	MetaDNA	Unknow	1.51653e+07	6.1529e+07	5.94463e+07	4.04098e+07	4.44057e+07	5.71126e+07	6.11844e+07	6.47068e+07	1.70605e+07	5.79958e+07
M327T89	L-Alanyl-gamma-D-glutamyl-L-lysine	327.176	88.5697	346.185	C14H26N4O6	MetaDNA	Unknow	5.7289e+07	5.47196e+07	4.36195e+07	3.83657e+07	5.20322e+07	1.66026e+08	2.28736e+08	1.55647e+08	2.6533e+08	2.18149e+08
M104T278	L-alpha-Aminobutyric acid	104.071	277.865	103.063	C4H9NO2	MoNA	Carboxylic acids and derivatives	9.49803e+08	5.74558e+08	7.96159e+08	1.80378e+08	1.83605e+08	2.57709e+08	2.4473e+08	5.19845e+08	3.97773e+08	3.9339e+08
M173T89	L-Arginine	173.103	88.596	174.112	C6H14N4O2	BioDeepDB	Carboxylic acids and derivatives	8.90842e+08	9.48905e+08	9.77662e+08	1.25432e+09	1.00156e+09	4.12575e+08	2.94975e+08	5.06145e+08	5.23247e+07	3.39874e+08
M208T303	L-Arogenate	208.061	302.697	227.079	C10H13NO5	MetaDNA	Carboxylic acids and derivatives	2.45555e+07	1.61808e+07	6.04956e+07	1.89405e+07	2.50591e+07	7.14849e+06	5.67369e+06	1.03276e+07	1.34996e+07	6.44487e+06
M131T87_2	L-Asparagine	131.045	87.3954	132.054	C4H8N2O3	BioDeepDB	Carboxylic acids and derivatives	4.74333e+08	4.08548e+08	7.26864e+08	5.2792e+08	3.64805e+08	4.15913e+08	2.06594e+08	6.14598e+08	6.39877e+08	2.79881e+08
M132T84	L-Aspartic acid	132.029	83.6389	133.037	C4H7NO4	BioDeepDB	Carboxylic acids and derivatives	2.73112e+08	2.25527e+08	4.20539e+08	4.22643e+08	2.1562e+08	2.93076e+08	3.40367e+08	3.55272e+08	3.52411e+08	3.00187e+08
M162T90	L-Carnitine	162.111	89.8205	161.105	C7H15NO3	BioDeepDB	Organonitrogen compounds	1.51909e+10	1.06965e+10	9.89201e+09	1.17446e+10	1.19708e+10	6.94575e+08	9.51769e+08	5.19013e+08	5.66976e+08	8.10385e+08
M180T769	L-Carnitine hydrochloride	180.074	769.13	197.082	C7H16ClNO3	BioDeepDB	Unknow	3.39353e+07	6.19627e+07	7.1442e+07	3.3559e+07	3.4185e+08	1.30988e+08	2.98162e+07	1.28645e+08	4.49855e+07	1.42592e+08
M221T85	L-Cystathionine	221.06	85.031	222.067	C7H14N2O4S	GNPS	Carboxylic acids and derivatives	2.41763e+08	3.20832e+08	3.96316e+08	2.67586e+08	2.56398e+08	1.72292e+07	4.30228e+07	2.67953e+07	2.34456e+07	3.82215e+07
M187T64	L-Cysteic acid monohydrate	187.126	64.4419	187.015	C3H9NO6S	BioDeepDB	Unknow	1.01596e+07	2.67172e+07	1.81459e+07	2.44827e+07	3.14418e+06	1.16078e+07	8.84529e+06	6.88289e+06	3.16192e+06	1.00061e+07
M121T76	L-Cysteine	120.981	75.7083	121.02	C3H7NO2S	BioDeepDB	Carboxylic acids and derivatives	0	1.43581e+06	2.14451e+06	1.9679e+07	2.4965e+06	1.48747e+06	1.2326e+06	1.0295e+06	2.17329e+06	2.55638e+06
M171T191	L-Cysteinesulfinic acid monohydrate	171.149	190.762	171.02	C3H9NO5S	BioDeepDB	Unknow	1.75194e+07	1.81562e+07	1.8918e+07	6.79009e+07	6.49217e+07	6.61832e+07	6.2581e+07	6.0383e+07	1.51064e+07	6.19425e+07
M198T308	L-Dopa	198.076	307.906	197.069	C9H11NO4	BioDeepDB	Carboxylic acids and derivatives	9.48104e+07	1.17592e+08	2.28816e+08	9.48964e+07	9.19481e+07	5.54654e+06	4.70146e+06	2.10427e+07	1.51053e+07	1.38983e+07
M101T280	L-Erythrulose	101.023	279.653	120.042	C4H8O4	BioDeepDB	Organooxygen compounds	3.45352e+07	7.40616e+06	7.52605e+07	7.66867e+07	5.81374e+06	1.93575e+08	5.25032e+07	3.55868e+07	6.61098e+07	7.02315e+07
M163T109	L-Fucose	163.059	109.39	164.069	C6H12O5	BioDeepDB	Organooxygen compounds	1.79072e+08	9.44565e+07	3.39615e+08	2.16013e+08	7.96148e+07	5.12582e+08	6.68417e+08	1.47506e+08	1.5236e+08	5.38967e+08
M148T90	L-Glutamic acid	148.06	89.8246	147.053	C5H9NO4	BioDeepDB	Carboxylic acids and derivatives	8.39289e+08	2.21413e+09	1.42803e+09	3.01848e+09	1.79705e+09	6.29705e+09	6.5902e+09	6.70362e+09	6.21844e+09	6.38169e+09
M147T91	L-Glutamine	147.075	90.8885	146.069	C5H10N2O3	BioDeepDB	Carboxylic acids and derivatives	6.69981e+08	1.16118e+09	5.78026e+08	5.69395e+08	8.16911e+08	1.3113e+09	1.08031e+09	1.38921e+09	1.08934e+09	1.10721e+09
M180T179	L-Gulose	180.066	178.717	180.063	C6H12O6	BioDeepDB	Organooxygen compounds	1.83942e+09	2.18668e+07	1.77164e+09	1.40104e+09	2.77167e+06	6.03638e+08	4.33886e+08	8.03796e+08	7.98203e+08	6.55976e+08
M154T91	L-Histidine	154.061	90.9922	155.07	C6H9N3O2	BioDeepDB	Carboxylic acids and derivatives	2.7996e+09	3.28168e+09	4.1283e+09	2.96279e+09	2.94254e+09	2.94853e+09	3.33572e+09	1.78434e+09	4.93837e+09	3.46947e+09
M118T785	L-Homoserine	118.049	785.248	119.058	C4H9NO3	BioDeepDB	Carboxylic acids and derivatives	1.09205e+08	4.58603e+07	6.12396e+06	1.15352e+08	2.74742e+07	3.21456e+07	1.63954e+07	5.48389e+07	1.50234e+07	3.3149e+07
M181T610_2	L-Iditol	181.073	609.894	182.079	C6H14O6	BioDeepDB	Organooxygen compounds	3.84331e+08	1.05674e+09	1.60723e+09	2.21853e+09	2.52064e+08	2.63748e+08	1.89119e+09	3.65876e+08	1.0063e+09	1.36533e+09
M132T223	L-Isoleucine	132.065	222.926	131.095	C6H13NO2	BioDeepDB	Carboxylic acids and derivatives	1.71991e+08	1.25228e+08	1.49602e+08	1.07767e+08	1.10057e+08	6.335e+08	6.02421e+08	5.47279e+08	4.73798e+08	4.81376e+08
M209T340	L-Kynurenine	209.092	340.1	208.085	C10H12N2O3	BioDeepDB	Organooxygen compounds	1.88215e+07	1.96371e+07	8.65363e+06	7.41575e+06	1.47905e+07	6.61479e+06	5.29058e+06	4.44019e+06	3.24395e+06	1.32986e+06
M91T76_2	L-Lactic acid	91.0281	75.7808	90.0317	C3H6O3	BioDeepDB	Hydroxy acids and derivatives	760049	2.5106e+06	1.43378e+06	4.16001e+07	922358	1.72902e+06	1.86456e+06	1.93273e+06	245750	1.65772e+06
M132T234_1	L-Leucine	132.102	233.762	131.095	C6H13NO2	BioDeepDB	Carboxylic acids and derivatives	3.46732e+10	3.33557e+10	3.03862e+10	2.02371e+10	2.8342e+10	2.29015e+10	1.49624e+10	2.18925e+10	2.0784e+10	2.17343e+10
M145T86	L-Lysine	145.097	85.8603	146.106	C6H14N2O2	BioDeepDB	Carboxylic acids and derivatives	6.18827e+08	5.81863e+08	1.16451e+08	5.05749e+08	6.15415e+08	1.76544e+09	1.65605e+09	1.39567e+09	2.37511e+09	2.09073e+09
M129T190	L-Lysine 1,6-lactam	129.102	190.406	128.095	C6H12N2O	MetaDNA	Azacyclic compounds	4.7656e+07	4.12067e+07	4.53054e+07	2.85752e+07	4.56427e+07	5.38122e+07	5.79101e+07	5.04244e+07	6.2266e+07	5.70364e+07
M166T611	L-lysine hydrochloride	166.085	610.816	182.649	C6H15ClN2O2	BioDeepDB	Carboxylic acids and derivatives	1.3333e+07	3.83583e+07	4.73551e+07	3.1855e+07	9.16027e+06	9.39525e+06	2.56369e+07	5.16026e+07	7.42351e+06	8.05221e+06
M133T154	L-Malic acid	133.013	153.965	134.022	C4H6O5	BioDeepDB	Fatty Acyls	4.37359e+07	8.82074e+06	3.9918e+07	1.09741e+07	5.69603e+06	1.75527e+07	3.07425e+07	2.7683e+07	2.76445e+07	2.72695e+07
M150T148	L-Methionine	150.058	147.533	149.051	C5H11NO2S	BioDeepDB	Carboxylic acids and derivatives	7.12119e+09	6.07309e+09	6.0317e+09	4.60667e+09	5.83498e+09	2.89004e+09	1.24887e+09	3.30805e+09	2.85457e+09	2.51849e+09
M166T91	L-Methionine S-oxide	166.053	91.3628	165.046	C5H11NO3S	mzCloud	Endogenous Metabolites	1.8735e+07	1.08427e+07	2.02183e+07	1.31169e+07	1.22682e+07	2.98645e+08	2.28556e+08	2.93553e+08	3.03041e+08	2.44431e+08
M132T432	L-Norleucine	132.102	432.441	131.095	C6H13NO2	MoNA	Carboxylic acids and derivatives	2.14683e+08	4.93778e+07	9.1875e+07	1.1224e+08	1.37037e+08	1.43374e+08	1.84335e+08	4.63921e+07	4.17918e+07	9.78556e+07
M116T224	L-Norvaline	116.07	223.867	117.079	C5H11NO2	BioDeepDB	Unknow	6.01915e+07	5.58178e+07	5.7928e+07	6.44117e+07	2.29126e+07	6.06095e+07	3.1388e+07	1.33292e+08	2.24693e+07	1.96028e+08
M164T330	L-Phenylalanine	164.07	329.517	165.079	C9H11NO2	BioDeepDB	Unknow	2.23178e+09	1.00155e+07	1.99292e+09	1.66044e+09	8.70612e+06	1.09954e+09	7.5337e+08	1.35962e+09	1.38439e+09	1.17286e+09
M116T100	L-Proline	116.107	99.9192	115.063	C5H9NO2	BioDeepDB	Carboxylic acids and derivatives	4.68271e+07	2.76902e+07	1.97456e+07	2.90113e+07	1.70912e+07	1.02494e+07	6.83901e+08	1.02072e+07	1.46232e+07	1.56929e+09
M255T325	L-Pyrrolysine	255.166	325.118	255.158	C12H21N3O3	MetaDNA	Azacyclic compounds	2.29616e+07	2.50079e+07	6.07138e+06	5.27416e+07	2.44238e+07	9.57064e+07	9.41502e+07	8.14233e+07	7.55396e+07	8.44653e+07
M131T624	L-Ribulose	131.033	623.596	150.053	C5H10O5	BioDeepDB	Organooxygen compounds	7.88687e+06	5.51862e+06	2.47424e+07	2.66197e+07	2.70384e+06	7.49299e+06	2.6019e+07	1.52007e+07	3.9307e+07	7.15062e+06
M104T87	L-Serine	104.034	87.0496	105.043	C3H7NO3	BioDeepDB	Carboxylic acids and derivatives	5.64739e+08	4.65339e+08	6.91606e+08	5.13434e+08	3.7675e+08	3.84792e+08	3.84627e+08	4.37018e+08	5.51446e+08	3.89655e+08
M175T161	L-Theanine	175.108	160.785	174.1	C7H14N2O3	MoNA	Carboxylic acids and derivatives	6.71397e+08	4.91601e+08	6.13633e+08	4.14222e+08	5.05212e+08	8.12037e+08	6.00293e+08	7.24177e+08	7.49874e+08	7.11756e+08
M129T172	L-threo-3-Methylmalate	129.018	172.407	148.037	C5H8O5	MetaDNA	Carboxylic acids and derivatives	2.80177e+07	6.04833e+06	1.90201e+07	2.01443e+07	4.28129e+06	1.13195e+07	1.97376e+07	2.49964e+07	2.61868e+07	2.1562e+07
M120T89	L-Threonine	120.066	88.6338	119.058	C4H9NO3	BioDeepDB	Carboxylic acids and derivatives	4.20879e+08	4.81276e+08	3.95931e+08	7.18466e+08	4.13639e+08	5.63064e+08	5.48654e+08	9.00356e+08	5.60464e+08	5.85588e+08
M205T402	L-Tryptophan	205.097	402.129	204.09	C11H12N2O2	BioDeepDB	Indoles and derivatives	1.46816e+10	1.0906e+10	1.02371e+10	5.15065e+09	1.01021e+10	2.89643e+09	1.60128e+09	3.05182e+09	2.7387e+09	2.65494e+09
M182T209	L-Tyrosine	182.081	208.969	181.074	C9H11NO3	BioDeepDB	Carboxylic acids and derivatives	2.03408e+10	1.77711e+10	1.68146e+10	1.02424e+10	1.66636e+10	8.4456e+09	5.1139e+09	7.76964e+09	7.74158e+09	7.64831e+09
M118T106	L-Valine	118.086	106.168	117.079	C5H11NO2	BioDeepDB	Carboxylic acids and derivatives	8.50949e+09	1.27613e+10	3.8337e+10	5.34782e+09	8.8887e+09	3.19588e+10	2.11402e+10	4.03135e+10	2.5985e+10	2.21905e+10
M147T102_1	L-Xylonate	147.029	101.881	166.048	C5H10O6	MetaDNA	Carboxylic acids and derivatives	2.48124e+07	1.93983e+07	3.17606e+07	3.07668e+07	2.21264e+07	1.66571e+07	1.8898e+07	2.36823e+07	2.90798e+07	1.92232e+07
M162T215	L(-)-Carnitine	162.112	215.188	161.105	C7H15NO3	mzCloud	Endogenous Metabolites	1.19848e+08	1.95007e+07	1.70349e+07	1.77856e+07	2.20551e+07	7.1575e+06	3.42541e+07	5.70333e+06	1.47061e+07	1.52753e+07
M328T827	Labetalol	328.184	826.727	328.179	C19H24N2O3	BioDeepDB	Benzene and substituted derivatives	1.95483e+07	2.41224e+07	2.48227e+07	2.80023e+07	2.71997e+07	2.24349e+07	2.2198e+07	1.96933e+07	2.18837e+07	2.2593e+07
M229T394	Leucylproline	229.154	394.381	228.147	C11H20N2O3	mzCloud	Carboxylic acids and derivatives	7.51825e+08	3.44608e+08	6.68708e+08	3.81005e+08	3.61089e+08	1.62191e+09	7.14614e+08	1.24933e+09	9.22229e+08	1.06102e+09
M171T396	Levetiracetam	171.113	396.107	170.106	C8H14N2O2	MoNA	Carboxylic acids and derivatives	1.02302e+07	8.59966e+06	8.96868e+06	8.76213e+07	8.58024e+06	6.23594e+07	4.39935e+07	6.35801e+07	5.14295e+07	4.97839e+07
M161T633	Lichenin	161.044	632.525	162.053	C6H10O5	MetaDNA	Unknow	7.54832e+06	3.6581e+06	1.4865e+08	2.48715e+08	4.25853e+06	7.34333e+06	3.85665e+07	1.57662e+07	2.23179e+08	5.49291e+07
M281T832	Linoleic acid	281.247	831.584	280.24	C18H32O2	BioDeepDB	Fatty Acyls	698860	1.02221e+06	1.52581e+06	5.56508e+06	938733	1.30551e+06	1.49465e+06	4.23636e+06	4.498e+06	1.03118e+06
M409T834	LysoPA(16:0/0:0)	409.236	834.404	410.243	C19H39O7P	BioDeepDB	Glycerophospholipids	3.3568e+07	5.77579e+07	2.37067e+06	1.57998e+08	8.05758e+07	7.64602e+07	1.65345e+08	1.2591e+08	1.13246e+08	1.30319e+08
M109T752	m-Cresol	109.101	752.285	108.058	C7H8O	BioDeepDB	Phenols	1.92636e+07	2.02376e+07	1.62111e+07	1.6838e+07	1.43673e+07	1.78709e+07	1.86402e+07	3.06322e+07	2.02308e+07	2.34038e+07
M99T62_1	Maleic acid	98.5122	61.535	116.011	C4H4O4	BioDeepDB	Unknow	5.81841e+08	6.25848e+08	6.04039e+08	1.5337e+08	6.19946e+08	1.48365e+08	5.39079e+08	4.43524e+08	4.85838e+08	4.41475e+08
M98T76_1	Maleimide	97.9917	75.6353	97.0164	C4H3NO2	BioDeepDB	Unknow	3.56497e+06	5.70795e+06	6.25912e+06	2.40995e+07	4.3749e+06	4.11294e+06	3.19639e+06	8.08929e+06	1.51459e+06	647343
M125T426	Maltol	125.023	425.612	126.032	C6H6O3	MoNA	Pyrans	1.20649e+06	1.11713e+06	3.89961e+07	3.12835e+07	1.06186e+06	1.32342e+07	2.56372e+06	1.39817e+07	3.90468e+07	9.8035e+06
M503T99	Maltotriose	503.162	99.0041	504.169	C18H32O16	MoNA	Organooxygen compounds	8.07897e+06	381741	1.15277e+06	1.21073e+07	82323.3	1.42342e+07	2.44155e+07	1.35485e+07	1.12481e+07	1.08805e+07
M181T92_1	Mannitol	181.004	91.8182	182.079	C6H14O6	BioDeepDB	Organooxygen compounds	1.54938e+08	1.39381e+08	1.78109e+08	1.69592e+08	1.7525e+08	1.68004e+08	1.54427e+08	1.70995e+08	1.94151e+08	1.31532e+08
M261T81_2	Mannitol 1-phosphate	261.038	81.1784	262.045	C6H15O9P	MetaDNA	Organic oxides	1.66549e+08	1.59258e+08	3.03687e+08	1.45905e+08	1.70289e+08	4.25181e+08	5.23997e+08	3.56086e+08	5.11993e+08	5.64682e+08
M242T358	Mefenamic acid	242.114	358.413	241.11	C15H15NO2	GNPS	Benzene and substituted derivatives	8.29835e+07	3.47224e+07	4.94346e+07	7.20633e+07	4.14704e+07	2.85781e+08	6.20102e+07	1.57482e+08	4.41099e+08	1.06613e+08
M318T737	Melanin	318.299	736.737	318.284	C18H10N2O4	BioDeepDB	Organooxygen compounds	3.62464e+08	2.2247e+08	4.22957e+08	1.9001e+08	2.37687e+08	1.05944e+08	1.26528e+08	9.87359e+07	8.52528e+07	4.95146e+07
M343T96	Melibiitol	343.125	95.547	344.132	C12H24O11	MetaDNA	Fatty Acyls	5.98652e+06	1.67981e+07	3.17529e+07	2.48513e+07	1.11976e+08	4.8826e+07	3.21071e+07	5.51171e+07	4.72089e+07	1.34482e+07
M180T358	Metanephrine	180.101	358.274	197.105	C10H15NO3	BioDeepDB	Phenols	5.11925e+09	5.12065e+09	5.13246e+09	3.57477e+09	4.88646e+09	3.80738e+09	3.99113e+09	3.84723e+09	3.00608e+09	3.0146e+09
M160T102	Methacholine	160.133	102.438	160.134	C8H18NO2	mzCloud	Organonitrogen compounds	4.79505e+08	4.68674e+08	5.9185e+08	4.27476e+08	4.73881e+08	3.12775e+08	2.91954e+08	3.10445e+08	2.96855e+08	3.06389e+08
M151T613	Methyl 2-hydroxybenzoate	151.039	612.729	152.047	C8H8O3	MoNA	Benzene and substituted derivatives	891948	658386	4.26535e+06	2.5677e+07	642590	1.12595e+06	1.91507e+06	1.21971e+06	1.85453e+07	1.31927e+06
M193T152	Methyl beta-D-galactoside	193.071	151.759	194.079	C7H14O6	BioDeepDB	Unknow	2.7038e+07	742850	1.8671e+07	2.27312e+07	760825	1.37788e+07	1.73071e+07	1.52412e+07	1.6999e+07	1.6779e+07
M339T103	Methyl-2-alpha-L-fucopyranosyl-beta-D-galactoside	339.129	102.611	340.137	C13H24O10	MetaDNA	Organooxygen compounds	999851	64280.4	2.6858e+06	2.26283e+06	0	1.20032e+07	1.35281e+07	1.23625e+07	1.73904e+07	1.94279e+07
M117T809	Methylmalonic acid	117.017	809.321	118.027	C4H6O4	BioDeepDB	Carboxylic acids and derivatives	2.45277e+07	6.65811e+06	1.63145e+07	5.75301e+07	5.78669e+06	3.16856e+07	3.46387e+07	9.49775e+06	1.37659e+07	1.81925e+08
M300T616	Metoclopramide	300.143	615.856	299.14	C14H22ClN3O2	BioDeepDB	Phenol ethers	260343	0	0	0	0	3.1025e+07	0	2.90097e+07	0	0
M237T403	Midodrine	237.123	403.368	254.127	C12H18N2O4	BioDeepDB	Benzene and substituted derivatives	1.11965e+08	9.58834e+07	1.02437e+08	6.45607e+07	8.32309e+07	1.0106e+08	9.88165e+07	9.73418e+07	9.35225e+07	1.12449e+08
M190T166	Miglitol	190.107	165.917	207.111	C8H17NO5	MoNA	Piperidines	2.24322e+08	2.22594e+08	5.30923e+07	2.91996e+07	2.19115e+08	1.15921e+08	3.19257e+07	1.30469e+08	9.65938e+07	9.22671e+07
M211T190	Milrinone	211.072	190.02	211.075	C12H9N3O	OTCML	Unknow	1.16257e+08	1.42371e+06	1.11918e+08	1.33193e+08	1.09661e+06	1.39542e+08	1.46953e+08	1.48256e+08	1.37267e+08	1.18366e+08
M113T118	Monoethyl malonic acid	113.023	118.386	132.042	C5H8O4	BioDeepDB	Carboxylic acids and derivatives	1.73272e+07	4.71033e+06	2.18128e+07	4.2166e+07	1.79813e+07	3.81579e+07	1.8386e+07	8.08918e+06	5.70043e+07	6.54471e+06
M234T119	Muramic acid	234.097	118.62	251.101	C9H17NO7	MoNA	Organooxygen compounds	5.5525e+06	6.53167e+06	7.43514e+06	5.70379e+06	4.89171e+06	7.14006e+06	4.31732e+06	8.31262e+06	5.28507e+06	4.38864e+06
M161T90	myo-Inositol	161.044	89.862	180.063	C6H12O6	BioDeepDB	Organooxygen compounds	1.08636e+08	2.34003e+08	3.34116e+08	6.11391e+08	1.15638e+08	1.22798e+08	3.69389e+07	4.65157e+07	3.83809e+07	6.9861e+07
M229T754_1	Myristic acid	229.18	754.017	228.209	C14H28O2	BioDeepDB	Fatty Acyls	1.46025e+07	1.04943e+07	1.42516e+07	2.67803e+07	1.11083e+07	1.19936e+07	1.4167e+07	1.10043e+07	1.22486e+07	1.01028e+07
M147T623	N-(4-Aminobutyl)acetamide hydrochloride	147.065	623.28	166.087	C6H15ClN2O	BioDeepDB	Unknow	4.1734e+06	5.65433e+06	3.50543e+07	1.15853e+08	1.49905e+06	1.15023e+07	8.05484e+06	8.39841e+06	1.75531e+08	1.21631e+07
M129T111	N-acetyl-beta-alanine	128.958	110.987	130.123	Unknow	BioDeepDB	Unknow	3.13934e+07	1.10582e+07	3.06374e+07	8.79436e+07	8.75478e+06	2.73141e+07	7.37673e+07	4.4543e+07	8.01198e+07	4.20684e+07
M204T98	N-Acetyl-D-galactosamine	204.086	98.394	221.09	C8H15NO6	BioDeepDB	Unknow	1.94797e+08	1.93354e+08	1.84828e+08	2.12206e+08	1.98059e+08	2.37164e+08	1.83833e+08	2.32907e+08	1.8484e+08	1.91758e+08
M220T99	N-Acetyl-D-glucosamine	220.082	99.2772	221.09	C8H15NO6	BioDeepDB	Organooxygen compounds	2.23165e+07	1.56083e+07	3.68317e+07	3.27657e+07	2.15051e+07	2.24009e+07	2.26959e+07	2.92097e+07	3.88799e+07	1.63776e+07
M300T81	N-Acetyl-D-Glucosamine 6-Phosphate	300.049	81.281	301.056	C8H16NO9P	MetaDNA	Carboxylic acids and derivatives	2.83899e+07	2.12196e+07	3.77859e+07	8.30015e+06	3.78138e+07	3.71842e+06	1.11524e+06	6.07168e+06	6.45683e+06	6.86353e+06
M192T428	N-Acetyl-DL-methionine	192.07	428.392	191.062	C7H13NO3S	BioDeepDB	Unknow	1.58446e+06	2.27961e+06	1.7985e+06	1.10295e+06	1.48329e+06	2.2734e+08	2.00454e+08	1.87844e+08	1.4318e+08	1.35701e+08
M245T420	N-Acetyl-DL-tryptophan	245.093	420.43	246.1	C13H14N2O3	BioDeepDB	Unknow	366575	792120	1.20704e+07	8.03938e+06	224428	2.53117e+07	1.98071e+07	2.43537e+07	2.19689e+07	1.49702e+07
M174T82	N-Acetyl-L-aspartic acid	174.04	82.3674	175.048	C6H9NO5	BioDeepDB	Carboxylic acids and derivatives	4.74359e+06	5.96833e+06	1.11685e+07	9.37699e+06	3.72829e+06	4.81398e+06	7.6753e+06	3.53719e+06	3.01652e+06	4.27448e+06
M174T137	N-Acetyl-L-glutamate 5-semialdehyde	174.076	137.278	173.069	C7H11NO4	MetaDNA	Carboxylic acids and derivatives	9.638e+06	9.89551e+06	1.17343e+07	7.88473e+06	8.42928e+06	6.00702e+07	6.25031e+07	5.52772e+07	4.83485e+07	4.39526e+07
M187T97	N-Acetyl-L-glutamine	187.072	96.5476	188.08	C7H12N2O4	mzCloud	Endogenous Metabolites	2.38579e+07	2.83194e+07	3.82526e+07	2.53953e+07	3.51546e+07	1.18204e+08	1.14626e+08	1.10433e+08	1.2801e+08	1.22933e+08
M206T398	N-Acetyl-L-phenylalanine	206.082	398.453	207.089	C11H13NO3	BioDeepDB	Carboxylic acids and derivatives	6.94727e+07	207074	6.42166e+07	3.89393e+07	153660	5.85837e+08	4.08254e+08	5.19225e+08	6.10077e+08	3.06316e+08
M173T91	N-Acetylasparagine	173.056	91.1612	174.064	C6H10N2O4	BioDeepDB	Carboxylic acids and derivatives	4.34975e+07	2.64774e+07	5.77108e+07	4.12288e+07	6.92875e+06	4.96169e+07	7.20907e+07	6.94481e+07	8.53624e+07	5.94405e+07
M188T84	N-Acetylglutamic acid	188.056	83.7084	189.064	C7H11NO5	BioDeepDB	Carboxylic acids and derivatives	1.13179e+08	7.44356e+07	1.09572e+08	1.29259e+08	8.72343e+07	1.06096e+08	1.20972e+08	1.1005e+08	1.50516e+08	1.27325e+08
M154T142	N-Acetylhistamine	154.097	142.302	153.09	C7H11N3O	MoNA	Carboxylic acids and derivatives	4.79556e+07	2.84518e+07	2.92542e+07	2.46452e+07	2.48315e+07	2.53407e+07	3.34294e+07	2.4407e+07	6.99417e+06	5.2786e+07
M196T102	N-Acetylhistidine	196.072	101.881	197.08	C8H11N3O3	MoNA	Carboxylic acids and derivatives	2.87188e+07	4.1672e+07	4.80894e+07	3.36623e+07	2.88424e+07	3.03825e+07	5.27376e+07	2.8478e+07	4.69501e+07	4.50996e+07
M172T367	N-Acetylleucine	172.097	366.758	173.105	C8H15NO3	BioDeepDB	Carboxylic acids and derivatives	2.27551e+08	1.0004e+06	2.48366e+08	2.27504e+08	725991	8.5746e+08	1.16553e+09	1.13111e+09	1.0884e+09	9.43392e+08
M204T164	N-Acetylmannosamine	204.087	163.977	221.09	C8H15NO6	MoNA	Organooxygen compounds	7.15397e+07	8.26648e+07	6.32513e+07	6.77324e+07	4.85681e+07	2.28456e+07	5.76007e+07	1.57237e+07	9.61233e+07	1.68275e+07
M175T99	N-Acetylornithine	175.108	98.82	174.1	C7H14N2O3	BioDeepDB	Carboxylic acids and derivatives	1.04995e+08	3.03346e+08	1.72712e+08	2.09682e+08	2.91999e+08	2.90713e+08	1.93912e+08	4.13042e+08	5.11802e+08	2.73242e+08
M131T101	N-Acetylputrescine	131.117	101.306	130.111	C6H14N2O	BioDeepDB	Carboximidic acids and derivatives	4.69298e+10	4.00452e+10	4.31262e+10	2.66171e+10	3.83906e+10	8.97416e+09	1.17005e+10	9.55732e+09	1.01191e+10	1.19215e+10
M219T478	N-Acetylserotonin	219.113	477.992	218.106	C12H14N2O2	MoNA	Indoles and derivatives	5.43393e+07	4.99201e+07	3.76509e+07	3.48991e+07	5.00388e+07	8.18069e+07	6.0497e+07	7.72743e+07	6.06907e+07	5.92957e+07
M180T430	N-Acetyltyramine	180.103	429.845	179.095	C10H13NO2	mzCloud	Unknow	1.03182e+08	9.93699e+07	6.10749e+07	5.39723e+07	8.95682e+07	1.03544e+08	7.8166e+07	7.87167e+07	7.61679e+07	8.36663e+07
M189T102	N-Alpha-acetyllysine	189.123	102.375	188.116	C8H16N2O3	BioDeepDB	Carboxylic acids and derivatives	1.15619e+09	1.1795e+09	1.0357e+09	1.07519e+09	1.09692e+09	1.39217e+09	1.67924e+09	9.09388e+08	1.55246e+09	1.96788e+09
M176T157	N-Formyl-L-glutamic acid	176.055	156.818	175.048	C6H9NO5	MetaDNA	Carboxylic acids and derivatives	1.35031e+07	8.67978e+06	9.21715e+06	5.56748e+06	8.53737e+06	1.46871e+07	1.089e+07	1.34513e+07	1.46168e+07	1.27876e+07
M176T224	N-Formyl-L-methionine	176.038	223.797	177.046	C6H11NO3S	BioDeepDB	Carboxylic acids and derivatives	4.33565e+06	2.42619e+06	4.61251e+06	6.11084e+06	2.50643e+06	9.99744e+07	1.36097e+08	1.11847e+08	1.0958e+08	1.0353e+08
M100T76	N-Heptane	99.5314	75.848	100.125	C7H16	BioDeepDB	Saturated hydrocarbons	1.85627e+07	1.84382e+07	2.50442e+07	2.84275e+08	5.21106e+07	2.66481e+07	1.20479e+07	2.59205e+07	8.942e+06	6.31753e+06
M100T350	N-Methyl-2-pyrrolidinone	100.076	349.851	99.0684	C5H9NO	mzCloud	Extractables/Leachables; Industrial Chemicals; Textile Chemicals/Auxiliary/Dyes; Excipients/Additives/Colorants; Personal Care Products/Cosmetics	3.0529e+08	2.00535e+08	4.3803e+08	2.2864e+08	2.30869e+08	1.36771e+08	1.33793e+08	1.0936e+08	1.30147e+08	1.44282e+08
M144T222_1	N-Methyl-L-glutamic acid	144.065	222.223	161.069	C6H11NO4	BioDeepDB	Unknow	1.86424e+08	4.27879e+08	1.36563e+08	3.50662e+08	1.96776e+08	8.08926e+07	6.26887e+07	5.25476e+07	5.11447e+07	5.26965e+07
M248T254	N-Succinyl-L-glutamate	248.076	254.012	247.069	C9H13NO7	MetaDNA	Carboxylic acids and derivatives	6.7071e+07	4.46073e+07	6.91641e+07	4.89804e+07	4.24596e+07	6.32943e+07	8.82026e+07	4.40427e+07	6.75305e+07	5.09117e+07
M136T343	N,N-Dimethyl-1,4-phenylenediamine	136.076	342.535	136.1	C8H12N2	BioDeepDB	Unknow	3.83571e+07	3.23502e+07	3.88271e+07	2.89816e+07	3.64247e+07	2.07056e+08	2.70883e+08	2.28194e+08	2.47003e+08	2.82728e+08
M328T781	N,N-Dimethylsphingosine	328.32	780.663	327.314	C20H41NO2	BioDeepDB	Organonitrogen compounds	1.35572e+08	1.5565e+08	1.38031e+08	9.77587e+07	1.19485e+08	1.28945e+08	1.09066e+08	9.82876e+07	1.1613e+08	1.18534e+08
M161T80	N(6)-Methyllysine	161.128	80.4505	160.121	C7H16N2O2	MetaDNA	Carboxylic acids and derivatives	5.88622e+07	2.04689e+08	1.86095e+08	1.32042e+08	1.71274e+08	9.32368e+07	9.87474e+07	5.87018e+07	1.04982e+08	8.80318e+07
M276T97	N2-gamma-Glutamylglutamine	276.119	97.4007	275.112	C10H17N3O6	MoNA	Carboxylic acids and derivatives	3.70217e+08	6.00709e+08	2.79611e+08	5.15529e+08	4.93477e+08	2.65792e+08	2.98737e+08	2.96575e+08	1.4216e+08	2.57778e+08
M275T104_2	N2-Succinyl-L-arginine	275.135	104.103	274.128	C10H18N4O5	MetaDNA	Carboxylic acids and derivatives	9.74603e+07	6.56438e+07	8.78518e+07	7.0241e+07	7.88749e+07	4.9253e+07	5.68115e+07	4.65979e+07	6.4988e+07	4.78306e+07
M233T146	N2-Succinyl-L-ornithine	233.112	145.893	232.106	C9H16N2O5	MetaDNA	Carboximidic acids and derivatives	8.60279e+08	7.68972e+08	7.91656e+08	6.13406e+08	7.4478e+08	3.20613e+08	1.60774e+07	2.4602e+08	2.63008e+08	2.32358e+08
M277T88	N6-(L-1,3-Dicarboxypropyl)-L-lysine	277.139	87.9564	276.132	C11H20N2O6	mzCloud	Carboxylic acids and derivatives	1.38661e+09	1.38892e+09	1.12917e+09	2.10671e+09	1.47057e+09	1.25788e+09	2.42061e+09	7.06817e+08	1.68899e+09	1.69558e+09
M189T143	N6-Acetyl-L-lysine	189.123	143.353	188.116	C8H16N2O3	BioDeepDB	Carboxylic acids and derivatives	1.27689e+09	1.26997e+09	1.06901e+09	1.08586e+09	1.10368e+09	9.73587e+08	1.15863e+09	4.77168e+08	1.11041e+09	1.57037e+09
M188T86	N8-Acetylspermidine	188.176	85.9932	187.168	C9H21N3O	BioDeepDB	Carboximidic acids and derivatives	6.03074e+08	4.88607e+08	4.10903e+08	6.81995e+08	4.86009e+08	8.19926e+07	9.92418e+07	7.02705e+07	7.59827e+07	1.0257e+08
M275T785	Nandrolone	275.2	785.121	274.193	C18H26O2	MoNA	Steroids and steroid derivatives	1.87702e+06	1.08259e+06	2.66143e+06	1.31295e+06	1.14096e+06	1.67305e+06	5.25869e+06	3.99197e+06	4.33457e+06	1.90022e+06
M195T709	Neocnidilide	195.138	709.302	194.131	C12H18O2	BioDeepDB	Lactones	1.08627e+07	9.28375e+06	1.45321e+07	5.86066e+06	8.49413e+06	5.13438e+06	9.8019e+06	8.93225e+06	7.24584e+06	7.18517e+06
M123T154	Niacinamide	123.055	153.741	122.048	C6H6N2O	BioDeepDB	Pyridines and derivatives	3.02024e+10	2.64348e+10	3.10812e+10	1.74934e+10	2.47917e+10	1.59265e+10	1.41774e+10	1.44657e+10	1.50168e+10	1.31241e+10
M335T100	Nicotinamide ribotide	335.063	100.021	334.057	C11H15N2O8P	BioDeepDB	Pyridine nucleotides	1.12804e+09	1.22188e+09	8.742e+08	8.60914e+08	1.00536e+09	2.92899e+08	2.32655e+08	2.12508e+08	2.29742e+08	1.95803e+08
M256T102	Nicotinate D-ribonucleoside	256.081	102.44	256.082	C11H14NO6	MetaDNA	Azacyclic compounds	1.32934e+09	1.18085e+09	6.52998e+08	8.80025e+08	1.21472e+09	1.36642e+08	1.17552e+08	1.29182e+08	1.41458e+08	1.3014e+08
M122T125	Nicotinic acid	122.024	125.308	123.032	C6H5NO2	BioDeepDB	Pyridines and derivatives	8.5281e+07	2.35368e+08	2.26433e+08	2.91484e+08	2.14197e+08	4.21789e+07	1.49516e+07	4.43194e+07	4.24667e+07	1.37204e+08
M122T506	Nitrobenzene	122.023	505.717	123.032	C6H5NO2	mzCloud	Benzene and substituted derivatives	3.80135e+07	3.28484e+07	2.65327e+07	2.21193e+07	5.87405e+06	3.57698e+07	8.55934e+06	2.93531e+07	1.68618e+08	2.65333e+07
M389T95	Nodakenin	389.13	95.2348	408.142	C20H24O9	OTCML	Coumarins	5.64147e+07	9.44138e+07	1.38103e+08	7.01901e+07	9.62346e+07	4.83119e+07	1.26796e+08	4.46235e+07	1.38859e+08	1.25544e+08
M287T204	Nopaline	287.135	204.156	304.138	C11H20N4O6	MetaDNA	Carboxylic acids and derivatives	3.06993e+07	2.95379e+06	2.11639e+07	1.92567e+07	1.24963e+07	1.78652e+08	1.63603e+08	1.68215e+08	1.88218e+08	2.00505e+08
M170T39	Norepinephrine	169.977	38.9682	169.074	C8H11NO3	BioDeepDB	Phenols	8.07536e+07	5.01174e+07	1.11891e+07	1.03544e+07	1.11718e+07	1.0049e+07	4.40162e+07	3.35036e+07	3.1877e+07	4.90132e+07
M147T769	Nornicotine	146.965	768.9	148.1	C9H12N2	BioDeepDB	Pyridines and derivatives	9.66592e+07	1.66613e+09	2.6754e+08	3.49918e+08	5.29547e+07	3.82022e+08	7.21963e+08	2.84926e+08	2.34878e+09	7.05834e+08
M162T179	O-Acetyl-L-homoserine	162.076	179.213	161.069	C6H11NO4	MetaDNA	Carboxylic acids and derivatives	1.11269e+08	3.99116e+07	9.23365e+07	4.74916e+07	4.40267e+07	5.14386e+08	5.2625e+08	4.60114e+08	6.56453e+08	4.6428e+08
M205T129	O-Acetylcarnitine	205.126	129.191	204.124	C9H18NO4	BioDeepDB	Unknow	2.14241e+08	2.01915e+08	1.68266e+08	2.02934e+08	2.71629e+07	4.179e+07	8.00194e+07	3.49547e+07	3.72426e+07	3.26569e+07
M142T31	O-Phosphoethanolamine	141.958	30.9087	141.019	C2H8NO4P	BioDeepDB	Organic phosphoric acids and derivatives	4.88265e+08	3.59533e+08	4.27448e+08	4.96982e+08	3.94479e+08	3.6085e+08	4.28561e+08	5.1083e+08	4.25388e+08	4.89614e+08
M220T232	O-Succinyl-L-homoserine	220.081	232.361	219.074	C8H13NO6	BioDeepDB	Unknow	1.04677e+07	8.28551e+06	4.01921e+07	2.1141e+07	8.41743e+06	7.06155e+07	8.79257e+07	1.28139e+08	6.55832e+07	6.1038e+07
M284T785	Octadecanamide	284.295	785.248	283.288	C18H37NO	GNPS	Fatty Acyls	8.74902e+07	9.84621e+07	3.25521e+07	4.23407e+07	6.44941e+07	1.91519e+07	2.92831e+07	4.37248e+07	4.39771e+07	4.0016e+07
M265T806	Oleic acid	265.253	806.407	282.256	C18H34O2	BioDeepDB	Fatty Acyls	2.49124e+07	873090	1.86987e+06	1.89038e+06	2.90789e+06	6.65135e+07	1.1103e+07	433769	199222	275201
M290T170	Ophthalmic acid	290.134	169.984	289.285	C11H19N3O6	BioDeepDB	Carboxylic acids and derivatives	1.18725e+08	8.98956e+07	1.02144e+08	9.62393e+07	8.81208e+07	2.46189e+08	1.67646e+08	2.49501e+08	2.38694e+08	2.12434e+08
M194T388	Orciprenaline	194.117	388.33	211.121	C11H17NO3	BioDeepDB	Phenols	7.25506e+07	6.57277e+07	6.69643e+07	5.11596e+07	6.48199e+07	5.61459e+07	7.83975e+07	5.00541e+07	3.62215e+07	4.10365e+07
M133T79	Ornithine	133.097	78.9969	132.09	C5H12N2O2	BioDeepDB	Carboxylic acids and derivatives	4.02541e+08	4.65819e+08	8.0766e+08	3.26326e+08	3.69118e+08	1.2351e+09	4.21117e+08	1.17498e+09	1.30994e+09	7.64126e+08
M400T595	Oxacillin	400.103	594.921	401.104	C19H19N3O5S	BioDeepDB	Carboxylic acids and derivatives	0	0	0	0	0	15110.4	0	0	0	0
M91T587	Oxalic acid dihydrate	90.5261	586.567	90.0349	Unknow	BioDeepDB	Unknow	3.97153e+09	7.26599e+08	1.06251e+09	8.73255e+08	8.78153e+08	2.30366e+09	2.75132e+08	1.14165e+09	6.93435e+08	7.03575e+08
M287T78	Oxazepam	287.057	78.052	286.051	C15H11ClN2O2	mzCloud	Benzodiazepines	807134	1.93626e+06	4.24629e+06	0	580776	3.07283e+07	4.20582e+06	7.60583e+06	3.01969e+07	2.50902e+07
M613T209_2	Oxidized glutathione	613.165	208.956	612.152	C20H32N6O12S2	BioDeepDB	Carboxylic acids and derivatives	2.10086e+09	1.92169e+09	1.8996e+09	2.65044e+09	1.35257e+09	2.03287e+09	1.82914e+09	5.87164e+08	1.51118e+09	1.86604e+09
M159T100_1	Oxoadipic acid	159.029	100.118	160.037	C6H8O5	BioDeepDB	Keto acids and derivatives	1.76139e+07	8.93663e+06	3.78896e+07	3.07477e+07	1.34819e+07	1.06503e+07	7.99531e+06	1.04625e+07	2.28559e+07	6.72229e+06
M145T173	Oxoglutaric acid	145.065	172.697	146.022	C5H6O5	BioDeepDB	Keto acids and derivatives	1.45065e+07	2.92361e+07	4.6227e+06	4.86512e+06	2.62969e+07	1.50466e+07	1.31919e+07	3.39218e+07	1.96325e+07	1.5828e+07
M302T105	Oxymorphone	302.134	104.73	301.131	C17H19NO4	mzCloud	Phenanthrenes and derivatives	3.80931e+07	4.16136e+07	4.06297e+07	2.65917e+07	3.35489e+07	1.1404e+08	1.97353e+07	9.68152e+07	9.73953e+07	9.36946e+07
M243T655	Oxyresveratrol	243.06	655.149	244.074	C14H12O4	OTCML	Unknow	1.01026e+07	1.05899e+07	4.76973e+07	3.70834e+07	3.92721e+06	2.03593e+07	5.09825e+07	1.32157e+07	3.13537e+07	5.73845e+06
M138T96	p-Aminobenzoic acid	138.054	96.3134	137.048	C7H7NO2	BioDeepDB	Benzene and substituted derivatives	6.19133e+07	4.85454e+07	5.44016e+07	1.3588e+08	5.72974e+07	6.80348e+07	6.7313e+07	5.64833e+07	5.00287e+07	4.73175e+07
M167T257	p-Hydroxymandelic acid	167.034	256.574	168.042	C8H8O4	MoNA	Phenols	320699	579871	1.23184e+06	1.05387e+06	2.61548e+06	3.62161e+06	2.3871e+06	3.82428e+06	6.99353e+06	3.24791e+06
M151T379	p-Hydroxyphenylacetic acid	151.039	378.562	152.047	C8H8O3	MoNA	Phenols	3.47988e+07	479866	6.2818e+07	5.40585e+07	4.00756e+07	7.68836e+06	1.24207e+06	1.21832e+07	1.63552e+07	7.06981e+06
M136T396	p-Octopamine	136.076	396.302	153.079	C8H11NO2	BioDeepDB	Phenols	1.74058e+07	1.63964e+07	1.39043e+07	1.70333e+07	9.69172e+07	2.74707e+07	1.95611e+07	2.40244e+07	2.49442e+07	2.40406e+07
M255T667	Palmitic acid	255.073	667.123	256.24	C16H32O2	BioDeepDB	Fatty Acyls	1.14142e+07	8.31843e+06	2.10242e+07	1.13078e+08	8.78085e+06	1.51654e+07	1.4246e+07	1.52181e+07	1.68983e+08	2.83033e+06
M220T366	Pantothenic acid	220.117	366.214	219.111	C9H17NO5	BioDeepDB	Alcohols and polyols	3.35443e+09	2.15228e+09	2.90273e+09	2.05713e+09	2.6609e+09	5.91769e+08	8.22722e+08	5.73434e+08	5.7166e+08	5.31052e+08
M158T770	Pelargonic acid	158.153	770.075	158.131	C9H18O2	BioDeepDB	Fatty Acyls	1.46112e+08	1.4038e+08	1.3816e+08	1.13086e+08	1.23361e+08	1.0832e+08	1.10959e+08	1.14425e+08	1.18061e+08	1.12924e+08
M153T345	Penicillic acid	153.054	344.862	170.058	C8H10O4	mzCloud	Natural Toxins	6.40251e+06	7.63738e+06	7.10243e+06	6.47701e+06	6.96142e+06	2.76355e+06	3.89999e+07	2.23342e+06	2.92984e+06	4.08061e+07
M162T538	Phenibut	162.091	538.231	179.095	C10H13NO2	mzCloud	Drugs of Abuse/Illegal Drugs	3.26176e+06	2.33808e+06	2.21869e+06	1.40895e+06	3.39996e+06	3.28194e+07	2.13255e+07	2.52537e+07	2.11353e+07	1.7105e+07
M135T837	Phenyl acetate	134.894	837.4	136.052	C8H8O2	BioDeepDB	Unknow	1.41861e+07	4.90328e+07	9.91594e+07	5.21557e+08	4.18911e+06	2.12522e+07	1.31006e+07	1.33987e+07	4.003e+07	1.79552e+07
M137T346	Phenylacetic acid	137.06	346.211	136.052	C8H8O2	BioDeepDB	Benzene and substituted derivatives	1.9311e+06	1.57978e+06	2.81649e+06	2.0772e+06	4.24808e+06	3.21707e+06	3.30075e+07	1.31702e+07	1.33287e+07	3.35211e+07
M194T824	Phenylacetylglycine	194.155	824.07	193.074	C10H11NO3	BioDeepDB	Carboxylic acids and derivatives	1.4333e+08	8.27241e+07	2.44691e+07	6.90152e+07	2.5236e+07	7.87231e+07	1.14359e+08	7.39064e+07	2.35251e+07	7.60512e+07
M121T504	Phenylethylamine	121.028	503.998	121.089	C8H11N	BioDeepDB	Benzene and substituted derivatives	4.90077e+06	6.33668e+06	5.15846e+06	5.58403e+07	2.19561e+06	4.01706e+06	2.6508e+07	4.93452e+06	4.27189e+07	3.86919e+06
M165T365	Phenyllactate	165.055	365.387	166.063	C9H10O3	mzCloud	Phenylpropanoic acids	9.10804e+07	1.02133e+06	9.67672e+07	3.66368e+07	1.08159e+06	2.70119e+07	6.57852e+06	3.30386e+07	4.20733e+07	2.50824e+07
M127T247	Phloroglucinol	127.038	246.762	126.032	C6H6O3	mzCloud	Benzene and substituted derivatives	1.06244e+08	8.20438e+07	7.56868e+07	3.37086e+08	2.13015e+08	2.92925e+09	2.27698e+08	1.93538e+08	4.72e+08	1.5067e+08
M256T73	Phosphocreatine disodium salt	255.943	72.8504	255	C4H8N3Na2O5P	BioDeepDB	Unknow	6.60022e+07	3.2736e+07	3.50394e+07	2.81883e+07	3.59423e+07	8.73359e+06	2.22224e+07	7.255e+06	2.3437e+07	5.93902e+06
M140T101	Phosphonoacetate	140.07	100.536	139.988	C2H5O5P	BioDeepDB	Organic phosphonic acids and derivatives	5.93879e+06	2.43151e+06	3.40827e+06	2.35811e+07	1.52327e+06	7.96537e+06	2.96147e+07	6.62855e+06	2.21899e+07	7.30143e+06
M149T346	Phthalic acid	149.023	346.313	166.027	C8H6O4	BioDeepDB	Benzene and substituted derivatives	7.08472e+06	9.74297e+06	6.01894e+07	3.1011e+07	7.35279e+06	4.60491e+06	3.11446e+07	2.3646e+06	2.45471e+07	2.58123e+07
M122T366	Picolinic acid	122.024	366.054	123.032	C6H5NO2	mzCloud	Pyridines and derivatives	8.06631e+07	8.08506e+06	3.49998e+07	1.52788e+08	4.82263e+07	6.10166e+07	5.56589e+07	5.23935e+07	2.80818e+07	6.86511e+07
M130T105	Pipecolic acid	130.086	104.667	129.079	C6H11NO2	BioDeepDB	Carboxylic acids and derivatives	1.0752e+10	1.31152e+10	1.15235e+10	6.90343e+09	9.62343e+09	6.4007e+09	7.17548e+09	5.34258e+09	6.15157e+09	6.57364e+09
M86T234	Piperidine	86.0965	233.792	85.0891	C5H11N	MoNA	Piperidines	3.73768e+09	3.63813e+09	3.39013e+09	2.22285e+09	3.1433e+09	2.84959e+09	1.86526e+09	2.69133e+09	2.55911e+09	2.63304e+09
M318T177	Piplartine	318.129	176.969	317.126	C17H19NO5	BioDeepDB	Cinnamic acids and derivatives	1.72188e+07	1.20158e+07	5.79038e+07	3.01377e+07	3.87403e+07	2.8719e+08	2.00299e+08	2.41368e+08	1.61037e+08	1.40015e+08
M241T171	Pirbuterol	241.154	170.633	240.147	C12H20N2O3	mzCloud	Pyridines and derivatives	4.67475e+08	1.76424e+09	1.94306e+09	9.43055e+08	2.21109e+09	5.93302e+08	2.04003e+08	6.00428e+07	4.95112e+08	2.67089e+08
M226T700	Porphobilinogen	226.179	699.983	226.095	C10H14N2O4	BioDeepDB	Organonitrogen compounds	1.63427e+08	2.65551e+08	2.79466e+08	4.14256e+08	1.92484e+08	1.05131e+08	7.98673e+07	1.15991e+08	1.08229e+08	1.10274e+08
M189T83	Potassium 1-carboxyvinyl hydrogenphosphate	189.16	82.5886	205.938	C3H4KO6P	BioDeepDB	Unknow	9.1418e+09	1.08254e+10	1.11042e+10	5.85547e+09	8.76674e+09	7.3502e+07	6.03939e+08	7.68601e+07	2.60861e+08	1.02489e+09
M285T190	Promethazine	285.144	189.758	284.135	C17H20N2S	MoNA	Benzothiazines	273142	97404.5	326102	795093	197880	5.20537e+07	1.05606e+08	4.63043e+07	5.10618e+07	9.80056e+07
M218T290	Propionylcarnitine	218.138	289.97	217.131	C10H19NO4	MoNA	Fatty Acyls	1.41445e+09	1.43093e+09	7.45445e+08	9.97656e+08	9.55311e+08	5.82001e+08	4.31266e+08	7.91888e+08	4.27671e+08	2.59968e+08
M105T785	Propyl chloroformate	105.043	784.692	122.013	C4H7ClO2	BioDeepDB	Unknow	5.86229e+07	3.26332e+07	4.20817e+07	5.03487e+06	2.97231e+07	1.86763e+07	4.2458e+06	4.91894e+06	1.29608e+07	3.95982e+06
M334T779	Prostaglandin B2	334.209	779.449	334.214	C20H30O4	BioDeepDB	Fatty Acyls	5.07984e+07	1.11907e+08	7.76608e+07	8.11799e+07	9.0181e+07	2.89466e+07	5.74675e+07	3.85965e+07	4.77785e+07	3.9452e+07
M335T793	Prostaglandin D2	335.219	792.767	352.225	C20H32O5	MetaDNA	Carboxylic acids and derivatives	5.7596e+06	1.58691e+07	1.57799e+07	3.49522e+06	4.10141e+06	2.59552e+06	2.06898e+07	2.01842e+07	4.71558e+06	5.12085e+06
M337T813	Prostaglandin E1	337.234	813.487	354.241	C20H34O5	BioDeepDB	Fatty Acyls	3.35626e+06	4.92259e+06	5.33462e+06	5.10238e+06	8.61917e+06	1.60482e+07	1.22133e+07	6.17431e+06	1.58603e+07	6.63271e+06
M337T802_2	Prostaglandin F2a	337.236	801.886	354.241	C20H34O5	BioDeepDB	Fatty Acyls	4.63362e+06	2.11514e+07	1.27318e+07	2.29057e+07	3.07428e+07	495594	1.35483e+07	1.49367e+07	1.38312e+07	1.27608e+07
M351T718	Prostaglandin G2	351.215	718.243	368.22	C20H32O6	BioDeepDB	Fatty Acyls	3.59632e+06	743443	3.53413e+06	369295	819746	3.99425e+06	3.27194e+06	3.52762e+06	3.71981e+06	3.6637e+06
M335T820	Prostaglandin H2	335.219	819.936	352.225	C20H32O5	BioDeepDB	Fatty Acyls	4.54864e+07	3.79749e+07	5.23127e+07	1.40704e+07	6.44442e+06	7.03366e+07	6.07599e+07	7.5396e+07	6.15128e+07	4.11142e+07
M153T129	Protocatechuic acid	153.018	128.644	154.027	C7H6O4	BioDeepDB	Benzene and substituted derivatives	933103	1.01342e+08	2.50129e+08	1.22085e+08	8.08602e+07	839431	939248	752329	1.7752e+07	813222
M243T155	Pseudouridine	243.062	155.411	244.07	C9H12N2O6	MoNA	Nucleoside and nucleotide analogues	3.45263e+07	9.16177e+07	4.69898e+07	6.2421e+07	1.12201e+08	3.3079e+07	9.52834e+06	9.10851e+06	1.22362e+07	6.33621e+06
M164T223	Pterin	164.057	222.815	163.049	C6H5N5O	BioDeepDB	Pteridines and derivatives	1.736e+08	1.47147e+08	1.4208e+08	8.60584e+07	1.62883e+08	6.87135e+07	8.69465e+07	7.06189e+07	6.00254e+07	7.31176e+07
M89T75_2	Putrescine	89.1078	74.9668	88.1	C4H12N2	BioDeepDB	Unknow	4.56474e+07	2.97002e+07	5.06342e+07	3.66683e+07	3.00023e+07	1.00746e+08	7.61501e+07	9.95601e+07	9.77279e+07	1.11782e+08
M168T151	Pyridoxal	168.065	150.599	167.058	C8H9NO3	mzCloud	Pyridines and derivatives	3.4961e+07	2.77366e+07	2.94269e+07	2.46722e+07	8.29329e+06	8.35476e+06	1.96543e+07	8.30986e+06	2.71152e+07	7.45184e+06
M169T352	Pyridoxamine	169.097	352.228	168.09	C8H12N2O2	MoNA	Pyridines and derivatives	4.15805e+07	3.36319e+07	4.15325e+07	4.81532e+07	3.37281e+07	8.47244e+07	7.62446e+07	9.38836e+07	6.25612e+07	5.2827e+07
M224T800	pyridoxamine dihydrochloride	223.988	799.717	241.115	C8H14Cl2N2O2	BioDeepDB	Organooxygen compounds	1.76782e+07	1.66878e+07	3.88138e+07	5.59285e+07	1.42652e+07	1.04509e+07	8.29989e+06	3.40844e+07	2.30734e+07	1.51203e+07
M168T301	Pyridoxine	168.065	301.178	169.074	C8H11NO3	BioDeepDB	Pyridines and derivatives	1.34143e+07	2.09003e+06	2.20897e+06	1.17967e+07	1.43715e+06	4.20467e+06	4.59903e+06	4.86786e+06	7.73167e+06	4.48895e+06
M128T93_3	Pyroglutamic acid	128.074	93.1154	129.043	C5H7NO3	BioDeepDB	Carboxylic acids and derivatives	1.96809e+06	5.33785e+07	2.09769e+07	5.67527e+06	4.296e+07	775899	1.1094e+06	1.57803e+06	2.45199e+06	0
M177T80	Pyrophosphate	176.935	80.1942	177.943	H4P2O7	BioDeepDB	Non-metal oxoanionic compounds	1.77954e+08	1.69153e+08	3.39217e+08	3.69949e+07	3.34343e+08	9.77167e+08	9.79371e+08	7.67962e+08	1.08701e+09	9.29754e+08
M111T702	Pyrrole-2-carboxylic acid	111.02	702.107	111.032	C5H5NO2	BioDeepDB	Pyrroles	2.10264e+08	1.97579e+08	3.08357e+08	1.34243e+08	1.66883e+08	2.26865e+08	2.71237e+08	1.89465e+08	2.27354e+08	2.31794e+08
M130T353	Pyrrolidonecarboxylic acid	130.05	353.194	129.043	C5H7NO3	BioDeepDB	Carboxylic acids and derivatives	2.31053e+08	1.17979e+09	2.46484e+08	2.21461e+08	2.19144e+09	1.39125e+09	1.1051e+09	6.3511e+08	5.84575e+08	9.37102e+08
M87T144	Pyruvic acid	87.007	144.006	88.016	C3H4O3	BioDeepDB	Keto acids and derivatives	4.40524e+07	3.34986e+07	1.69146e+08	2.68767e+08	5.75148e+06	8.43195e+06	3.98422e+07	8.48835e+06	7.24689e+07	6.76093e+06
M174T159	Quinaldic acid	174.112	159.15	173.048	C10H7NO2	BioDeepDB	Quinolines and derivatives	2.57561e+08	2.75185e+08	2.01718e+08	1.97333e+08	3.61924e+08	1.55698e+08	1.86906e+08	1.90551e+08	1.02469e+08	1.13837e+08
M191T179	Quinic acid	191.055	178.556	192.063	C7H12O6	OTCML	Unknow	6.06984e+06	44749.2	2.13973e+07	1.48466e+07	15776.6	4.57658e+06	1.11697e+06	4.26026e+06	2.43587e+07	3.75213e+06
M112T143_1	Quinoline	112.051	143.496	129.058	C9H7N	BioDeepDB	Quinolines and derivatives	2.54869e+08	2.09888e+08	1.03339e+08	2.62781e+08	2.31264e+08	9.42658e+07	9.63723e+07	8.34033e+07	7.88116e+07	6.61709e+07
M167T572	Quinolinic acid	167.012	571.885	167.022	C7H5NO4	BioDeepDB	Pyridines and derivatives	1.18929e+09	5.5191e+08	8.19005e+08	7.76749e+08	7.96586e+08	1.39798e+09	2.17169e+08	6.86809e+08	1.73831e+09	2.16542e+08
M267T733	Retinol	267.16	732.896	286.23	C20H30O	BioDeepDB	Unknow	1.18856e+06	251432	1.4827e+07	920841	462149	488468	285870	315077	5.2912e+06	271443
M151T487	Ribitol	151.059	487.212	152.069	C5H12O5	BioDeepDB	Organooxygen compounds	7.02803e+07	9.89992e+07	4.41477e+08	2.23008e+08	1.19804e+08	4.50508e+07	8.03408e+07	1.23489e+07	4.12448e+07	9.85208e+06
M377T455	Riboflavin	377.144	455.22	376.138	C17H20N4O6	BioDeepDB	Pteridines and derivatives	1.72017e+08	1.44695e+08	4.16311e+07	6.93877e+07	1.77772e+08	1.36542e+08	9.4169e+07	1.13198e+08	9.1977e+07	9.24239e+07
M211T101	Ribose 1-phosphate	211.001	101.268	230.019	C5H11O8P	MetaDNA	Organic oxides	9.54151e+07	1.02497e+06	1.51428e+08	1.29345e+08	905706	1.67349e+07	3.72659e+06	1.33456e+07	1.43216e+06	1.68989e+06
M309T811	Ribose 1,5-bisphosphate	309.173	811.049	309.986	C5H12O11P2	BioDeepDB	Organooxygen compounds	4.09464e+07	7.88252e+07	8.04785e+07	4.7791e+07	2.18213e+08	4.46278e+07	3.2926e+07	2.94234e+07	4.49374e+07	3.62136e+07
M359T441	Rosmarinic acid	359.076	440.949	360.084	C18H16O8	BioDeepDB	Cinnamic acids and derivatives	308481	23657	1.35126e+08	1.15229e+08	26964	4.96351e+07	4.54858e+07	1.43118e+08	1.59002e+08	4.67106e+07
M383T324	S-Adenosylhomocysteine	383.115	324.315	384.122	C14H20N6O5S	BioDeepDB	5'-deoxyribonucleosides	1.50273e+08	1.69115e+06	1.1079e+08	7.17263e+07	1.93126e+06	1.6729e+07	2.83448e+07	3.29787e+07	4.03498e+07	2.96779e+07
M427T97	S-Glutathionyl-L-cysteine	427.093	97.377	426.088	C13H22N4O8S2	MetaDNA	Carboxylic acids and derivatives	3.71922e+08	3.73313e+08	1.41023e+08	3.96829e+08	3.9393e+08	7.73142e+07	7.6102e+07	6.71891e+07	8.03883e+07	9.10999e+07
M379T243	S-Lactoylglutathione	379.103	243.232	379.105	C13H21N3O8S	MetaDNA	Carbothioic S-esters	3.98405e+07	3.69536e+07	3.42809e+07	6.8325e+07	3.92401e+07	1.19812e+08	7.35676e+07	1.49541e+08	1.00547e+08	1.04845e+08
M136T445	Salicylamide	136.039	444.805	137.048	C7H7NO2	BioDeepDB	Phenols	947337	985553	1.22502e+07	1.23952e+07	869540	3.20778e+06	8.93048e+06	9.74198e+06	1.34241e+07	8.01863e+06
M137T436	Salicylic acid	137.024	436.325	138.032	C7H6O3	BioDeepDB	Benzene and substituted derivatives	8.64602e+06	6.51543e+06	1.93385e+07	5.42614e+07	4.64533e+06	2.52378e+07	2.71386e+07	2.80269e+07	3.85468e+07	4.57519e+07
M194T335	Salicyluric acid	194.045	335.325	195.053	C9H9NO4	BioDeepDB	Benzene and substituted derivatives	1.57082e+07	3.38773e+06	1.33991e+07	1.67272e+07	175710	7.6792e+06	3.76486e+06	6.94276e+06	8.8976e+06	4.51709e+06
M89T89	Sarcosine	89.0228	89.4991	89.0477	C3H7NO2	BioDeepDB	Carboxylic acids and derivatives	2.59411e+09	3.172e+09	5.69045e+09	5.20788e+09	2.69487e+09	8.93324e+08	6.16325e+08	9.81743e+08	1.56047e+09	1.01339e+09
M207T346	Scoparone	207.065	346.177	206.058	C11H10O4	OTCML	Coumarins	1.94697e+06	2.4335e+06	2.60977e+06	1.54178e+06	2.20225e+06	1.40313e+07	1.80513e+08	1.6033e+07	1.6461e+07	1.74006e+08
M201T407	Sebacic acid	201.113	406.703	202.12	C10H18O4	MoNA	Fatty Acyls	2.80182e+06	551492	784894	1.87665e+07	369226	3.08767e+08	8.76498e+07	1.47146e+08	4.27449e+08	1.54913e+08
M209T91	Sedoheptulose	209.066	90.5716	210.074	C7H14O7	BioDeepDB	Organooxygen compounds	2.09049e+06	1.6887e+07	8.94637e+06	6.0747e+06	1.34977e+07	6.94916e+06	1.16585e+07	3.38959e+06	2.18108e+06	1.22382e+07
M198T208	Selenomethionine	198.007	208.407	196.995	C5H11NO2Se	BioDeepDB	Carboxylic acids and derivatives	5.92945e+07	5.24603e+07	5.2961e+07	4.40984e+07	5.39366e+07	4.87078e+07	3.46173e+07	4.21981e+07	4.67629e+07	4.08756e+07
M159T402	Serotonin	159.091	402.185	176.095	C10H12N2O	MoNA	Indoles and derivatives	5.5329e+08	4.2426e+08	4.03324e+08	2.05168e+08	4.19132e+08	1.11611e+08	6.43657e+07	1.26973e+08	1.04734e+08	1.04411e+08
M405T335	Shanzhiside methyl ester	405.148	334.784	406.148	C17H26O11	OTCML	Terpenoids	162508	27810.7	259381	142612	29462	7.75797e+06	5.47385e+06	1.14745e+06	2.6756e+06	9.81192e+06
M173T152	Shikimic acid	173.045	152.074	174.053	C7H10O5	MoNA	Organooxygen compounds	2.39231e+06	99825.7	3.146e+06	9.07716e+06	112438	4.73647e+06	1.32745e+06	1.53122e+06	1.92744e+07	1.36805e+06
M223T329	Sinapic acid	223.061	328.769	224.069	C11H12O5	MoNA	Cinnamic acids and derivatives	2.79655e+06	2.90467e+06	3.81316e+06	3.75324e+06	1.73775e+06	3.93138e+06	1.26669e+07	2.36436e+06	6.54697e+06	1.22354e+07
M263T715	Sodium (2R,3R,4S,5R)-2,3,4,5-tetrahydroxy-6-oxohexyl hydrogenphosphate	263.083	715.273	282.012	C6H12NaO9P	BioDeepDB	Unknow	1.16384e+07	2.54399e+07	1.43715e+07	1.87331e+07	1.98294e+07	1.30889e+07	1.92392e+07	1.92447e+07	2.19566e+07	2.06092e+07
M244T90	Sodium 1-hydroxy-2-(1H-indol-3-yl)ethane-1-sulfonate	244.067	89.6346	263.023	C10H10NNaO4S	BioDeepDB	Unknow	1.87408e+06	5.85107e+06	3.85643e+07	6.77691e+07	7.37977e+06	5.72222e+07	3.87717e+07	5.92186e+07	1.2671e+08	5.66224e+07
M415T811	Sodium deoxycholate	415.208	811.269	414.275	C24H39O4. Na	BioDeepDB	Unknow	2.50767e+08	1.90732e+08	2.01585e+08	5.95909e+07	1.2062e+08	2.22896e+07	4.63713e+07	4.34064e+07	7.21313e+07	8.41937e+06
M185T360	Sodium phenylpyruvate	185.081	360.149	186.029	C9H7NaO3	BioDeepDB	Unknow	2.09106e+06	426014	1.24748e+06	1.15865e+07	389825	691590	601569	2.6832e+06	1.59136e+06	626420
M181T177	Sorbitol	181.013	176.732	182.079	C6H14O6	BioDeepDB	Organooxygen compounds	2.43785e+06	1.74793e+06	1.97761e+06	1.69425e+06	1.32717e+06	2.11412e+06	1.1248e+07	2.42253e+06	2.2657e+06	7.65467e+06
M333T190	Spectinomycin	333.165	189.609	332.158	C14H24N2O7	MoNA	Dioxanes	7.5029e+06	2.74895e+06	1.60972e+06	2.01481e+06	1.3695e+07	3.28116e+07	3.25244e+07	3.64632e+07	5.16825e+07	4.55417e+07
M146T68_2	Spermidine	146.109	67.697	145.158	C7H19N3	BioDeepDB	Organonitrogen compounds	1.27185e+07	9.95679e+06	1.90506e+06	5.83806e+06	3.55042e+06	9.88944e+07	1.3093e+07	1.17118e+08	4.01287e+07	1.36792e+07
M203T66	Spermine	203.223	65.6986	202.216	C10H26N4	BioDeepDB	Organonitrogen compounds	1.78661e+08	8.28397e+07	1.43251e+08	1.00282e+08	2.09394e+08	3.04581e+09	1.39105e+09	3.25223e+09	3.01654e+09	1.89249e+09
M144T100	Stachydrine	144.101	100.407	143.095	C7H13NO2	OTCML	Unknow	4.19275e+08	3.89806e+08	4.01518e+08	3.31616e+08	3.85123e+08	6.17331e+08	5.56316e+08	5.91481e+08	5.72556e+08	5.48759e+08
M285T548	Stearic acid	285.13	548.41	284.272	C18H36O2	BioDeepDB	Fatty Acyls	1.92791e+07	2.52887e+06	1.09923e+07	1.39203e+06	2.23126e+06	1.05335e+07	1.35599e+07	1.04477e+07	1.24793e+07	970737
M277T793	Stearidonic acid	277.216	792.519	276.209	C18H28O2	BioDeepDB	Fatty Acyls	1.57868e+07	3.52762e+06	3.39623e+06	2.69034e+06	3.16071e+06	4.9431e+06	3.91712e+06	4.70216e+06	3.89387e+06	3.88081e+06
M263T801	Stearolic acid	263.237	800.657	280.24	C18H32O2	mzCloud	Endogenous Metabolites; Natural Products/Medicines	1.86698e+07	2.85852e+07	3.98701e+07	6.41279e+07	5.21186e+07	141792	4.48781e+07	2.48474e+07	3.09858e+07	9.78222e+06
M121T347	Styrene Oxide	121.065	346.92	120.058	C8H8O	MetaDNA	Benzene and substituted derivatives	5.82141e+07	4.92378e+07	4.32403e+07	2.82532e+07	4.59944e+07	3.35079e+07	4.02271e+07	2.93534e+07	3.35343e+07	3.86664e+07
M117T84	Succinic acid	117.018	84.0722	118.027	C4H6O4	BioDeepDB	Carboxylic acids and derivatives	2.7938e+09	2.05555e+09	1.94666e+09	2.64238e+09	2.27715e+09	1.20385e+09	6.70951e+08	1.20457e+09	2.05169e+09	9.16252e+08
M101T831	Succinic acid semialdehyde	101.023	831.248	102.032	C4H6O3	BioDeepDB	Fatty Acyls	3.17518e+06	2.88761e+06	1.73491e+07	1.17337e+07	2.49429e+06	4.03523e+06	4.00681e+06	2.29994e+07	9.48143e+06	2.40115e+07
M343T746	Sucrose	343.294	746.085	342.116	C12H22O11	BioDeepDB	Organooxygen compounds	9.19973e+06	8.13522e+06	5.18866e+06	9.06502e+06	8.11701e+06	8.25261e+06	6.94634e+06	5.76068e+06	1.00599e+07	6.18484e+06
M171T63	Sulfanilamide	171.019	63.3974	172.031	C6H8N2O2S	BioDeepDB	Benzene and substituted derivatives	3.27016e+06	3.60802e+06	1.33965e+07	3.99581e+06	3.73331e+06	3.95466e+06	1.48157e+07	1.37975e+07	4.24716e+06	3.08882e+06
M123T127	Sulfoacetaldehyde	122.975	127.305	123.983	C2H4O4S	MetaDNA	Organic oxides	8.24097e+07	3.20126e+06	1.16977e+08	6.83043e+07	1.64759e+06	2.09813e+06	2.08361e+06	1.79968e+06	2.72472e+06	1.74456e+06
M183T346	Syringaldehyde	183.065	346.311	182.058	C9H10O4	OTCML	Unknow	8.38438e+07	8.20596e+07	7.60921e+07	5.09743e+07	6.89212e+07	8.56551e+07	2.32768e+08	9.04815e+07	9.67641e+07	2.17076e+08
M197T298	Syringic acid	197.044	297.649	198.053	C9H10O5	BioDeepDB	Benzene and substituted derivatives	1.72847e+06	92707.8	3.40166e+06	8.44052e+06	81476.6	255094	100422	166710	448744	68744.5
M124T89	Taurine	124.006	88.7018	125.015	C2H7NO3S	BioDeepDB	Organic sulfonic acids and derivatives	5.20694e+08	5.10242e+08	9.07204e+08	5.94958e+08	4.78434e+08	1.39605e+08	1.843e+08	1.46541e+08	1.93942e+08	1.47673e+08
M180T440	Theophylline	180.066	440.147	180.065	C7H8N4O2	BioDeepDB	Imidazopyrimidines	7.06324e+06	5.0227e+06	6.20325e+06	6.73116e+06	6.1795e+06	3.55077e+07	2.08889e+07	3.27231e+07	2.37589e+07	1.8883e+07
M166T100	Thioguanine	166.017	100.35	167.027	C5H5N5S	mzCloud	Imidazopyrimidines	2.31548e+08	2.27431e+08	8.10383e+08	2.005e+08	2.343e+08	2.14952e+07	4.79081e+07	1.06698e+08	1.32544e+08	8.7183e+07
M242T628	Thymidine	242.176	627.781	242.09	C10H14N2O5	BioDeepDB	Pyrimidine nucleosides	4.52461e+06	1.73037e+07	1.45633e+08	3.20166e+08	6.28296e+06	2.07144e+06	1.94227e+06	5.10047e+06	1.38885e+07	2.07569e+06
M126T76	Thymine	125.986	75.8014	126.043	C5H6N2O2	BioDeepDB	Diazines	1.15008e+08	1.08321e+08	1.29089e+08	4.2956e+08	9.39835e+07	3.98166e+07	2.30192e+07	4.51155e+07	2.34299e+07	2.19272e+07
M135T199	Toluate	135.044	198.833	136.052	C8H8O2	mzCloud	Benzene and substituted derivatives	7.69385e+06	6.91975e+07	8.69659e+06	6.04403e+06	2.36791e+07	1.26438e+07	5.80778e+06	1.30227e+07	8.96607e+06	4.9223e+06
M339T146	Topiramate	339.091	146.152	339.099	C12H21NO8S	MoNA	Dioxolopyrans	2.27393e+07	1.79447e+07	1.72567e+07	1.25183e+07	2.09125e+07	1.61277e+08	1.1985e+08	1.06595e+08	1.25419e+08	1.17838e+08
M173T80	trans-Aconitic acid	173.008	80.1329	174.016	C6H6O6	MetaDNA	Carboxylic acids and derivatives	2.14525e+08	2.37561e+08	2.21523e+08	3.05279e+08	2.24572e+08	3.28134e+08	3.28267e+08	3.45769e+08	4.33683e+08	3.27105e+08
M147T330	trans-Cinnamate	147.044	329.732	148.052	C9H8O2	BioDeepDB	Unknow	7.40726e+07	7.72871e+06	5.82064e+07	5.09607e+07	8.56907e+06	3.69129e+07	2.45431e+07	4.55167e+07	4.40198e+07	4.08842e+07
M310T172	trans-Cinnamoyl beta-D-glucoside	310.114	171.661	310.105	C15H18O7	MetaDNA	Benzene and substituted derivatives	6.50838e+06	341033	9.63968e+06	1.46172e+07	183837	1.4214e+07	6.14165e+06	1.65311e+07	1.5872e+07	1.04247e+07
M341T96	Trehalose	341.109	96.2262	342.116	C12H22O11	BioDeepDB	Organooxygen compounds	6.88353e+08	7.21206e+08	1.15223e+09	6.10692e+08	5.75516e+08	1.23671e+09	1.64699e+09	2.86308e+08	1.81235e+09	1.67306e+09
M421T81	Trehalose 6-phosphate	421.074	81.1743	422.082	C12H23O14P	MoNA	Organooxygen compounds	4.51669e+06	1.79512e+07	3.14886e+07	1.11962e+07	1.396e+07	1.37134e+08	5.04294e+07	1.7374e+08	2.51596e+08	8.77055e+07
M127T408	Triacetate lactone	127.039	407.789	126.032	C6H6O3	mzCloud	Endogenous Metabolites	2.89608e+08	2.89628e+08	2.52214e+08	1.66258e+08	2.26665e+08	1.93158e+09	3.43336e+08	4.97665e+08	3.78835e+08	7.29818e+07
M298T799	Tridemorph	298.31	798.508	297.303	C19H39NO	mzCloud	Oxazinanes	4.2776e+07	9.71958e+06	1.42095e+06	5.26563e+07	6.45291e+07	9.21895e+06	1.03311e+07	4.30479e+07	3.79229e+07	1.47478e+07
M132T103	Triethanolamine	132.101	103.322	149.105	C6H15NO3	mzCloud	Amines	1.45589e+09	1.62862e+09	2.64836e+09	5.31887e+08	9.68229e+08	1.39618e+09	1.42751e+09	1.1716e+09	1.43319e+09	4.86896e+08
M101T101	Triethylamine	101.06	101.304	101.12	C6H15N	BioDeepDB	Amines	3.19787e+08	2.00444e+08	2.38938e+08	2.03967e+08	2.64583e+08	2.72156e+08	2.63054e+08	1.88102e+08	2.5439e+08	3.64091e+08
M114T101	Trifluoroacetic acid	114.091	101.306	113.993	C2HF3O2	BioDeepDB	Carboxylic acids and derivatives	1.18615e+10	1.02909e+10	1.1203e+10	7.38542e+09	1.04263e+10	2.43942e+09	3.2466e+09	2.65363e+09	2.76268e+09	3.25398e+09
M203T101	Tryptophanamide	203.103	100.687	203.106	C11H13N3O	MetaDNA	Azacyclic compounds	1.00268e+08	8.65682e+07	8.93632e+07	9.83802e+07	9.72125e+07	1.50418e+08	1.19008e+08	1.41425e+08	2.6067e+08	2.04385e+08
M138T229	Tyramine	138.091	229.472	137.084	C8H11NO	BioDeepDB	Benzene and substituted derivatives	2.4199e+08	1.65286e+08	1.53259e+08	1.09653e+08	1.82517e+08	6.90788e+07	1.03789e+07	1.21137e+08	9.19285e+07	8.80266e+06
M178T418	Tyrosine methylester	178.086	418.379	195.089	C10H13NO3	MoNA	Carboxylic acids and derivatives	5.05384e+06	4.63139e+06	5.43918e+06	1.57886e+06	1.58761e+06	2.06657e+07	2.32776e+07	1.49993e+07	1.65469e+07	1.64309e+07
M121T229	Tyrosol	121.065	229.464	138.068	C8H10O2	BioDeepDB	Phenols	8.24634e+08	5.67047e+08	5.36117e+08	3.40311e+08	7.14093e+08	2.30179e+08	9.26958e+06	4.85489e+08	3.11488e+08	3.55388e+07
M253T290	Tyrosyl-Alanine	253.118	290.106	252.111	C12H16N2O4	mzCloud	Carboxylic acids and derivatives	1.05649e+07	6.56024e+06	4.88942e+06	4.11003e+06	2.63651e+06	2.64981e+07	2.66213e+07	2.70797e+07	3.37547e+07	3.25447e+07
M325T136	UMP	325.042	135.689	324.036	C9H13N2O9P	BioDeepDB	Pyrimidine nucleotides	1.82071e+07	5.87601e+06	2.43198e+07	2.5933e+07	4.12366e+06	3.56022e+08	4.99022e+08	3.70838e+08	4.12163e+08	4.15286e+08
M187T63	Undecanoic acid	186.956	62.5247	186.162	C11H22O2	BioDeepDB	Fatty Acyls	2.26687e+07	1.51958e+08	2.76709e+08	2.71401e+07	2.72159e+07	6.20628e+07	2.00563e+08	1.61107e+08	1.9952e+07	2.07611e+07
M113T144	Uracil	113.035	144.229	112.027	C4H4N2O2	BioDeepDB	Diazines	1.78827e+07	7.80371e+07	3.16646e+08	1.41133e+08	1.40268e+07	4.27303e+08	2.72263e+08	3.58036e+08	2.70237e+08	2.58624e+08
M157T778	Uracil 5-carboxylate	157.028	778.168	156.017	C5H4N2O4	BioDeepDB	Unknow	3.24313e+07	3.43107e+07	3.79658e+07	4.54135e+07	6.08941e+07	4.46398e+07	6.72672e+07	3.1759e+07	3.48349e+07	3.03966e+07
M167T102	Uric acid	167.02	101.553	168.028	C5H4N4O3	BioDeepDB	Imidazopyrimidines	8.14221e+07	1.27388e+08	1.63651e+08	2.31159e+08	1.14176e+08	1.06591e+08	1.38166e+07	1.24153e+08	1.0922e+08	5.93983e+07
M243T262	Uridine	243.06	262.484	244.07	C9H12N2O6	OTCML	Unknow	2.97626e+07	8.83952e+06	1.56296e+07	3.88495e+07	7.71156e+06	3.45603e+07	3.21123e+07	1.07931e+07	1.66996e+07	2.36283e+07
M565T85	Uridine diphosphate glucose	565.047	85.4438	566.055	C15H24N2O17P2	BioDeepDB	Pyrimidine nucleotides	3.54599e+07	5.11899e+07	7.78422e+07	3.36812e+07	3.94989e+07	2.48815e+07	4.32492e+07	1.86021e+07	3.01246e+07	3.86319e+07
M447T813	Uridine-5-diphosphate disodium salt	447.135	812.576	447.966	C9H12N2Na2O12P2	BioDeepDB	Unknow	1.19607e+07	1.29487e+07	4.49201e+06	1.6973e+07	3.06427e+06	8.11088e+06	3.75853e+06	3.88187e+06	2.40236e+07	3.66819e+06
M139T104	Urocanic acid	139.05	103.846	138.043	C6H6N2O2	BioDeepDB	Azoles	6.97506e+07	1.69524e+07	1.00922e+08	9.72008e+07	1.70756e+07	5.86432e+07	2.9852e+07	3.95249e+07	1.00422e+08	5.03684e+07
M265T443	Valyl-Phenylalanine	265.154	442.917	264.147	C14H20N2O3	mzCloud	Carboxylic acids and derivatives	8.80921e+07	5.79855e+07	8.57859e+07	5.09289e+07	6.16946e+07	8.44722e+07	7.95409e+07	8.18933e+07	7.53003e+07	7.78123e+07
M215T338_2	Valyl-Proline	215.139	337.833	214.132	C10H18N2O3	mzCloud	Carboxylic acids and derivatives	3.79158e+08	2.88569e+08	2.85171e+08	1.60999e+08	2.75172e+08	4.85341e+08	1.50685e+08	2.16805e+08	2.58522e+08	2.44706e+08
M153T187	Xanthine	153.04	186.98	152.033	C5H4N4O2	BioDeepDB	Imidazopyrimidines	1.18697e+08	2.38426e+08	2.05375e+08	2.93864e+08	1.95339e+08	5.50422e+08	3.82961e+07	5.86313e+08	2.98052e+08	1.60284e+08
M283T724	Xanthosine	283.068	724.5	284.076	C10H12N4O6	GNPS	Purine nucleosides	1.27117e+06	568411	142838	1.29056e+06	167449	9.38426e+06	9.82787e+06	1.62299e+06	1.39157e+06	28438.4

## Sheet: Table S7
Table S7. List of differential metabolites identified by LC-MS/MS analysis platform
Metabolites	class	sub_class	VIP	p.value	Fold Change	log2(foldchange)
Inosine	Nucleotides and derivatives		1.356	2.39e-05	17.767	4.151
1-Methylguanosine	Nucleotides and derivatives		1.339	5.46e-05	9.264	3.212
Hypoxanthine	Nucleotides and derivatives		1.306	0.000194	23.271	4.54
2-Deoxyadenosine	Nucleotides and derivatives		1.251	0.00084	9.906	3.308
1-Methyladenosine	Nucleotides and derivatives		1.305	0.0002	12.003	3.585
Nicotinate D-ribonucleoside	Nucleotides and derivatives		1.333	7.36e-05	6.897	2.786
Guanine	Nucleotides and derivatives		1.371	9.13e-06	6.424	2.683
Guanosine	Nucleotides and derivatives		1.376	6.26e-06	6.24	2.642
Adenosine	Nucleotides and derivatives		1.365	1.34e-05	5.245	2.391
dAMP	Nucleotides and derivatives		1.035	0.0174	3.622	1.857
CMP	Nucleotides and derivatives		1.371	8.84e-06	3.874	1.954
Thioguanine	Nucleotides and derivatives		1.04	0.0663	3.924	1.972
Pseudouridine	Nucleotides and derivatives		1.351	0.00777	4.028	2.01
Cytidine	Nucleotides and derivatives		1.042	0.0164	3.171	1.665
5-Methylthioadenosine	Nucleotides and derivatives		1.277	0.000458	2.566	1.36
Cyclic GMP	Nucleotides and derivatives		1.124	0.00676	2.119	1.084
Deoxyribose	Carbohydrates and derivatives		1.37	9.42e-06	13.749	3.781
Ribose 1-phosphate	Carbohydrates and derivatives		1.034	0.0683	9.903	3.308
Glucosamine	Carbohydrates and derivatives		1.119	0.00716	3.666	1.874
Ergothioneine	Amino acids, peptides, and analogues		1.173	0.00348	5.157	2.366
Sarcosine	Amino acids, peptides, and analogues		1.418	0.00375	3.531	1.82
L-Arginine	Amino acids, peptides, and analogues		1.58	0.000231	2.793	1.482
Taurine	Amino acids, peptides, and analogues		1.536	0.00062	3.434	1.78
L-Tryptophan	Amino acids, peptides, and analogues		1.238	0.00113	3.589	1.843
L-Methionine	Amino acids, peptides, and analogues		1.274	0.000491	2.039	1.028
L-Tyrosine	Amino acids, peptides, and analogues		1.231	0.00128	2.03	1.021
N-Methyl-L-glutamic acid	Amino acids, peptides, and analogues		1.107	0.00824	3.834	1.939
beta-Alanyl-L-lysine	Amino acids, peptides, and analogues		1.144	0.00524	6.509	2.702
N2-Succinyl-L-ornithine	Amino acids, peptides, and analogues		1.339	5.5e-05	3.235	1.694
D-Alanyl-D-alanine	Amino acids, peptides, and analogues		1.067	0.0578	8.549	3.096
Diaminopimelic acid	Amino acids, peptides, and analogues		1.087	0.0519	7.337	2.875
S-Glutathionyl-L-cysteine	Amino acids, peptides, and analogues		1.246	0.00094	3.976	1.991
Asymmetric dimethylarginine	Amino acids, peptides, and analogues		1.382	3.8e-06	2.738	1.453
L-Dopa	Amino acids, peptides, and analogues		1.192	0.00257	10.609	3.407
4-Acetamidobutanoic acid	Amino acids, peptides, and analogues		1.24	0.00107	3.656	1.87
Stearolic acid	Fatty acids and derivatives		1.029	0.0184	2.618	1.388
12-Keto-leukotriene B4	Fatty acids and derivatives		1.417	0.0038	2.101	1.071
alpha-Ketoisovaleric acid	Organic acids		1.385	2.82e-06	2.66	1.411
(R)-3-Hydroxybutyric acid	Organic acids		1.119	0.00721	2.585	1.37
3-Methyl-2-oxovaleric acid	Organic acids		1.11	0.00798	16.078	4.007
Pantothenic acid	Vitamins		1.348	3.58e-05	3.784	1.92
Biotin	Vitamins		1.133	0.00602	1.951	1.001
Nicotinic acid	Vitamins		1.393	0.00503	3.236	1.694
D-Xylitol	Others	Alcohols	1.17	0.0319	9.217	3.204
Ribitol	Others	Alcohols	1.108	0.0464	6.803	2.766
D-Arabitol	Others	Alcohols	1.21	0.0019	6.707	2.746
myo-Inositol	Others	Alcohols	1.077	0.0548	3.979	1.993
Tyrosol	Others	Alcohols	1.054	0.0146	2.739	1.454
Mannitol	Others	Alcohols	1.175	0.031	1.194	0.256
L-Carnitine	Others	Alkaloids	1.393	1.23e-06	15.282	3.934
(S)-Carnitine	Others	Alkaloids	1.133	0.006	6.867	2.78
Acetylcholine	Others	Alkaloids	1.361	1.71e-05	4.354	2.122
Choline sulfate	Others	Alkaloids	1.408	1.05e-07	3.699	1.887
Choline	Others	Alkaloids	1.379	4.68e-06	4.223	2.078
O-Acetylcarnitine	Others	Alkaloids	1.04	0.0167	2.97	1.57
Propionylcarnitine	Others	Alkaloids	1.121	0.00697	2.105	1.074
Acetylcarnitine	Others	Alkaloids	1.365	1.35e-05	2.528	1.338
Betaine	Others	Alkaloids	1.09	0.01	1.221	0.289
Hydroquinone	Others	Phenols	1.401	3.89e-07	15.559	3.96
p-Hydroxyphenylacetic acid	Others	Phenols	1.119	0.0435	3.182	1.67
Protocatechuic acid	Others	Phenols	1.167	0.0325	24.055	4.588
Andrographolide	Others	Terpenoids	1.591	0.000171	2.659	1.411
Genistein	Others	Isoflavonoids	1.095	0.0498	439	8.778
Melanin	Others	Carbonyl compounds	1.177	0.00327	3.055	1.611
Nicotinamide ribotide	Others	Nicotinamide nucleotides	1.381	3.95e-06	4.107	2.038
Serotonin	Others	Indoles and derivatives	1.256	0.00076	3.7	1.888
Sulfoacetaldehyde	Others	Carbonyl compounds	1.093	0.0504	25.611	4.679
L-Cystathionine	Others	Carboxylic acids and derivatives	1.641	3.13e-05	22.289	4.478
L-Arogenate	Others	Carboxylic acids and derivatives	1.157	0.0346	3.455	1.789
N-Acetyl-D-Glucosamine 6-Phosphate	Others	Carboxylic acids and derivatives	1.415	0.00388	5.653	2.499
Homogentisate	Others	Phenylacetic acids	1.011	0.0762	5.577	2.479
N8-Acetylspermidine	Others	Carboximidic acids	1.36	1.9e-05	5.556	2.474
Indoleacetaldehyde	Others	Indoles	1.281	0.000406	3.935	1.976
Beta-Guanidinopropionic acid	Others	Guanidines	1.252	0.000831	3.831	1.938
N-Acetylputrescine	Others	Carboximidic acids	1.349	3.38e-05	3.341	1.74
Trifluoroacetic acid	Others	Alpha-halocarboxylic acids and derivatives	1.366	1.3e-05	3.321	1.732
Isoquinoline	Others	Isoquinolines and derivatives	1.309	0.000176	3.177	1.668
2-Aminobenzoic acid	Others	Benzoic acids and derivatives	1.11	0.00797	3.052	1.61
Imidazolelactic acid	Others	Imidazoles	1.084	0.0107	2.87	1.521
Quinoline	Others	Quinolines and derivatives	1.197	0.00239	2.519	1.333
Tyramine	Others	Phenethylamines	1.055	0.0144	2.43	1.281
Porphobilinogen	Others	Amines	1.071	0.0122	2.247	1.168
Benzoic acid	Others	Benzoic acids and derivatives	1.273	0.000511	2.223	1.153
2-Hydroxy-2-ethylsuccinic acid	Others	Carboxylic acids and derivatives	1.286	0.000355	2.216	1.148
3,4-Dihydroxyphenylpropanoate	Others	Phenylpropanoic acids	1.255	0.000775	2.144	1.101
Beta-Glycerophosphoric acid	Others	Glycerophosphates	1.627	5.48e-05	9.849	3.3
6-Amino-6-deoxyfutalosine	Unknow	Unknow	1.298	0.000255	34.477	5.108
Sodium deoxycholate	Unknow	Unknow	1.115	0.00754	4.005	2.002
Potassium 1-carboxyvinyl hydrogenphosphate	Unknow	Unknow	1.363	1.54e-05	20.678	4.37
Phosphocreatine disodium salt	Unknow	Unknow	1.027	0.0188	2.249	1.169
6-Methyladenine	Nucleotides and derivatives		1.664	9.7e-06	0.094	-3.41
Deoxyinosine	Nucleotides and derivatives		1.468	0.00195	0.194	-2.366
GMP	Nucleotides and derivatives		1.394	1.07e-06	0.042	-4.587
AMP	Nucleotides and derivatives		1.417	7.23e-09	0.01	-6.688
UMP	Nucleotides and derivatives		1.403	2.81e-07	0.036	-4.804
dGMP	Nucleotides and derivatives		1.29	0.0135	0.144	-2.798
2-Deoxyadenosine monohydrate	Nucleotides and derivatives		1.267	0.000589	0.423	-1.241
Guanosine 3-phosphate	Nucleotides and derivatives		1.115	0.00753	0.271	-1.883
D-Galactose （14）	Carbohydrates and derivatives		1.183	0.0294	0.164	-2.605
L-Fucose	Carbohydrates and derivatives		1.243	0.0194	0.226	-2.149
Trehalose 6-phosphate	Carbohydrates and derivatives		1.357	0.00733	0.123	-3.026
D-Lyxose	Carbohydrates and derivatives		1.26	0.000695	0.083	-3.587
6-Acetyl-D-glucose	Carbohydrates and derivatives		1.033	0.0686	0.396	-1.338
Alpha-D-Glucose	Carbohydrates and derivatives		1.37	0.00643	0.353	-1.502
Maltotriose	Carbohydrates and derivatives		1.217	0.0235	0.314	-1.672
Cellobiose	Carbohydrates and derivatives		1.362	1.69e-05	0.29	-1.786
D-(+)-Maltose monohydrate	Carbohydrates and derivatives		1.098	0.00918	0.4	-1.321
Glyceric acid	Carbohydrates and derivatives		1.537	0.000603	0.3	-1.738
Glyceraldehyde	Carbohydrates and derivatives		1.158	0.0344	0.291	-1.783
L-Glutamic acid	Amino acids, peptides, and analogues		1.396	7.57e-07	0.258	-1.954
L-Lysine	Amino acids, peptides, and analogues		1.612	9.17e-05	0.237	-2.074
L-Isoleucine	Amino acids, peptides, and analogues		1.403	2.68e-07	0.203	-2.299
Beta-Leucine	Amino acids, peptides, and analogues		1.266	0.0162	0.18	-2.474
Ornithine	Amino acids, peptides, and analogues		1.048	0.0155	0.424	-1.237
Carnosine	Amino acids, peptides, and analogues		1.346	0.00813	0.41	-1.288
N-Acetyl-DL-methionine	Amino acids, peptides, and analogues		1.384	2.97e-06	0.008	-6.997
L-Alanyl-gamma-D-glutamyl-L-lysine	Amino acids, peptides, and analogues		1.632	4.46e-05	0.211	-2.241
cis-4-Hydroxy-D-proline	Amino acids, peptides, and analogues		1.411	5.22e-08	0.082	-3.611
N-Acetyl-L-phenylalanine	Amino acids, peptides, and analogues		1.626	5.63e-05	0.069	-3.855
N-Acetyl-DL-tryptophan	Amino acids, peptides, and analogues		1.551	0.000454	0.197	-2.347
Tyrosyl-Alanine	Amino acids, peptides, and analogues		1.381	4.19e-06	0.197	-2.347
N-Formyl-L-methionine	Amino acids, peptides, and analogues		1.707	1.74e-07	0.037	-4.766
Hydroxyisoleucine	Amino acids, peptides, and analogues		1.076	0.0117	0.029	-5.1
S-Lactoylglutathione	Amino acids, peptides, and analogues		1.174	0.00342	0.465	-1.104
Leucylproline	Amino acids, peptides, and analogues		1.201	0.00221	0.366	-1.451
5-Acetamidovalerate	Amino acids, peptides, and analogues		1.637	3.68e-05	0.152	-2.718
O-Succinyl-L-homoserine	Amino acids, peptides, and analogues		1.261	0.000669	0.151	-2.726
L-Methionine S-oxide	Amino acids, peptides, and analogues		1.406	1.58e-07	0.051	-4.296
O-Acetyl-L-homoserine	Amino acids, peptides, and analogues		1.388	2.03e-06	0.096	-3.377
L-3-Hydroxykynurenine	Amino acids, peptides, and analogues		1.412	3.9e-08	0.095	-3.393
Hydroxykynurenine	Amino acids, peptides, and analogues		1.404	2.37e-07	0.093	-3.428
N-Acetylasparagine	Amino acids, peptides, and analogues		1.434	0.00308	0.404	-1.308
Acetylglycine	Amino acids, peptides, and analogues		1.1	0.0483	0.342	-1.548
epsilon-(gamma-L-Glutamyl)-L-lysine	Amino acids, peptides, and analogues		1.092	0.00983	0.32	-1.642
N-Acetylleucine	Amino acids, peptides, and analogues		1.675	4.75e-06	0.138	-2.856
1-Methylhistidine	Amino acids, peptides, and analogues		1.223	0.00151	0.157	-2.674
N-Acetyl-L-glutamate 5-semialdehyde	Amino acids, peptides, and analogues		1.389	1.8e-06	0.169	-2.565
9,10,13-TriHOME	Fatty acids and derivatives		1.26	0.0171	0.007	-7.06
Prostaglandin G2	Fatty acids and derivatives		1.039	0.0168	0.453	-1.141
Prostaglandin H2	Fatty acids and derivatives		1.207	0.00201	0.383	-1.385
Azelaic acid	Fatty acids and derivatives		1.009	0.0771	0.331	-1.594
Sebacic acid	Fatty acids and derivatives		1.351	0.00773	0.02	-5.62
Heptanoic acid	Fatty acids and derivatives		1.084	0.0107	0.416	-1.264
13-L-Hydroperoxylinoleic acid	Fatty acids and derivatives		1.299	0.000242	0.184	-2.44
Gluconic acid	Organic acids		1.481	0.00161	0.491	-1.025
Acetoacetic acid	Organic acids		1.312	0.000162	0.379	-1.398
cis-Aconitic acid	Organic acids		1.28	0.00042	0.379	-1.4
Sinapic acid	Organic acids		1.012	0.0759	0.422	-1.245
Ophthalmic acid	Organic acids		1.347	3.88e-05	0.417	-1.26
Gamma-Tocotrienol	Vitamins		1.111	0.00785	0.4	-1.323
Theophylline	Others	Alkaloids	1.277	0.000459	0.277	-1.85
Nopaline	Others	Alkaloids	1.411	5.3e-08	0.089	-3.491
Ecgonine	Others	Alkaloids	1.416	1.05e-08	0.064	-3.975
Caffeine	Others	Alkaloids	1.332	7.45e-05	0.196	-2.354
Dopamine	Others	Phenols	1.375	6.72e-06	0.228	-2.13
Atractylenolide II	Others	Terpenoids	1.289	0.000326	0.375	-1.414
Shanzhiside methyl ester	Others	Terpenoids	1.299	0.0124	0.022	-5.514
8-O-Acetylharpagide	Others	Terpenoids	1.671	6.18e-06	0.081	-3.632
3,4-Dihydroxyphenylglycol	Others	Benzenediols	1.104	0.0474	0.284	-1.814
Spectinomycin	Others	Dioxanes	1.337	5.97e-05	0.11	-3.187
Nandrolone	Others	Estrane steroids	1.167	0.00379	0.167	-2.584
3-Indoleacetonitrile	Others	Indoles	1.002	0.0796	0.378	-1.405
Mannitol 1-phosphate	Others	Organic oxides	1.587	0.000194	0.355	-1.495
Agmatine	Others	Guanidines	1.102	0.00874	0.3	-1.737
3-Hydroxybenzoic acid	Others	Benzoic acids and derivatives	1.108	0.0464	0.291	-1.779
1,3-Benzenediol	Others	Benzene and substituted derivatives	1.373	7.98e-06	0.271	-1.882
L-Pyrrolysine	Others	Amines	1.34	5.22e-05	0.283	-1.821
Pyrophosphate	Others	Non-metal pyrophosphates	1.578	0.00024	0.267	-1.907
Tyrosine methylester	Others	Carboxylic acids and derivatives	1.349	3.44e-05	0.202	-2.307
5-Hydroxyindoleacetic acid	Others	Indolyl carboxylic acids and derivatives	1.262	0.000668	0.197	-2.341
Aspartylglycosamine	Others	Carboximidic acids and derivatives	1.602	0.000126	0.183	-2.448
Cadaverine	Others	Amines	1.281	0.000414	0.17	-2.558
3-Hydroxyanthranilic acid	Others	Benzoic acids and derivatives	1.646	2.5e-05	0.254	-1.975
D-Mannonate	Others	Carboxylic acids and derivatives	1.535	0.000632	0.165	-2.6
Coniferin	Others	Glycosyl compounds	1.012	0.076	0.153	-2.712
3-Methoxyanthranilate	Others	Benzoic acids and derivatives	1.57	0.000293	0.122	-3.034
1H-Indole-3-acetamide	Others	Indoles	1.699	5.23e-07	0.063	-3.999
9,10-12,13-Diepoxyoctadecanoate	Others	Carbonyl compounds	1.008	0.0774	0.058	-4.102
6-Hydroxymelatonin	Others	Hydroxyindoles	1.612	9.14e-05	0.05	-4.319
Spermine	Others	Amines	1.309	0.00018	0.049	-4.343
4-(Glutamylamino) butanoate	Others	Amines	1.337	6.15e-05	0.028	-5.169
Promethazine	Others	Phenothiazines	1.264	0.000633	0.004	-7.98
2-Amino-5-oxohexanoate	Others	Amines	1.159	0.0343	0.48	-1.059
(3S,5S)-3,5-Diaminohexanoate	Others	Amines	1.186	0.00286	0.478	-1.064
Fomepizole	Others	Pyrazoles	1.062	0.0134	0.477	-1.069
Pyrrole-2-carboxylic acid	Others	Pyrrole carboxylic acids and derivatives	1.298	0.000251	0.461	-1.116
1-Aminocyclopropanecarboxylic acid	Others	Carboxylic acids and derivatives	1.22	0.00159	0.437	-1.195
trans-Cinnamoyl beta-D-glucoside	Others	Benzene and substituted derivatives	1.105	0.047	0.437	-1.195
1-Pyrroline-5-carboxylic acid	Others	Azacyclic compounds	1.398	5.98e-07	0.402	-1.314
Topiramate	Unknow	Unknow	1.385	2.86e-06	0.145	-2.784
N,N-Dimethyl-1,4-phenylenediamine	Unknow	Unknow	1.402	3.19e-07	0.14	-2.833
(2R,3R)-3-Methylglutamyl-5-semialdehyde-N6-lysine	Unknow	Unknow	1.125	0.00662	0.125	-3.004
Oxymorphone	Unknow	Unknow	1.083	0.0108	0.351	-1.509
Sodium 1-hydroxy-2-(1H-indol-3-yl)ethane-1-sulfonate	Unknow	Unknow	1.086	0.0523	0.343	-1.542
2,6-Dihydroxypyridine hydrochloride	Unknow	Unknow	1.324	0.000105	0.323	-1.63
Putrescine	Unknow	Unknow	1.361	1.73e-05	0.323	-1.631
gamma-Glutamyltyramine	Unknow	Unknow	1.383	3.41e-06	0.283	-1.82
Milrinone	Unknow	Unknow	1.153	0.0355	0.491	-1.027
1-Deoxynojirimycin	Unknow	Unknow	1.152	0.00466	0.32	-1.646
N-Acetyl-L-glutamine	Unknow	Unknow	1.711	8.22e-08	0.198	-2.335
3-Methyloxindole	Unknow	Unknow	1.36	1.92e-05	0.158	-2.665
Phenibut	Unknow	Unknow	1.339	5.53e-05	0.11	-3.178
Piplartine	Unknow	Unknow	1.338	5.84e-05	0.108	-3.211
Phenylacetic acid	Unknow	Unknow	1.011	0.0217	0.108	-3.213
3-O-Methyldopa Monohydrate	Unknow	Unknow	1.374	7.33e-06	0.101	-3.305
p-Hydroxymandelic acid	Unknow	Unknow	1.403	0.00449	0.119	-3.068
2-Aminophenol	Unknow	Unknow	1.188	0.00274	0.451	-1.15
