# Supplementary figures and images for: Integration of Physiological, Transcriptomic and Metabolomic Reveals Molecular Mechanism of Paraisaria dubia Response to Zn2+ Stress
Source: MDPI journal article supplement (doi:10.3390/jof9070693), 2023-06-21

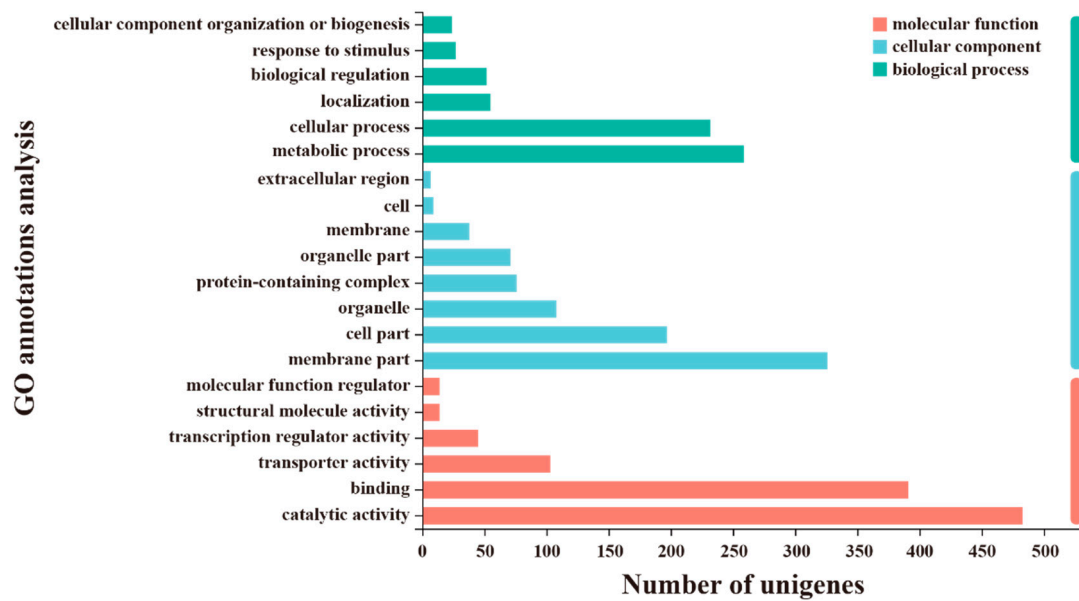

**Figure S1.** Histogram of GO classification of *P.dubia* differential expression genes.

Supplement: s1 [file s1]
